# Supplementary material for: Coelacanth genomes reveal signatures for evolutionary transition from water to land
Source: HighWire-hosted journal article supplement (doi:10.1101/gr.158105.113), 2013-07-20
Supplement: Supplemental_Table_11.xlsx [file Supplemental_Table_11.xlsx]

## Sheet: 11A
Supplementary Table 11A. Coelacanth genes having homology to the known vetebrate proteins
coelacanth	human	chicken	frog	zebrafish	takifugu
A00003	NP_001027024	XP_420999			XP_003967824
A00004	NP_079526	XP_414776	NP_001120249	XP_684174	XP_003964912
R00005	NP_065132	XP_001233701	NP_001120157	NP_956851
A00007	XP_003960418		XP_002940595
A00011	NP_001077004	XP_417188	NP_001039145	NP_001003769	XP_003976707
R00014	NP_002578	NP_001039292	NP_001096175	XP_700763	XP_003971239
A00020	NP_006636	XP_425187	NP_001011090	XP_001337454	XP_003977059
A00021	NP_060627	XP_416305		NP_001005588	XP_003967359
A00022			NP_001120529	NP_001038173
R00023	NP_006531	XP_001231578	NP_001135631	NP_571852	XP_003968030
A00024	NP_078780		XP_002937124		XP_003968029
A00027	NP_061822	XP_003642372	XP_002935993	XP_687540	XP_003978783
R00030	NP_001348	XP_422834	XP_002937403	NP_001188373	XP_003979237
A00031	NP_112195	XP_003641983			XP_003969521
A00035	NP_055682			XP_685639
R00036	NP_003961	NP_990466	XP_002935205	XP_003199488	XP_003978076
R00040				XP_003200841
A00041	NP_006353		NP_001039200	XP_001923961	XP_003970273
A00042					XP_003971900
R00043	NP_003155	NP_001006295	NP_001007991	NP_001002333	XP_003970270
R00044	NP_056274	XP_003640977	NP_001016595	NP_001006016	XP_003970249
R00046	NP_001734	NP_001103834	NP_001008160	NP_892012	XP_003963666
R00047	NP_001012680	XP_426125	XP_002941505	NP_571676	XP_003966945
A00049	NP_002149			XP_001923743
R00050	NP_001073970		XP_002933273	NP_001003594	XP_003977218
A00051	NP_001026866	XP_421399	NP_001011023		XP_003968741
A00052				XP_001343400
R00053	NP_006418	XP_421397	NP_001039138	XP_700568	XP_003962480
R00054	NP_001004343	XP_419549	NP_001037987	NP_956592	XP_003972287
A00056	NP_776171	XP_001231669	NP_001096317	NP_956559	XP_003970289
R00057	NP_997262	XP_421395	XP_002940764	XP_003200427	XP_003962699
R00058	NP_006464		XP_002933254	NP_001186651	XP_003966840
R00061	NP_036332	XP_416565	NP_001025520	NP_001015059	NP_001033080
A00064	NP_000731	NP_990730	XP_002935876	XP_700381	XP_003963780
A00065	NP_006259	NP_989662	NP_001184101	NP_997861	XP_003971192
A00066	NP_060140	XP_001236782		NP_001002500	XP_003966837
R00068					XP_003978218
R00071	NP_001106271	NP_001072941	XP_002933933	NP_001082888	XP_003971134
R00072	NP_001091	NP_001026234	NP_989355	NP_001002066	XP_003962565
A00073	NP_079047	XP_003643576	NP_001120405	NP_001017632	XP_003977974
A00074	NP_775858	XP_426467	XP_002932445	NP_991201	XP_003977973
R00075	NP_001156768	XP_419403	NP_001025540	XP_001924048	XP_003964070
R00076	NP_000923	XP_425261	XP_002940270	NP_001116245	XP_003977980
R00077	NP_619634		NP_001016307	NP_001002692	XP_003966944
R00078	NP_001128680		NP_001107353	NP_001004677	XP_003974414
R00079	NP_001122084		NP_001039097	NP_001006069	XP_003970267
R00080	NP_005519		NP_001007515	NP_997842	XP_003970268
R00082	NP_004791	XP_416972	NP_001123760	NP_997893	XP_003970210
A00086	NP_861452	XP_418339	XP_002931604	XP_001337404	XP_003968905
R00088	NP_036215		XP_002934457	NP_571517	XP_003979210
A00089	NP_060167	XP_418338	NP_001005057	NP_954966	XP_003966187
A00090		XP_418337	XP_002934458	XP_688748	XP_003966188
R00093		XP_418336	XP_002934542	XP_002664951
A00095	NP_067080	NP_001026722	NP_001011196	NP_001012261	XP_003962477
R00096	NP_003125	NP_001006478	NP_001006889	NP_001028913	XP_003962478
R00097	NP_055549	XP_421180	NP_001016235	NP_001038220	XP_003971842
A00098	NP_001258436				XP_003976806
A00099	NP_001154970	XP_421181	XP_002935388	XP_003200432	XP_003976805
R00100	NP_060845	NP_001007934	NP_001008193	NP_001013558	XP_003976270
R00101	NP_004441	NP_001006475	XP_002935377	NP_571303
R00102	NP_006212		NP_001008110	NP_957042	XP_003972352
R00103	NP_001041706		NP_001119591	NP_957435	XP_003972353
R00106	NP_060173	XP_003643890	XP_002933934	XP_002664757	XP_003970678
A00107	NP_000944	NP_001076834	XP_002936956	NP_956929	XP_003966524
R00108	NP_005783	XP_414172	NP_001016703	NP_001003618	XP_003978795
A00109	NP_000653	NP_990671		XP_001334322
A00110	NP_055240	NP_989882			XP_003966195
A00113	NP_004736	XP_003641091	XP_002935195	XP_685805	XP_003971890
R00115	NP_065811	XP_421906	NP_001123750	XP_003197660	XP_003966596
A00116	NP_004217	NP_001026420	NP_001016460	NP_001071197	XP_003964841
R00119	NP_001866	NP_001039306		XP_683282	XP_003962079
R00120	NP_001130046	XP_418874	NP_001016046	NP_001009891	XP_003978368
R00121	NP_060547		NP_001123392	NP_956615
R00122	NP_058651	NP_001026329	NP_001004947	NP_956448	XP_003967028
R00125	NP_003093		NP_001106630	NP_001092706
A00126	NP_001349	NP_001026330	NP_001135571	NP_001108613	XP_003972003
R00128	NP_057425		XP_002937222	NP_001155125	XP_003961627
R00129	NP_071896	XP_421670	XP_002937223	NP_001002863	XP_003979225
A00130	NP_000789	XP_426351	XP_002937215	XP_692025	XP_003979597
A00133	NP_114426	XP_426278		NP_001038310
A00135	NP_060130	NP_001012570	NP_001016842	NP_998081	XP_003974062
A00136	NP_056144	XP_425908	NP_001015927	XP_001334031	XP_003974123
R00138	NP_001035958	XP_419851	NP_001016334	NP_001019604	XP_003970965
A00140	NP_001026913	XP_419848	XP_002938343	NP_991180	XP_003977362
A00144	NP_862820		NP_001096537	NP_997892	XP_003962542
R00145	NP_055205		NP_989183	NP_878285	NP_001027905
R00146	NP_061888	XP_423717	XP_002942593	XP_001337205	XP_003968132
A00147			NP_001072276
A00154	NP_742013	XP_001234476		XP_694642	XP_003967633
A00156	NP_001155244	XP_425806	XP_002932551	XP_700338	XP_003970970
R00158	NP_055429	NP_001006393	XP_002936960	NP_001177949	XP_003964150
R00159	NP_001032671	NP_990221	NP_001027500	NP_001018541	NP_001072045
A00161	NP_003384	XP_426508	XP_002936394	NP_571034	XP_003964062
R00162	NP_001070674	XP_003641542	XP_002936398	XP_001921581
R00163	NP_004995	NP_001006502	XP_002936399	NP_957149	XP_003961209
R00164	NP_060372	XP_426507	NP_988915	NP_958904	XP_003964063
A00165	NP_002075	NP_001156704	NP_001015740	NP_001004634	XP_003961210
A00169	NP_663719	XP_416913	XP_002934552	XP_001343426	XP_003962429
R00171	NP_391988	NP_001034343	NP_989160	NP_001030143	XP_003975943
A00172	NP_002202	NP_001034343	NP_989160	NP_001030143	XP_003979950
A00176			XP_002944716	XP_002664076	XP_003978214
A00177		XP_003642397
A00178	NP_001041	NP_001020005	XP_002935929	XP_695365	XP_003964699
A00179	NP_001041	NP_001025516	XP_002935929	XP_002665648	XP_003964699
R00180	NP_061184	NP_001025878	XP_002935935	XP_002661206	XP_003964419
R00181		NP_001025879	XP_002935936	XP_001922392
A00184	NP_006684	XP_414800	NP_001016803	NP_571084	XP_003979006
A00185	NP_036253	XP_001233620	NP_001037889	XP_003199689
A00186	NP_001138424	NP_989869	XP_002937635	XP_693332	XP_003964767
R00190	NP_055939	XP_003640385	XP_002932237	XP_002666878	XP_003976471
R00192	NP_036531	NP_001034355	NP_001072614	XP_002663601	XP_003974495
R00193	NP_002421		NP_001093672	XP_001919775	XP_003974522
R00194	NP_001672	NP_990222	NP_001072333	XP_697108	XP_003970855
A00195	NP_644814			XP_002662207
A00201		XP_420128			XP_003979246
R00202	NP_055553	XP_420127		XP_001335587	XP_003977024
R00203	NP_002077	NP_989742	NP_001008130	NP_998200	XP_003964378
R00204	NP_001119593	XP_420126	NP_001015953	NP_991278	XP_003964644
R00205	NP_001229430	XP_003642410	NP_001016440	NP_001013302	XP_003964609
R00206	NP_057055	NP_001026280	NP_001107402	NP_001028768	XP_003964610
A00208		NP_998741	NP_988852	NP_956095	XP_003967071
A00209	NP_057693	XP_418968	XP_002933703		XP_003969973
R00210	NP_001243111		XP_002933704	XP_002662990	XP_003969972
A00211	NP_003110	NP_001012545	XP_002933705	XP_001923118	XP_003969971
R00212	NP_000968	NP_990330	NP_989111	NP_937786	XP_003970021
R00216	NP_849193	NP_001026684	XP_002941861	NP_958866	XP_003965896
A00218				XP_002665019
R00220			XP_002940795
R00222	NP_001073978	NP_001006472	NP_001116919	NP_001038502	XP_003972844
A00230	NP_002843	NP_001017413	XP_002933289	XP_694358
A00232	NP_065728	NP_001025816	NP_001016962
R00233	NP_005708	NP_001026732	NP_001017242	NP_919359	XP_003978483
R00234	NP_005390	NP_001038127	NP_001106572	NP_001124105	XP_003975677
R00235	NP_055785	XP_422239	NP_001090875	NP_001004644	XP_003975551
A00236	NP_000698	NP_001026650	XP_002932869	XP_003198871	XP_003963133
A00237	NP_057386	XP_414437	NP_001008192	NP_001003996	XP_003973227
R00238	NP_036460	NP_001025906	NP_001116196	NP_001020355	XP_003972872
A00240	NP_476517		XP_002931511
R00241	NP_001167637	XP_415687	NP_989310	NP_001025143	XP_003964418
A00244	NP_056121	XP_422499	XP_002931653	XP_002665714	XP_003974004
A00250			XP_002934030
A00251	NP_005201	NP_001163998	XP_002934828	NP_001012390	XP_003961694
A00253	NP_005201	NP_001163998	XP_002934018	NP_001116783	XP_003961694
A00255	NP_002617			XP_698635	XP_003962034
R00258			NP_001120110
A00259	NP_001186826	XP_415029	NP_001090781	NP_001107133	XP_003971636
A00260			XP_002931794
A00262			XP_002937202	NP_001124110
A00266	NP_597707	XP_001231827	XP_002932472	NP_001108037	XP_003961497
A00267			XP_002932473
A00268	NP_112574	XP_413705	NP_001135593	XP_694757	XP_003969547
R00271	NP_001108488	XP_424220	NP_001121458	NP_001029348	XP_003976260
A00275	NP_000606	NP_001122300	NP_001090869	NP_571277	XP_003970972
A00278	NP_036499	XP_425669	XP_002941606	NP_001121876	XP_003979349
A00279	NP_115942	NP_001008464	XP_002940479	XP_001920897	XP_003970194
R00286	NP_443731	XP_421030	NP_989013	NP_001002364	XP_003967404
R00287	NP_002855	XP_416476	NP_001106498	XP_001921519	XP_003977064
A00288	NP_653271	XP_003642833	NP_001106498	XP_001921519	XP_003977064
A00292				XP_003200342
R00296	NP_003631	XP_001231708	NP_001123686	XP_689534	XP_003978794
A00297	NP_006677	XP_001236316	NP_989332	NP_571106	XP_003964470
R00298	NP_001182177	XP_429199	NP_991394	NP_999894	NP_001027825
R00299	NP_001530	NP_001012963	NP_001011012	XP_002666797	XP_003967491
R00301	NP_060695	NP_001007980	NP_989188	NP_956493	XP_003978154
A00303	NP_002188	NP_001025707	NP_001135643	NP_001030155	XP_003966778
R00304	NP_055129	NP_001180567	XP_002935717	XP_694124	XP_003962009
A00305				NP_001013591	XP_003970532
R00306	NP_858058	XP_001232519	NP_001019747	NP_001018116	XP_003970511
R00307	NP_004597	XP_420198	XP_002934954	NP_001038250	XP_003971272
A00312				NP_991125
R00314	NP_115766	XP_422088	NP_001005639	NP_775395	XP_003962223
R00327	NP_659495	XP_415115	NP_001072546	NP_001077319	XP_003974933
R00328	NP_065115		NP_001072815	NP_001038814
R00329	NP_060653	NP_001026640	XP_002935243	NP_001186845	XP_003965451
R00330	NP_001137377	NP_001239017		NP_001119948	XP_003975003
A00331	NP_073619	XP_415120			XP_003965450
A00334	NP_065896	XP_415122	NP_001135661	XP_003200103	XP_003975004
R00336	NP_078899	XP_415123	NP_001039211	NP_001073538	XP_003974693
R00339	NP_000882	NP_990701	XP_002935938	XP_001923086	XP_003961109
R00343	NP_002607	NP_989593	NP_001184158	NP_997604	XP_003966980
A00344	NP_001156971		NP_001121522
A00345	NP_079375	XP_416547		NP_001071213	XP_003978668
A00347	NP_002310	XP_422732		XP_003199053	XP_003966813
R00349	NP_001668	NP_990851	NP_001016488	NP_571746	XP_003977640
R00350	NP_037462	XP_003640505	NP_988903	NP_571004	XP_003973930
R00351	NP_003657	XP_416590	NP_001008041		XP_003969951
A00352	NP_067002	XP_416589	XP_002935828	NP_001122012	XP_003974311
R00357	NP_078960	XP_003640647	XP_002936587	NP_001018600	XP_003968269
R00358	NP_002885	XP_419158	XP_002934181
A00364	NP_116322	XP_419159
R00365	NP_003822	XP_419160	NP_001004996	NP_001003614	XP_003978000
R00366	NP_037458	XP_419161	NP_001096308	NP_001008621	XP_003977999
A00367	NP_000262	XP_419162	XP_002934172	NP_001230804	XP_003975414
A00381	NP_005029	XP_426283	NP_988984	NP_001002065	XP_003970636
R00382	NP_004444	NP_001026705	NP_001005631	NP_001004598	XP_003970635
R00383		XP_001233025	XP_002934785
A00387	NP_001391	XP_422305	NP_001072893	NP_571766	XP_003977555
R00388	NP_001391	XP_422305	NP_001072893	NP_571766	XP_003977555
R00389	NP_001189342	NP_989960	NP_001034827	NP_001017779	XP_003978454
R00391	NP_001070862	XP_422306	NP_001005058	NP_001007387	XP_003977554
A00395	NP_001069			NP_001077304
R00396	NP_060216	NP_001026179	NP_001135675	NP_997870	XP_003966194
R00400	NP_001193943	NP_990622	XP_002937290	NP_001103844	XP_003968301
R00401	NP_000996	NP_001026007	NP_989119	NP_957447	XP_003968267
A00402	NP_001138462	XP_426345	XP_002937286	XP_690801	XP_003966983
A00407	NP_002555	XP_425667	NP_989039	XP_700330	XP_003977125
A00410	NP_003480	XP_425538	NP_001090752	XP_001336737	XP_003976643
R00412	NP_001171714	NP_001034369	XP_002935211	NP_991298	XP_003975955
R00414	NP_037370	XP_417034	NP_001005145	NP_001003476	XP_003978296
R00422	NP_060933	XP_416486	NP_001120023	NP_001017908	XP_003972800
R00423	NP_060315	XP_420723	NP_001016404	NP_001071186	XP_003978635
R00427	NP_998885	XP_003642270	XP_002940705	NP_957078	XP_003968518
R00430	NP_077305	NP_001026943	NP_001011261	NP_001038676	XP_003979640
R00431	NP_065390	NP_001001472	NP_001004851	NP_955923	XP_003971506
R00432	NP_002782	XP_421242	NP_989113	NP_001002589	XP_003971508
R00438	NP_006409	NP_001035553	NP_001017043	XP_697855	XP_003962668
A00439	NP_006409	NP_001035553	NP_001017043	XP_697855	XP_003962666
A00440	NP_006409
R00441	NP_008971			XP_003198760	XP_003968727
R00442	NP_443080		NP_001016433	XP_001333116	XP_003964474
R00443	NP_000651	NP_990785	XP_002939433	NP_919367	XP_003971715
R00444	NP_085055	XP_414829	XP_002939434	NP_001002394	XP_003962607
A00445	NP_079169	XP_415014	NP_001090818	XP_001332100	XP_003962658
R00446	NP_064543	XP_003643513	XP_002939437	NP_001038817	XP_003968627
A00447	NP_000700	NP_001012562	NP_001090683	NP_001019590	XP_003968628
A00448	NP_006568	NP_001008457	NP_001123810	XP_001335117	XP_003968688
R00449	NP_001161339		XP_002939438	XP_002666586
R00453				NP_001122267
A00454	NP_065711	NP_989913	XP_002939290	XP_002666587	XP_003968790
A00455	NP_056525		XP_002939289	NP_001073415	XP_003968789
R00456	NP_055416	NP_001026211	NP_001025664	NP_956357	XP_003968629
A00457	NP_001136065	NP_001012606	NP_001017136	XP_001922368	XP_003962515
A00458					XP_003968810
R00459	NP_066930	XP_001233807	NP_001037988	XP_003200900	XP_003978760
A00460	NP_079183	XP_417650	NP_001072282	NP_001104672	XP_003963555
A00461		XP_416990		XP_001920549	XP_003969955
R00462	NP_005530	XP_421831	NP_001016205	NP_001032658	XP_003963669
A00464	NP_005031	XP_425654	NP_001072639	NP_001002694	XP_003968706
A00466	NP_003320		NP_001123670		XP_003978604
A00469		XP_421829	NP_001015859	NP_001012245	XP_003978419
A00470			XP_002943484
A00472		XP_420272
R00473	NP_060650	XP_003643213	NP_001072743	NP_001189401	XP_003965136
R00476	NP_659419	XP_416097	XP_002940218		XP_003967818
A00477	NP_113623		XP_002935845		XP_003977975
A00479	NP_060749	XP_416098	NP_001016079	NP_001002098	XP_003972726
R00480	NP_055814	XP_001233648	NP_001016319	NP_001070133	XP_003977203
R00481	NP_001139685	NP_001012827	NP_989223	NP_001166096	XP_003967817
A00482	NP_775489	NP_001001301	XP_002940217	NP_999960	NP_001027849
R00485	NP_689895	XP_001231979	NP_001007935	NP_001005985	XP_003966846
R00489	NP_001555		NP_001017044	NP_001002448	XP_003966845
R00490			XP_002934305
A00497	NP_002430	XP_003643127	XP_002942407	XP_003198705	XP_003975207
R00499	NP_002567	NP_001155844	XP_002938837	NP_958485	XP_003977035
A00502	NP_766627	XP_003640646	XP_002937293	XP_001921668	XP_003968270
R00503	NP_115729	XP_003642862	NP_001016078	NP_001082831	XP_003961051
R00506	NP_001035521	XP_001234221	NP_001165768	NP_001108388	XP_003961052
R00508	NP_003757	NP_001006332	NP_001029112	NP_957166	NP_001032963
R00509	NP_005780	NP_001012568	NP_001096200	NP_571451	XP_003961088
A00510	NP_003725	XP_425868	NP_001025584	NP_001013573	XP_003964455
A00512	NP_001129514	XP_001235322		NP_001003572	XP_003961523
R00513	NP_775102	XP_418133	XP_002943247	XP_003198160	XP_003965057
R00514	NP_000979	NP_990668	NP_001016180	NP_956018	XP_003965058
R00515	NP_005524	XP_418132		XP_688060	XP_003965071
R00517					XP_003964946
R00518	NP_006364	XP_418130	XP_002932557	NP_001007052	XP_003961306
R00519	NP_005431	NP_001239052	NP_001004920	NP_001038829	XP_003964859
R00523	NP_001132972	NP_001001743	NP_001072569	NP_001007400	XP_003970212
A00525	NP_001028229	XP_003642069	XP_002939395	NP_001007064	XP_003973553
A00526	NP_891550	XP_414417	XP_002932868	NP_001244125	XP_003973554
R00528	NP_060282	XP_416646	NP_001004897	NP_999969	XP_003972921
A00534	NP_004165	XP_418895	XP_002931737	NP_001106944	XP_003969281
R00542	NP_005915	NP_001005427	NP_001116898	XP_684924	XP_003977747
R00551	NP_612398	XP_423859		NP_001082947	XP_003972212
R00553	NP_057615	XP_427367	XP_002938694
A00556	NP_143026	NP_001076830	XP_002938089		XP_003966894
R00557	NP_150287	XP_421178	XP_002936933	NP_001116728	XP_003962416
R00559	NP_001027539	XP_421130	XP_002939591	NP_998317	XP_003962476
R00561	NP_001070736	NP_001186581	NP_001116959	NP_001002412	XP_003962632
R00562	NP_060633	NP_001254504	NP_001017233	NP_956540	XP_003962640
R00563	NP_006770	XP_003643454	NP_001096389
R00564	NP_005249	NP_001186451	NP_998880	NP_957056	XP_003962482
A00565	NP_060615	XP_420936	NP_001123398	NP_001076519	XP_003977363
R00571	NP_620584	XP_415261	NP_988942	NP_001015068	XP_003979622
A00573	NP_001074002	XP_415263	NP_001016815	NP_997952	XP_003973622
A00574	NP_055545	XP_415264	XP_002932126	NP_001107090	XP_003974786
A00575	NP_112482	XP_001233509	NP_001107737	NP_001025439	XP_003965540
R00577	NP_057002	XP_415266	XP_002932150	NP_001013566	XP_003974784
R00578	NP_055683	XP_415267	NP_989388	NP_001116727	XP_003974626
R00581	NP_542408	XP_415908	NP_001005077	NP_001025171	XP_003968584
R00582	NP_003760	NP_001107213	NP_001004795	NP_998064	XP_003968583
R00583	NP_057483	XP_429464	NP_001016268	NP_001153292	XP_003976692
R00584	NP_004364	XP_415270	NP_001016543	NP_001005592	XP_003974636
R00586	NP_003702	XP_424730	NP_001011077	XP_697507	XP_003965275
R00588	NP_036602	XP_423940	XP_002931906	NP_957381	XP_003978976
A00590	NP_001229381	XP_417990	NP_001025493	NP_956892	XP_003973298
R00593	NP_954661	NP_001008458	NP_001005716	NP_001017777	XP_003962328
R00594	NP_071411	XP_419471	NP_001011336	NP_001002117	XP_003962327
R00599	NP_056207	XP_001233959	XP_002942016	NP_001122255	XP_003965651
R00602	NP_056265	NP_996875	NP_998876	NP_001232889
A00609	NP_001248339	XP_422334	NP_001090734	NP_001107092	XP_003972399
A00610	NP_001157945	XP_422335	NP_001072662	NP_001007404	XP_003964808
A00611	NP_001929	NP_001008478	NP_001039251	NP_001070782	XP_003978441
A00612		NP_001025857			XP_003972426
R00616	NP_000954	NP_001161190
A00618	NP_001138888		NP_001037942	NP_001074155	XP_003966433
R00619	NP_612462	XP_422470	NP_001005621	NP_001002679	XP_003966411
R00621	NP_001106177	NP_990265	XP_002939059	NP_835232	XP_003975752
A00622	NP_031384	NP_989839	NP_001017339	NP_001038729	XP_003975775
R00626		XP_429703
A00629	NP_114144	XP_417929	XP_002942801	XP_002662060	XP_003971294
A00630	NP_001230140	NP_989939	XP_002942520
R00632	NP_001230140
R00633	NP_002993	NP_001006321	NP_989357	NP_001004004	XP_003977072
R00634	NP_036591	XP_420185	NP_001017099	NP_001122251	XP_003977071
A00635				NP_001232912
A00636				NP_001093525
A00637				NP_001245154	XP_003965015
R00638	NP_001023	XP_001235087	NP_001016766	NP_998118	XP_003971649
R00639	NP_689542	XP_421455	NP_989278	NP_996968	XP_003962530
A00640			NP_001072474
A00641	NP_002683	NP_001006493	NP_001025641	NP_775353	XP_003962556
R00642	NP_751943	XP_421458		NP_001082949	XP_003962787
R00643	NP_055130	NP_001012608		NP_001082949	XP_003962786
R00644	NP_004704	NP_001239258	XP_002938173	NP_001070202	XP_003962785
A00650		XP_423678	NP_001011176
A00651	NP_775787	XP_426152
R00652	NP_054880	XP_419623	NP_989288	NP_001070798	XP_003970431
A00653	NP_000058	XP_415218	XP_002934946		XP_003969961
A00657				XP_001331921
A00669	NP_003091	NP_001012625	XP_002931761	NP_001032787	XP_003974741
R00670	NP_054754	NP_001095119	NP_001016125	NP_001028903	XP_003965624
R00671	NP_000934	XP_001231333		NP_998184	XP_003974740
A00673	NP_065982
R00675	NP_005473	NP_001026449	NP_001072709	NP_001002149	XP_003975510
A00676					XP_003975509
R00679	NP_056349	XP_422390	XP_002939690	NP_001093497	XP_003975508
R00682	NP_963920
R00683	NP_940951	XP_001234741		NP_001006090	XP_003965339
A00685	NP_001230182		XP_002941279
A00686	NP_982354	XP_003640607	XP_002931976	XP_001343511	XP_003969935
R00687	NP_775767	XP_418583	NP_001106472	NP_571051	XP_003977142
A00693	NP_000283	XP_416811	XP_002936102	XP_684044	XP_003969910
R00694	NP_003907	NP_001006261	NP_001039110	NP_001082809	XP_003973885
A00696	NP_065716	XP_416821	XP_002938294	NP_001132930	XP_003973961
A00698	NP_002332	NP_001019749	NP_001107163	NP_998024	NP_001033074
R00700	NP_004869	NP_001181912	NP_001107136	NP_001014828	XP_003965344
R00701	NP_001279		NP_988889	NP_997847	XP_003979662
A00702	NP_002432	XP_003643127	XP_002939511		XP_003966181
R00705	NP_055174	NP_989804	NP_001016499	NP_001003583	XP_003972900
A00707		XP_001232096	XP_002931553
A00711	NP_004422	XP_001234814	NP_001006765	NP_571490	XP_003963001
R00713	NP_079484	XP_417172	XP_002934980	XP_003200146	XP_003968370
A00715			XP_002938501		XP_003965958
R00716	NP_055833	XP_419863	NP_001120504	XP_003200263	XP_003965957
R00719	NP_219479	XP_419861	NP_001106449	NP_001068583	XP_003968719
A00722	NP_995581	XP_425669	XP_002941606	XP_003200054	XP_003962131
A00723	NP_001004707	XP_425056	XP_002941606	XP_003200054	XP_003962131
A00724	NP_001005185	XP_425669	XP_002941606	XP_003200054	XP_003962131
A00727				XP_003198677
R00728	NP_055899	XP_424803	XP_002934866	NP_001003778	XP_003974922
R00729	NP_079030	XP_424804	XP_002934867	NP_001017612	XP_003965348
R00730	NP_115551	NP_001012624	NP_001011103	NP_955998	XP_003975203
R00731	NP_078817	XP_421719	XP_002940615	NP_956913	XP_003978778
R00732	NP_079023	XP_001233664	XP_002940614		XP_003964178
A00733	NP_001139324	XP_003641300	NP_001243219	NP_001108615	NP_001233227
A00734	NP_116279	XP_419396	XP_002940743	NP_997965	XP_003971423
A00738	NP_001119	NP_001006132	XP_002933729	NP_955976	XP_003970026
R00739	NP_000248	NP_989918	XP_002939061	NP_001106204	XP_003975582
R00744				XP_003200166
R00751	NP_003477	NP_001025750	NP_001135465	NP_001121830	XP_003977789
A00753	NP_009151	XP_414195	NP_001039155	NP_001104671	XP_003969961
A00756		NP_001167017
R00758	NP_000272	NP_990236	NP_001011016	NP_957108	XP_003963732
A00759	NP_003892	NP_001007947	XP_002943540	NP_001082938	XP_003963731
A00762	NP_000244	NP_001103254	XP_002934813	NP_998135
A00763	NP_000340	NP_990017	XP_002932770	NP_571738	XP_003961286
A00764	NP_542453	XP_003641522			XP_003961285
A00765			XP_002932216
R00766		XP_001231650	XP_002932194	NP_998654	XP_003975713
R00767	NP_001096062	XP_426611	NP_001153012	NP_001017842	XP_003974427
R00768	NP_001010883	XP_001232083	NP_001016771	NP_001038309	XP_003974410
R00771	NP_009037	NP_001012847	NP_001107740	NP_997851	XP_003970224
R00775	NP_001073884	XP_422593	NP_001135684	NP_001184003	XP_003968074
R00776	NP_036614	XP_003641713	XP_002935748	NP_001012505	XP_003964958
R00783	NP_055947	NP_001103225	XP_002933347	XP_003200556	XP_003969438
A00786	NP_006334	NP_990319	XP_002940444		XP_003964258
R00788	NP_001389		NP_001005704	NP_001006068	XP_003968835
R00790	NP_001524	XP_414998	NP_001093751	NP_957393	XP_003968770
R00791	NP_001748	NP_001025966	NP_001011190	NP_919360	XP_003963969
A00792	NP_001654	NP_001075174	NP_001006797	NP_001154847	XP_003962513
R00794	NP_001030024	XP_001231761	NP_001120579	NP_001188322	XP_003963751
A00795			NP_001072256		XP_003968462
A00796	NP_057205	XP_419418	XP_002938848	XP_001920935	XP_003976604
R00797	NP_064632	NP_001186342	XP_002938863	XP_001336310	XP_003978940
R00799	NP_003482	XP_422177	NP_001007497	NP_998499	XP_003963135
R00800	NP_060353		NP_001008050	NP_001018867	XP_003963591
A00801	NP_689885	XP_422726		XP_001339451
R00802	NP_001131077	XP_416460	XP_002942486	NP_001083007	XP_003967673
A00805			XP_002934254	NP_001129959	XP_003974842
A00808	NP_079455
R00812	NP_006203	XP_417979	NP_001123395	XP_001919792	XP_003973073
A00813	NP_061036	NP_001026670	XP_002932168	NP_001017716	XP_003973046
A00816	NP_065684	XP_426167	XP_002933578	NP_001124140
A00817	NP_065684		XP_002933578	NP_001124140
A00821	NP_776255		XP_002933578	NP_001124140
A00822	NP_061194	XP_425824	NP_001165400	NP_001076424	XP_003973744
A00823	NP_000563	NP_001004414	NP_001165400	NP_001018621	XP_003973743
R00824	NP_116584	XP_417976	NP_001017347	NP_958460	XP_003973742
R00826	NP_055971	XP_426467	NP_001039133	NP_001073510	XP_003972311
R00827	NP_689539	XP_421377	NP_001096216	NP_001007295	XP_003977367
R00828	NP_055659	XP_421376	XP_002936632	NP_001038644	XP_003962859
R00829	NP_116019	XP_421375	XP_002936625	NP_001189413	XP_003962858
A00830		XP_421374		XP_695258
A00831	NP_055041	XP_426466	NP_001072631		XP_003962784
A00832	NP_835230	NP_001008679	XP_002933662	XP_694859	XP_003961716
R00841	NP_001028216	XP_003642300	NP_989297	NP_878286	XP_003978943
R00845	NP_002240	NP_990129	NP_001072484	XP_001921794	XP_003965618
R00846	NP_065914	XP_418429	NP_001073041	XP_694698	XP_003966080
R00849	NP_064507	XP_428553	NP_001116279	NP_957246	XP_003976291
R00853	NP_659499	XP_419771	NP_001017224	NP_001076474	XP_003965788
R00856	NP_001185797	NP_001038137	NP_001013632	NP_998624	XP_003978101
R00864	NP_001123478	NP_001129149	NP_001015805	NP_942101	XP_003971702
R00866	NP_001171182	XP_418760	NP_001090632	NP_001070184	XP_003969377
R00868	NP_604390	NP_001106671	NP_001072488	NP_001032892
R00869	NP_004963	NP_001025709	NP_001090634	NP_571162	XP_003975166
R00872	NP_996563	XP_417126	XP_002941581	NP_001017840	XP_003966901
A00876	NP_443714	NP_001103409	NP_001016575	NP_001017622	XP_003967056
A00877	NP_002759	NP_001020611	NP_001135608	NP_956857	XP_003967038
A00880	NP_056232	XP_423842	XP_002936340	NP_956821	XP_003964202
A00881	NP_001100	XP_421552	NP_001120446	NP_956931	XP_003964201
R00883	NP_006650	NP_001006496	XP_002940353	NP_956416	XP_003961119
A00887	NP_057657	XP_423689	NP_001004948	XP_694162	XP_003967893
A00888	NP_612463	XP_423688	XP_002935469	XP_002664792	XP_003972163
A00890		XP_428548
R00892	NP_003590	NP_001026273	NP_989043	NP_001002625	XP_003963890
R00893					XP_003979182
A00894		XP_416491	XP_002943994	XP_001334811	XP_003979571
A00897			XP_002940850	XP_001332817	XP_003978961
A00898			XP_002940951
A00903	NP_000124	NP_989674	NP_001011223	NP_001035400	NP_001027784
A00904	NP_001165347	XP_420239	XP_002932674	XP_685307	XP_003970233
A00905	NP_775965	XP_420240	XP_002932642	XP_002664465	XP_003970234
A00906	NP_443091	NP_001136344	NP_001072828	XP_688354	XP_003973225
R00907	NP_006245	NP_001006133	XP_002934267	NP_999873	XP_003973226
A00908	NP_004558	XP_003642010			XP_003973516
R00909	NP_056442	XP_417736	NP_001017114	XP_003200738	XP_003971742
A00910	NP_056146	NP_001004413	NP_001123711	NP_001009556	XP_003978286
R00911	NP_004362	NP_001026576	NP_001121466	NP_001001941	XP_003978283
A00912	NP_002848		NP_001120089	NP_001017399	XP_003978284
R00913	NP_056541	XP_426809	NP_001016610	XP_001346262	XP_003975477
R00914	NP_003759		NP_001120300	XP_683349	XP_003977883
R00917	NP_055841	NP_001186534	XP_002931665	XP_002666807	XP_003967530
A00923	NP_057315	XP_415915	NP_001116917	NP_001106957	NP_001027920
R00924	NP_612423	NP_001026469	NP_001120013	NP_001005986	XP_003976464
R00925	NP_001296	XP_003642430	NP_001005709	NP_571838	XP_003971034
A00926				NP_571840
A00928				XP_003199364
A00929	NP_004298	XP_420735	NP_001116923		XP_003968613
A00930				NP_001017910	XP_003965735
R00931	NP_000604	XP_417267	XP_002944396	NP_001104617	NP_001027761
A00932	NP_065122	XP_425214	XP_002941234	NP_001025337	XP_003971275
A00946				XP_696619
A00949	NP_002419	XP_417326	NP_001015921	XP_002662954	XP_003969448
R00951	NP_078874		NP_001120615	NP_001003460	XP_003977804
A00952	NP_065858	XP_003641935	XP_002931702	XP_001923338	XP_003969782
R00953	NP_054876	XP_001231696	XP_002931703	NP_001006061	XP_003967589
A00954	NP_001887	NP_001012709		XP_684260	XP_003977792
A00955	NP_001240652	NP_989826	XP_002942399	NP_001018159	XP_003962313
R00957	NP_060244	XP_418914	NP_989194	NP_956921	XP_003966068
A00975				XP_707530
R00982	NP_009045	XP_423749	NP_001008104	NP_001003522	XP_003973507
R00983	NP_003959	XP_003642074	NP_001116198	NP_998632	XP_003963501
R00985			NP_001072680	XP_003201226	XP_003963545
R00998	NP_031396	XP_003642280	NP_001011112	NP_001003862	XP_003975149
R00999	NP_061109	XP_415313	NP_001120198	NP_955927	NP_001027919
A01000			NP_001039056
R01002	NP_057365	NP_001012541	NP_001116260	XP_001922665	XP_003975147
R01005	NP_056250	XP_418362	NP_001116899	XP_686250	XP_003965920
R01007	NP_005025	XP_001234883	NP_001016509	NP_001186035	XP_003968894
A01010	NP_599030	NP_001008786	NP_001006870	NP_694484	XP_003964541
R01011	NP_057103	NP_001025926	NP_001016024	NP_001002116	XP_003961512
A01012	NP_065904	NP_001012830	XP_002932210	NP_996936	XP_003961362
A01013	NP_001193771	XP_001233255	XP_002932209	NP_001035065	XP_003965020
R01020	NP_060790	XP_417284	NP_989290	XP_002666132	XP_003971176
A01023			XP_002936256	NP_001153485
A01029	NP_001182412	XP_003641672		NP_001121749	XP_003962073
R01030	NP_068799	XP_422106	XP_002942640	NP_001073649	XP_003962061
R01034	NP_003233	XP_422108	XP_002941621	XP_688938	XP_003969323
R01035	NP_073613	XP_422109	NP_001025662	XP_689013	XP_003966617
R01036	NP_005267	XP_422110	NP_001006808	NP_999918	XP_003963492
A01037	NP_001129521	XP_422111		XP_689096	XP_003978316
A01038	NP_060024	XP_422113		NP_001107919	XP_003977273
A01039	NP_001139575	XP_422116	NP_001120163	XP_001340167	XP_003962141
A01040	NP_001028202	XP_422117	NP_001011186	NP_001002583	XP_003962142
A01041	NP_077817	XP_426601	NP_001039087	NP_001108048	XP_003966453
R01045	NP_005853	XP_422558	NP_001121432	XP_692954	XP_003970594
A01052	NP_001166934	XP_415936	NP_001182593	XP_001920258	XP_003967834
R01055	NP_705898	NP_001186389	XP_002932240	NP_001116758	XP_003977587
A01057		XP_003640792
R01066	NP_001128123	XP_003642075	NP_001016049	NP_001004589	XP_003973808
A01067	NP_061842	XP_003642076	XP_002941014	NP_001107906	XP_003973809
R01069	NP_068733	NP_001004406	NP_001011156	NP_991263	XP_003962844
R01070	NP_115692		NP_001008091	NP_001003610	XP_003979343
R01071	NP_000472	NP_990119	XP_002936519	NP_001006021	XP_003963076
A01073	NP_001167571	XP_419049	XP_002932078	NP_998282	XP_003963391
R01074	NP_001035292	XP_001233721	NP_001016135	NP_957004	XP_003974709
R01077	NP_000252	XP_422235	XP_002934195	NP_001015062	XP_003974014
R01081	NP_000151	NP_001094505	XP_002932473	XP_691434	XP_003964779
R01082	NP_001073938	NP_001026384	NP_001106476	NP_001076300	XP_003978939
A01083	NP_036545	XP_419527	NP_001017245	NP_001038418	XP_003968446
R01086	NP_004588	XP_414380	NP_001005128	NP_001017582	XP_003968345
A01087	NP_000666	XP_425280	XP_002932678	NP_001035125	XP_003973684
A01090	NP_005619	XP_001232900	NP_001008127	NP_001177684	XP_003979887
R01091	NP_000421	NP_989655	NP_991399	NP_958502	XP_003968423
A01092	NP_056044	XP_415920	NP_001072577	NP_001071028	XP_003968524
A01096	NP_777563			XP_001343919	XP_003964630
R01097	NP_006444	NP_001006166	NP_001017314	NP_001007403	XP_003964631
A01098		XP_414847		NP_001071052
R01100	NP_001193576			NP_001038448	XP_003967827
A01102	NP_065697	XP_001232099
R01103	NP_065695	XP_420984		NP_956026	XP_003970054
A01104					XP_003972820
A01105	NP_066025	XP_416453	NP_001072502	NP_001014813	XP_003970010
R01107					XP_003970011
R01109	NP_055827	NP_001008469	NP_001016955	NP_001073456	XP_003970056
R01110	NP_006382	XP_003641442	NP_001128290	NP_957199	XP_003970012
R01111	NP_003433	XP_426401	NP_001025654	NP_957273	NP_001027837
A01121	NP_115991		XP_002940363	NP_997984	XP_003971431
A01122	NP_001164265	XP_419833	XP_002940359		XP_003979306
R01126	NP_694580	NP_001182523	NP_001120119	XP_696087	XP_003975440
R01127	NP_003179	XP_419832		NP_001018586	XP_003971410
R01132	NP_002936	NP_001006221	NP_001015732	NP_956105	XP_003968567
R01133	NP_443160	NP_001025886	NP_001072288	NP_001070062	XP_003971125
R01134	NP_002606	NP_001244218	NP_989086	NP_001004539	XP_003975968
A01135	NP_001157281	XP_415806	XP_002937192	XP_002664681	XP_003968565
A01136	NP_937790		XP_002936096	XP_689131	XP_003968537
A01143	NP_001128582	XP_414967	NP_001120377	NP_958470	XP_003964717
R01144	NP_001120676	XP_414960	NP_001072640	NP_001096609	XP_003964694
R01145	NP_001172006	XP_416182	NP_001007516	NP_957451	XP_003964507
R01149	NP_110396	NP_001026731	NP_001011207	XP_003199111	XP_003974029
A01152			XP_002938223
R01155	NP_067075	NP_001006355	NP_001017281	NP_001003449	XP_003979946
R01156	NP_055078	NP_001026683	XP_002933186	NP_001082983	XP_003968185
A01157	NP_001165774		NP_001120546	NP_001003609
R01158	NP_001035938	NP_001006356	NP_001008180		XP_003968199
R01161	NP_001012770	XP_001233813	NP_001007488	NP_001070175	XP_003968184
A01162	NP_055132	XP_418592	NP_001072229	NP_001017656	XP_003968183
A01164	NP_061916	NP_001006357	NP_001096403	NP_956928	XP_003968182
A01168	NP_001243677		XP_002936295	NP_001035467	XP_003963392
A01170	NP_001225	NP_989701	NP_001096351	NP_991301	XP_003973264
A01178			XP_002941339
R01180	NP_000593	NP_001077389	XP_002941247	NP_001108031	XP_003966820
R01181	NP_001274	NP_001006261	NP_989338	NP_991121	XP_003966804
A01182				XP_003198998
R01187	NP_001008493			NP_991196
A01188	NP_006723	NP_990839	XP_002932681		XP_003968467
R01189		XP_001235197		NP_001038520	XP_003970772
A01191			NP_001039124	NP_001014342	XP_003968687
R01192	NP_000391		NP_001008131	NP_957220	XP_003968746
A01193				NP_001070646	XP_003968762
R01196	NP_001815	NP_990838	NP_989374	NP_775329	XP_003971451
A01197	NP_001186796	XP_001234619	XP_002939773	XP_699946	XP_003968743
A01198			XP_002941327
A01200	NP_002930	NP_001006473
A01201	NP_002930	NP_001006473
R01209		XP_420975			NP_001027912
A01212	NP_001008409	XP_003642515	XP_002942109	NP_001243693	XP_003963291
A01213	NP_110442	XP_001235076	NP_001015688	NP_001017757	XP_003973053
A01215	NP_001011718	XP_001235083	NP_001027478	NP_001012252	NP_001027880
R01216			XP_002943267
R01217	NP_116253	XP_001234245	NP_001017140	NP_001003483	XP_003976585
A01218	NP_001177747	NP_001026457	NP_001039194	NP_956227	XP_003976591
R01219	NP_115825	XP_001235393	XP_002931501	XP_692169	XP_003972110
A01226					XP_003977501
R01228	NP_005968	XP_417129			XP_003968007
A01230		NP_989658	XP_002936821	NP_001107062
A01232		NP_990366
R01239	NP_066011	NP_001025857	NP_001120401	NP_001073515	XP_003972426
R01240	NP_055101	NP_990708	NP_988973	NP_001018350	XP_003974547
A01243			XP_002936229
R01246	NP_000041	NP_001013413	NP_001011212	NP_001004603	XP_003965426
A01250	NP_003925	NP_001006199	NP_001090834	NP_001007777	XP_003974667
A01251	NP_067632	XP_415465	NP_001072898	NP_001007458	XP_003965427
R01253	NP_001005336	XP_003642307	NP_001011076	NP_001243747	XP_003965514
R01254	NP_004477	XP_425338	XP_002935553	NP_001120806	XP_003965513
A01258	NP_444509	XP_001233100	XP_002933631	NP_001020721	XP_003971737
A01259	NP_001025006	NP_001184073	XP_002941370	NP_001002315	XP_003971738
A01260		XP_420037	NP_001029115	XP_003200349	NP_001027884
A01262	NP_002098	NP_990627	NP_001005101	NP_001017599	XP_003961353
A01265	NP_001035055	NP_001155877	NP_001107725	NP_001122195	XP_003964822
R01267	NP_689830	XP_001233498	NP_001119969
A01273		NP_001038104
A01275		XP_003642479		XP_691388	XP_003970319
R01277	NP_116243	XP_003642455	NP_001164994		XP_003971119
R01279	NP_060450	XP_003641806	NP_001135570	NP_001019560	XP_003962080
A01280	NP_001154887	XP_001231870	XP_002936658	XP_002662495	XP_003973923
A01281		NP_990250		XP_001336546	XP_003975655
A01285	NP_060114	NP_001026475	NP_001072337	NP_956734	XP_003975653
R01287	NP_001139400	NP_001026472	NP_001106500	NP_001243552	XP_003973921
R01288	NP_001186069	XP_422577	XP_002936652	NP_956875
R01289	NP_004796	XP_422576	NP_001016248	NP_001002317	XP_003968833
R01290	NP_060853	XP_422575		NP_001181857
A01291	NP_116129		NP_001037983	NP_001157467	XP_003976241
A01292				XP_001341839
A01293	NP_775841	NP_001012837	XP_002939692	NP_001003757	XP_003967972
A01295		XP_416574			XP_003968001
R01299	NP_057709		NP_001016318
R01302	NP_079272	XP_001233639	XP_002933285	NP_001073463	XP_003968461
A01303	NP_064554	XP_001233654	XP_002933286	NP_001008596
A01304	NP_996846	NP_989865	NP_001121446	NP_001008596
R01305	NP_612454	XP_001232514	NP_001096524	NP_001073488	XP_003964823
R01309	NP_061119	XP_421598	NP_001006925	NP_001020673	XP_003971070
R01310	NP_001185625	XP_421597	NP_001135491	NP_001186939	XP_003976167
A01312	NP_060354			NP_001013283
A01313		XP_420039		NP_998410	XP_003971710
A01314	NP_056273	NP_001026272	NP_001072833	NP_001038535	XP_003971709
A01320	NP_004254	XP_413950	XP_002932285	NP_001121824	XP_003967079
R01321		XP_003640925		XP_003198996
R01322	NP_001135906	XP_427980		XP_003198995	XP_003966886
A01328	NP_003647	XP_414388	NP_001016269	XP_001333925
R01329	NP_113643	XP_003640381	NP_001025590	NP_001018406	XP_003973678
A01331			XP_002943190
A01337	NP_036377	XP_421294	NP_001017145	NP_001002864	XP_003971556
R01338	NP_112487	XP_001235249	XP_002938905	XP_002665211	XP_003978638
R01339	NP_006011	NP_001026723		NP_001018527	XP_003978645
A01342			XP_002932538
R01343				XP_002667026
R01344	NP_001254739	NP_001026019	NP_001006884	NP_957238	XP_003979039
A01346	NP_006681		XP_002942325	XP_699803	XP_003975412
R01349	NP_079351	NP_001091708	NP_989103	NP_001003429	XP_003973511
A01350	NP_689963
R01351	NP_001098117	NP_001007961	XP_002941237	NP_001002667	XP_003975727
A01357	NP_003628	XP_413930	XP_002932992	XP_003200204	XP_003966325
R01359	NP_006090	NP_001026627	NP_001116890	XP_692921	XP_003967505
R01360	NP_001012776		XP_002939549	NP_001025274	XP_003965834
R01361	NP_006459		XP_002939548	NP_956526	XP_003966326
A01362	NP_055270	NP_001006338	NP_001135621	NP_001073542	XP_003966300
R01363	NP_001530	XP_413746	NP_001011012	XP_002666797	XP_003967491
A01364	NP_001243503	XP_424790	XP_002934870	XP_687500	XP_003965305
R01366	NP_000512	XP_424791	NP_001120459	NP_001108317	XP_003965306
A01368				XP_003198142
R01370	NP_115677		NP_001120410	XP_002661149	XP_003964654
A01371	NP_001248364			NP_001035398
R01372			XP_002939412
A01373			XP_002937892	XP_690252
R01376	NP_001037850	XP_421939	NP_001017010	NP_001004636	XP_003966737
R01381	NP_003371	XP_418091	XP_002932207		XP_003971683
A01383		NP_001006411	XP_002932188	NP_001186943	XP_003965953
R01384	NP_001073950	XP_416693		XP_692456	XP_003965952
A01385	NP_001239264	XP_413790		XP_003199047	XP_003970087
R01386	NP_060521	XP_418555	XP_002935224	XP_002662902
R01388	NP_006397	XP_001234000	NP_001006812	NP_001082894
R01389	NP_001032248	NP_001012841	NP_001120589	NP_001018580	XP_003968244
R01390	NP_002961	NP_989517	NP_001007997	NP_001025370	XP_003968235
R01391	NP_077027	XP_416798	NP_001107715	NP_001032192	XP_003976564
A01392	NP_689974		XP_002935235	XP_001338144
R01393	NP_085127	NP_001137142	XP_002935246	NP_001003580	XP_003968234
R01395	NP_009049	XP_419004	NP_001123393	NP_001097996	XP_003969060
R01396	NP_056340	XP_419865	XP_002938503	XP_003200174	XP_003965960
A01403	NP_001863	XP_417046	NP_001025617	NP_001018539	XP_003966478
A01404	NP_002289	NP_001008440	NP_001015721	NP_571395	XP_003971153
A01409	NP_795362		NP_001165487	NP_001034919	XP_003973313
A01411	NP_795363		NP_001165498	NP_001034919
A01413	NP_055489	NP_001006143	NP_989397	NP_957483	XP_003973373
R01414	NP_060654	XP_414440	NP_001190182	NP_991129	XP_003973726
R01415	NP_003661	XP_414439	XP_002938358	NP_997844	XP_003973727
A01416	NP_001093422	NP_001167530	XP_002938363	XP_001921194	XP_003973196
A01419	NP_001158147	XP_003642070	NP_001016416	NP_001035430	XP_003973197
R01420			NP_001107735	NP_001107072	XP_003973774
A01422	NP_065924	NP_001091008	XP_002938357	NP_001124166	XP_003973733
A01427	NP_001094060	XP_420806	XP_002938305		XP_003966782
R01429		XP_003641303
R01430	NP_003124	NP_001091005	NP_001016786	NP_957390	XP_003977499
R01432	NP_000111	XP_419386	NP_001121449	NP_957362	XP_003964278
R01433	NP_055513	XP_419384	NP_001072343	XP_002664275	XP_003964270
A01441					XP_003970784
A01444	NP_001184037			NP_001017906
R01446		XP_422818		XP_001345583
R01447	NP_001161686		XP_002933299
A01452		XP_003641724
A01454	NP_001131141			XP_694139
A01455	NP_000968	NP_990330	NP_989111	NP_937786	XP_003970021
R01457	NP_116000	XP_001231579	NP_001135480	NP_998346	XP_003966081
A01459	NP_057731		NP_001119977	NP_001116101	XP_003975531
R01465	NP_057191	XP_424997	NP_001011177	NP_955852	XP_003974645
A01467	NP_001257513	XP_421878	XP_002932048	NP_001073437	XP_003974316
A01468	NP_997721	XP_421879	XP_002932066	XP_001332328	XP_003975325
A01469	NP_001476	NP_990399	NP_001011472	NP_694496	XP_003966631
A01470	NP_001032208	XP_421880	XP_002932044	XP_001921526	XP_003975326
A01471	NP_001938	NP_989685	XP_002935558	NP_956068	XP_003973464
R01473	NP_006297	NP_989847	XP_002935560	NP_997975	XP_003963131
A01474			XP_002942916	XP_003201532	XP_003978985
A01475				XP_001337104
A01477				NP_001077285	XP_003978935
R01480	NP_110422	XP_420017	NP_001072489	NP_998566	XP_003971407
A01482	NP_741983	XP_001234476		XP_001343369	XP_003972822
R01485	NP_057215	NP_001026268	NP_001090677	NP_001002566	XP_003971960
A01487	NP_006593	XP_001234727	XP_002943245
R01489	NP_001180299
R01490	NP_060366	NP_001007872	XP_002944197	XP_001923710	XP_003963580
A01491	NP_071365		XP_002944466		XP_003963609
A01497	NP_001864	XP_420392	NP_001106417	NP_999975	XP_003972473
A01499	NP_006736	NP_001006438	NP_001072809	NP_998518	XP_003972472
R01500	NP_009177	XP_420390	XP_002934798	XP_696369	XP_003972526
A01501	NP_001093859	XP_420389	NP_001016373	NP_001095863	XP_003972519
R01507	NP_065166		XP_002933232	NP_001082833	XP_003977848
A01508	NP_076939	XP_417379	NP_001072239	XP_687373	XP_003977849
A01510	NP_056970	XP_003642528	XP_002933230	NP_001153449	XP_003977400
R01512	NP_002208	XP_414253	NP_001039260	NP_001018424	XP_003973631
R01513	NP_938074	XP_423669	NP_001005629	NP_956944	XP_003976091
R01515	NP_076986	NP_001186344	NP_001006771	NP_001189406	XP_003977916
A01516	NP_065770		XP_002940281
R01518	NP_036382	NP_001006466	NP_001107720	NP_001005931	XP_003970009
R01520			XP_002940283
A01521	NP_001562	NP_990703	XP_002940288	NP_001137376	XP_003961331
R01523	NP_068751	NP_001026345	NP_989159	NP_001005588	XP_003976046
R01524	NP_004307	NP_989743	XP_002940290	NP_571294	XP_003979728
R01526	NP_001257889		NP_989029	NP_001007435	XP_003966440
R01527	NP_001186600		NP_989389	XP_691138	XP_003966417
A01528	NP_000271	NP_990397	XP_002938577	NP_571379	XP_003977911
A01535	NP_001139301	NP_990748	NP_001011110	NP_001009901	XP_003963372
R01538	NP_066957	NP_001186314	NP_001107679	NP_001002052	XP_003967410
A01539	NP_002513	XP_420081	XP_002935046
A01540	NP_004219	NP_001026276	XP_002935045	XP_697830	XP_003977680
A01541	NP_000882	NP_990701	XP_002935044	XP_003200214	XP_003961109
A01542	NP_004533		NP_001017047	NP_001003516	XP_003977683
R01543	NP_057043	XP_426410	NP_001005010	NP_001002113	XP_003972129
R01544	NP_037474
R01545	NP_056444		NP_998859	NP_956798	XP_003977662
R01546	NP_055331		NP_001121452	NP_001005582	XP_003977685
R01547	NP_077292		NP_001016263	NP_001004591	XP_003977687
R01549	NP_001004		NP_001006813	NP_957146	XP_003977663
A01550	NP_003946	NP_989931	NP_988992	NP_956244	NP_001072096
A01551			XP_002934376
R01552	NP_075053	NP_001026590	NP_001015911	NP_001002322	XP_003965154
R01555	NP_778203	NP_001004381	XP_002932857	NP_851300	XP_003967684
R01561	NP_149044	NP_001034410	NP_001016552	NP_955878	XP_003975433
A01562	NP_919268	NP_001026444	NP_001039141	NP_998603	XP_003973844
A01563	NP_061956	XP_422313	NP_001182604	NP_001014331	XP_003977549
R01564	NP_001243315	XP_422312	NP_001123736	NP_001017760	XP_003977550
A01565			XP_002939022
A01567	NP_001241652	XP_416332	XP_002936884		XP_003972884
R01568	NP_001007795	NP_001006392	NP_001135694	NP_001103187	XP_003973062
A01569	NP_001171419	XP_416330	NP_001072226	NP_001035440	XP_003967343
A01571	NP_077288	XP_416329	NP_001090704	NP_001038233	XP_003972886
R01573	NP_057137	XP_416327	NP_001016824	NP_956467	XP_003972831
A01576	NP_036425	XP_419931	NP_001076815		XP_003962340
A01583	NP_006243	NP_001034694	NP_001135554	XP_700831	XP_003973909
R01586	NP_001165266	XP_001234377	NP_001165274	NP_001120728	XP_003977602
A01591	NP_620142	XP_421092	NP_001184083	XP_706374
A01592	NP_000527	XP_421091	XP_002937337	NP_571460	XP_003967418
A01593	NP_000439	NP_001026359	XP_002937338	NP_571464	XP_003967461
A01600			XP_002943358	NP_001017607
A01604	NP_001001936	XP_421770	XP_002938303	XP_695754	XP_003961633
A01605	NP_001012738	NP_001026387	NP_001016013	NP_001017877	XP_003964068
A01611	NP_000308	XP_417928	XP_002937697	NP_001092237	XP_003961424
A01619	NP_116062	XP_003643507	NP_001016417	NP_001007159	XP_003970709
R01621	NP_000066	NP_001007893	NP_001016742	NP_001071245	XP_003973148
R01623	NP_116175	XP_003643170	NP_001008145	NP_996981	XP_003973153
R01628	NP_001008212	NP_989567	XP_002935287	NP_001093536
A01629	NP_060988	XP_427082	NP_001016909	NP_001019984	XP_003973024
R01630	NP_660357		NP_001016485	NP_998099	XP_003967701
R01634	NP_001059	NP_990413	XP_002932456		XP_003969225
A01635	NP_000956	NP_990657	XP_002932450	NP_571481	XP_003973193
A01645		NP_001012563
A01647				XP_001919987
R01654	NP_056068	XP_425416	NP_001072375
A01663	NP_001171759
R01665		XP_420168	XP_002936839		XP_003962268
A01666		XP_420169	XP_002936827	XP_001922722
R01667	NP_002435	NP_990082	XP_002936828	NP_001004296	XP_003971150
R01668	NP_001164120	XP_001231274	NP_001120280	NP_001119872
A01669	NP_001010888	XP_003641177	XP_002931879	XP_001342172	XP_003971252
A01670	NP_061154	XP_420173	NP_001016675	NP_955936	XP_003970595
A01671	NP_110379	NP_001006405	XP_002933907	NP_571305	XP_003971925
A01674	NP_001164024	NP_001001745	NP_001106380
A01675	NP_002805	XP_420323	NP_001016356	NP_991317	XP_003970592
R01676	NP_443168	XP_003641164	NP_001016619	NP_001019605	XP_003973833
A01680	NP_006553	NP_001171614	NP_001072559	NP_001020703	XP_003972545
A01681	NP_005512	NP_990346	XP_002936814	NP_739571	XP_003963676
A01686	NP_620158	XP_422172
R01691	NP_001244109	NP_001026304	NP_001016904	NP_001071014	XP_003974988
A01692	NP_689786	XP_003643075	NP_001072877	XP_699335
R01695	NP_078881	XP_420436	XP_002933548	NP_001038715	XP_003972510
R01696	NP_004480		NP_001107718	NP_957267	XP_003966931
R01698	NP_057066
R01699	NP_001033	NP_990540	NP_001072458	XP_002662574	XP_003966961
A01700	NP_037437	NP_001001603	NP_001090749	NP_001191083	XP_003965326
R01702	NP_001229265	NP_001012802	XP_002941840	XP_686013	XP_003978092
R01703	NP_061161	XP_414580	NP_001186864	XP_001923116	XP_003970908
A01704	NP_689484	XP_414581	XP_002941534	XP_689262	XP_003970570
R01706	NP_071936	NP_001026642	NP_001121409	NP_001003493	XP_003975145
R01708	NP_000346	XP_427292	NP_001184035	NP_001116703	XP_003974939
R01709	NP_005437	XP_426924	XP_002938288	NP_919394	XP_003976410
R01710	NP_699179	XP_415314	XP_002938134	NP_001108050	XP_003975242
R01713	NP_001381	XP_419187	NP_001072360	NP_001074050	XP_003975332
R01715	NP_775283	NP_989581	XP_002936813	XP_002667515	XP_003967016
R01716	NP_036347	NP_001034394	NP_001120363	XP_002664185	XP_003964180
R01717	NP_008924	XP_001233764	NP_001016456	NP_001013502	XP_003964127
A01718	NP_006110	NP_001012785	NP_001008163	NP_571356	XP_003963679
A01719	NP_071322	XP_001233793	XP_002936816	NP_571596	XP_003963680
A01720	NP_056263	XP_421721	NP_001096275	NP_001038842	XP_003972544
R01722	NP_037377	XP_423372	XP_002943933	NP_001070077	XP_003967037
R01723	NP_001135864		NP_001072416	NP_999905	XP_003967039
A01726	NP_004221	XP_003643593	XP_002934399	NP_001153442	XP_003965253
R01731	NP_872363	XP_417923	XP_002932970	NP_001005575	XP_003968696
R01734	NP_001244120	NP_001006319	NP_001072584	XP_684923	XP_003968632
A01735	NP_009111		XP_002935060	XP_001336187	XP_003968697
A01736	NP_001138231	XP_417927	NP_001123804	XP_694648	XP_003977063
A01737	NP_055622	XP_425792		NP_001070851	XP_003971299
R01738	NP_006491	NP_001004768	XP_002941084	XP_003198751	XP_003970959
R01739	NP_110517	XP_001234108	NP_989335	NP_957160	XP_003963044
A01742	NP_055472	XP_001234099	NP_001096197	XP_698602	XP_003963042
R01743	NP_067038	NP_001026033	NP_001004796	NP_955850	XP_003963195
A01744	NP_004474	NP_001004372	NP_001011024	NP_001002579	XP_003970020
A01745				XP_002662959	XP_003970069
A01746	NP_001008723	XP_421748	NP_001119542	NP_001071024	XP_003970788
A01747	NP_203755	XP_426536	XP_002942965	NP_001017872	XP_003964036
R01748	NP_004823	XP_421747	NP_001005086	NP_001002621	XP_003964006
A01749	NP_079421	XP_421745	XP_002938114	XP_697139	XP_003964035
A01750	NP_001002759	XP_001234168	XP_002936844	NP_001076329	XP_003964034
A01752	NP_060814	XP_421594			XP_003964265
R01762	NP_001011516			NP_001009895
A01766	NP_694960	XP_425378	XP_002932493	XP_003199674
A01767	NP_005441	NP_989454	NP_001165369	XP_002664025	XP_003976139
R01768	NP_001078899	XP_429510	NP_001106539	XP_003198822
R01769	NP_001004431	XP_415598	NP_001017107	NP_001009983	XP_003964622
R01770	NP_005073	XP_415653	XP_002944871	NP_956469	XP_003976522
A01771					XP_003964349
R01772	NP_067639	NP_001012821	NP_001120087	NP_956486	XP_003964350
A01776				NP_840091	NP_001027848
R01777			XP_002940287
R01778	NP_002469	NP_989545	NP_988972	NP_571337	NP_001027941
A01779	NP_002023	NP_989714	NP_989008	NP_001119864	XP_003969725
A01780	NP_002460	NP_001025917	NP_001017160	NP_001003982	NP_001027943
A01781	XP_003960534	XP_421007	XP_002931676		XP_003967217
A01797	NP_006134	XP_003643346	NP_001016208	NP_957288	XP_003966988
R01798	NP_001301	XP_424137	NP_001090852	NP_001002702	XP_003976582
A01799	NP_085143	XP_428887	NP_001090711	NP_998405	XP_003976583
R01800	NP_477517	NP_001026528	NP_001106433	NP_001007053	XP_003967832
A01801	NP_060520
A01804	NP_001160164	XP_001231377
A01805			XP_002938084		XP_003977913
R01806	NP_001052	XP_416334	NP_001164997	NP_991172	XP_003967591
A01807	NP_073577	XP_416335	NP_001072750	NP_001093455	XP_003967228
A01808					XP_003967250
A01809		XP_416337
A01810	NP_065683	NP_001073571	NP_001107162	NP_001116219	XP_003964843
A01811	NP_003033	XP_414303	XP_002941943	XP_697438	XP_003972915
A01812			XP_002938146	XP_001336420	XP_003972688
A01813	NP_055154	XP_416389		XP_001921444
A01814	NP_001123308	XP_416388	XP_002938148	NP_571975	XP_003972928
R01819	NP_001258535	NP_989447	NP_001011128	NP_001189383
A01822			NP_001107504	XP_690132
A01823	NP_001014796	NP_001012818	NP_001072499	XP_693702	XP_003974744
R01824	NP_003070	NP_001006335	NP_001005436	NP_958455	XP_003972193
R01825	NP_001829	NP_001185681	XP_002942631	NP_001092213	XP_003972194
A01826	NP_004385	NP_001026174	NP_001017164	NP_571647	XP_003967949
R01827					XP_003972195
R01829	NP_006313	XP_416949	NP_001116269	NP_956416	XP_003977951
R01830	NP_064589	NP_990757	XP_002932200	NP_001017710	XP_003974389
A01836	NP_001257452	NP_989851	NP_001016177	NP_571326	XP_003962512
A01837		XP_421443
A01839	NP_067078	XP_001234988	NP_989171	NP_001002616	XP_003963858
R01841	NP_002221	NP_001254482	NP_989380	XP_002665522	XP_003964426
A01843	NP_001036111	XP_418813	NP_001163970	XP_001922729	XP_003979432
R01844	NP_000720	NP_990731	XP_002939084	XP_002665661	XP_003969006
R01846	NP_005866	XP_418815	NP_989015	NP_956597	XP_003976434
R01849	NP_000413	NP_001001311	NP_001006687	NP_001002383	XP_003979593
R01855	NP_444269	XP_417459	NP_989169	NP_001003577	XP_003962959
A01856	NP_787046	NP_001020003	XP_002942400	NP_001020621	XP_003962984
R01857	NP_036457	NP_001026031	NP_989115	NP_998805	XP_003962958
A01860	XP_003118847			XP_002663929
R01861	NP_003037	NP_001186031	XP_002940493	NP_001008584	XP_003970187
R01862	NP_004677	XP_420686	XP_002940495	NP_001035406	XP_003970186
R01863	NP_689628	XP_420687	NP_001015982	NP_956284	XP_003972548
R01864	NP_037486	NP_001006454	NP_001096375	NP_001070723	XP_003970132
R01867			XP_002940795
R01871	NP_001035370	XP_418929
R01874		NP_001074187
R01875	NP_001518	NP_989487	NP_001005432	NP_775343	XP_003962463
A01876	NP_001036236	XP_427615	XP_002939341	NP_001035418	XP_003962462
R01877	NP_444509	XP_001234111	XP_002939340	XP_001923404	XP_003962595
A01878	NP_056273	NP_001026272	NP_001072833	NP_001038535	XP_003971709
A01881	NP_061991	XP_417801	XP_002939338	NP_001230080	XP_003962769
A01882	NP_001182539		XP_002937966	NP_001032778	XP_003962768
R01883	NP_077272	XP_003642619	NP_001016093	NP_001139045	XP_003962626
R01884	NP_787048	XP_417796	NP_001135609	NP_001092700	XP_003969045
R01885	NP_036448	NP_001012859	NP_001008018	XP_001923921	XP_003969044
R01886	NP_060526	NP_001006313	NP_001005048	NP_956154	XP_003962625
A01892	NP_071449	XP_414904	NP_001120412	NP_001165868	XP_003972536
R01900	NP_001186108	XP_426010	XP_002937789	XP_003200287	XP_003965848
R01901	NP_054784	XP_003640788	NP_001121487	XP_001343186	XP_003968915
R01903	NP_473451	XP_418741	XP_002932836	NP_001038243	XP_003969316
R01906	NP_005485	NP_001012574	NP_989107	NP_956599	XP_003975561
R01919	NP_036575	NP_001186515	NP_001015976	NP_001002210	XP_003967918
A01926	NP_054703	XP_418674	NP_001165757	NP_001243320	XP_003969194
A01929	NP_064541	NP_001012575	XP_002938761	NP_956345	XP_003973259
R01930	NP_061878	XP_418678		NP_958490	XP_003965765
R01931	NP_002938	XP_418679	NP_001016626	NP_956521	XP_003969192
R01932		XP_001234533	XP_002938762	NP_001121845
R01934	NP_005628	NP_001072947	NP_001072937	NP_956038	XP_003977699
R01936	NP_057358	NP_001026527	XP_002938507	XP_691398	XP_003969215
A01939	NP_000152	NP_990554	NP_001006789	NP_001129727	XP_003969809
R01940	NP_115647	NP_001012546	NP_001135502	NP_001073654	XP_003964369
A01941	NP_065815	XP_414857	XP_002932514	XP_692129
R01947		XP_003643106	NP_001037915	XP_003199515	XP_003977530
R01949	NP_037393	NP_001006457	XP_002936759
R01955	NP_998734	NP_989819	NP_001008445	NP_001013589	XP_003977274
R01957	NP_006386	NP_001025763	NP_001123394		XP_003973483
A01960	NP_001192244	XP_001235257	NP_001120430	NP_001017734	XP_003966209
A01961	NP_660279	XP_003641955	XP_002937751	NP_999942	XP_003974344
R01962	NP_938015	NP_989486	NP_001120357	NP_001034725	XP_003974920
A01964	NP_000323	XP_003640803	XP_002932738	NP_001038291	XP_003968950
A01968	NP_001127853	XP_418745	XP_002932462	NP_956905	XP_003969313
R01981	NP_079286	NP_001026131	NP_001123404	NP_956124	XP_003976244
A01982	NP_001128350	XP_418511	XP_002941368	XP_001922460
A01983			XP_002941372
R01987	NP_001106965	NP_001025872	XP_002935968	NP_944593	XP_003964647
A01995	NP_036401	XP_001233420	NP_001090796	NP_001074140	XP_003967307
A01999					XP_003967258
A02000	NP_997046	NP_001186644	NP_001120284	XP_003198268	XP_003972947
R02001	NP_563616	XP_415996	XP_002941876	NP_001034979	XP_003967308
R02002	NP_004991	NP_001091106	NP_001039265	NP_001013474	XP_003972666
A02003	NP_001174	NP_001239540		XP_001339012	XP_003962982
A02004	NP_001156619	NP_990248	NP_989219	NP_571500	XP_003965761
R02005	NP_000445	NP_990395	NP_001016252	NP_571369	XP_003971372
R02006		NP_001012840		XP_695887	XP_003971396
R02010	NP_001243805	XP_424927	NP_001122112	XP_002662116	XP_003975226
R02019		NP_990703		NP_956971	XP_003967453
A02020	NP_001177989	NP_001238997	XP_002937547	XP_001922072	XP_003967743
R02021	NP_060290	XP_415556	XP_002942768	XP_003199355	XP_003976844
A02023	NP_001004354	XP_428951	NP_001096349	NP_852472	XP_003976843
R02024	NP_001624	XP_001234121	NP_989345	NP_957412	XP_003976841
A02025				NP_001092698	XP_003966764
A02026	NP_001040	NP_001106638	XP_002936957	XP_685832	XP_003966765
A02027	NP_068556	NP_990101	NP_989423	NP_571024	XP_003962608
A02029	NP_006833		XP_002935399	NP_001098747	XP_003978100
R02031	NP_004152	NP_001257591	NP_001004787	NP_957436	XP_003966747
A02032	NP_001524	XP_414998	NP_001093751	NP_957393	XP_003968770
R02036	NP_006275		NP_001017279	NP_001038276	XP_003963314
A02038	NP_001004052	XP_425056	XP_002937813	NP_571825	XP_003971127
A02039	NP_001005171	XP_425056	XP_002937813	NP_571825	XP_003971127
A02040	NP_036505	XP_425056	XP_002942785	NP_001121881	XP_003979971
A02041	NP_001004135	XP_425056	XP_002942785	NP_571825	XP_003971127
A02044	NP_001004135	XP_425056	XP_002942785	NP_571825	XP_003971127
A02045	NP_001004135	XP_425056	XP_002942778	NP_571825	XP_003971127
A02047			XP_002932266
A02048	NP_001005201	XP_425056	XP_002942785	NP_571825	XP_003971127
A02050	NP_001004490	XP_425056	XP_002942785	NP_571825	XP_003971127
A02051	NP_001005201	XP_425056	XP_002942785	NP_571821	XP_003979971
A02054	NP_001005201	XP_425056	XP_002942785	NP_571821	XP_003979971
A02057	NP_036505	XP_425056	XP_002937474	NP_571825	XP_003971127
A02059	NP_001004052	XP_426378	XP_002937474	NP_571667	XP_003979971
A02060	NP_001004135	XP_425056	XP_002937474	NP_571667	XP_003979971
A02061	NP_001004052	XP_003640668	XP_002937474	NP_571825	XP_003979971
A02062	NP_742013	XP_001234476	NP_001072873	XP_694642	XP_003967633
A02063	NP_542783
R02068	NP_004250	XP_001233565	NP_001135548	XP_694922	XP_003964525
R02069	NP_001156467	NP_001156475	XP_002940032
R02075	NP_001014308	NP_001006275	XP_002939630	XP_001921596	XP_003971383
A02077	NP_852480	XP_003640625	NP_001007919	NP_001002865	XP_003971367
R02078	NP_037470	XP_417093	NP_001006780	NP_001038819	XP_003971382
R02079	NP_001120689	NP_001019997	NP_001007479	NP_001004014	XP_003971365
R02080			XP_002939627	XP_001923680	XP_003971381
R02085	NP_001258028	NP_001026551	NP_001120082	NP_001099058	XP_003968156
A02087	NP_848659	XP_001236067	NP_001005659	XP_001920672	XP_003968155
R02088	NP_001026896	XP_414121	NP_001004911	XP_001343826	XP_003967477
R02092	NP_003787	XP_414123		NP_001025316	XP_003967585
A02093	NP_001122080	XP_003641396	XP_002933767
A02095		XP_418898	NP_001072478	NP_001073482	XP_003978222
R02102	NP_203747	XP_415832	XP_002939450	XP_001921323
R02106		NP_001152835	XP_002939151
R02110	NP_055501	XP_414143	XP_002935834
R02112	NP_056393	NP_001012796	NP_998832	NP_956719	XP_003976500
A02117	NP_001161288
A02118					XP_003971476
A02120	NP_002187		NP_001076827	NP_955952	XP_003962465
A02121	NP_065076	XP_419313	NP_001120298	XP_001920508	XP_003962604
A02124				XP_692132	XP_003966943
A02127	NP_000968	NP_990330	NP_989111	NP_937786	XP_003970070
A02128				XP_692132	XP_003966943
A02129				XP_692132	XP_003966943
R02130	NP_001135	XP_414064	NP_001017083	NP_998328	XP_003969572
R02131	NP_008937	XP_003641943	NP_001017262	NP_957411	XP_003970032
R02132	NP_003780	XP_414067	XP_002937214	NP_571682	XP_003970098
R02133	NP_060848	XP_001232783	NP_001121528	NP_001032499
R02134	NP_665877	XP_421288	XP_002938913	NP_001038525	XP_003969015
A02135	NP_001035757	NP_001165845	XP_002942927	NP_001013335	XP_003969203
R02136	NP_110417	NP_001005840		XP_002662910	XP_003969476
A02137	NP_001093120	NP_001025907			XP_003967683
A02138	NP_005739	NP_001007851	NP_988897	NP_001038733	XP_003972870
R02139	NP_149105	XP_416034	NP_001107973		XP_003972869
R02140	NP_001137260	NP_001025908	NP_988979
A02143	NP_001073347	NP_990552	XP_002931690	NP_001038211	XP_003973936
R02146	NP_570854	XP_416882	NP_001001213	NP_001007319	XP_003977642
A02147	NP_001243181		XP_002935467		XP_003964790
A02148	NP_001965		XP_002935464		XP_003964790
A02150	NP_001965		XP_002935464		XP_003964790
R02152	NP_078932	XP_422290	XP_002933810	XP_694217	XP_003964794
R02154	NP_036220	NP_001026759	NP_001184018		XP_003964763
A02156	NP_115560	XP_427446		XP_696571
R02157	NP_775754	XP_001235180	NP_001015810	NP_001083010	XP_003966661
R02158	NP_001159585	NP_001106924	NP_001090744	XP_001921208	XP_003972016
R02159	NP_065394	XP_423829	NP_001011347	XP_001336199	XP_003972146
R02160	NP_001035926	NP_001258088	NP_001039139	NP_001002482	XP_003972125
A02161	NP_443122	NP_001038151	NP_001106487	NP_001038687	XP_003972145
A02163				NP_001116329	XP_003976523
A02164	NP_115960				XP_003964790
A02170	NP_067064
A02171	NP_001010883			NP_001038309
R02172	NP_036558	XP_001232348	XP_002931705	XP_002667683	XP_003976685
R02174	NP_796375		NP_001015832	NP_996935	XP_003974120
R02175	NP_001001975	XP_001234760	NP_001016516	NP_956262	XP_003974059
R02177	NP_001138434		XP_002941348		XP_003965568
R02180	NP_006466	NP_001025712	NP_001106376	NP_001071254	XP_003968681
A02189	NP_113643	XP_003640381	NP_001017103	NP_001020681	XP_003973678
R02192	NP_005259	XP_425784	NP_001106371	NP_001124108	XP_003962600
R02194	NP_001005752	XP_425784	NP_001106371	NP_001017685	XP_003962601
A02195	NP_002051	NP_996867	NP_001072904	NP_571113	XP_003977492
A02196	NP_001026	XP_419553	XP_002939294	XP_001923294	XP_003971208
R02197					XP_003972718
A02198	NP_997634	XP_421045	NP_001011466	NP_001093482	XP_003967179
R02200	NP_001867	NP_001012916	NP_001107300	XP_002666893	XP_003967147
A02201	NP_000400	XP_428001	NP_001072507	NP_571945	NP_001027790
R02202	NP_006074	NP_001006145	XP_002940179	NP_955883	XP_003970922
A02203	NP_003350	NP_001012599	NP_001013628	NP_001103872	XP_003972206
A02205	NP_001244969	NP_001006144	XP_002944317		XP_003977109
R02206	NP_002100	NP_001006144	XP_002944317	NP_001004586	XP_003977109
R02207	NP_653324	NP_001026636	NP_001005119	NP_997846	XP_003970901
R02210	NP_060890	XP_421535	NP_001039179	NP_001103169	XP_003963824
R02212	NP_001001330	NP_001186461	XP_002940797	NP_001032664	XP_003977989
A02214	NP_877499	XP_416124	XP_002931668	NP_001232000	XP_003967814
R02216	NP_004090	XP_415401	NP_989344	NP_571833	XP_003978429
R02218	NP_001121134	NP_990265	NP_001016856	NP_001012312	XP_003978430
R02219	NP_057406	NP_001012814	NP_001007505	NP_956977	XP_003965555
A02220	NP_008949		XP_002941352	XP_002667195
A02223	NP_001726	XP_415405	NP_001190988	XP_001919226	XP_003974669
A02224	NP_001177874
A02225	NP_066961	XP_415406		NP_001121853	XP_003978146
A02226	NP_056466	XP_003642354	NP_001072446	NP_001121998	XP_003978328
A02227	NP_001014837	XP_415407	NP_001165769	NP_956648	XP_003978710
A02228	NP_005038	NP_001012815	NP_001015983	NP_001017573	XP_003965288
A02230	NP_114436	XP_415409	XP_002935272	XP_001343419	XP_003965331
R02231				NP_998166
A02235		XP_422364	XP_002931747	XP_002666615
R02236	NP_001545	NP_001026734	NP_001098984	NP_001001826	XP_003974416
R02237	NP_036269	NP_989713	NP_001120524	NP_998441	XP_003974417
R02238	NP_003912	NP_001188416	NP_001015777	XP_002660738	XP_003975407
A02239	NP_932343	XP_422366	NP_001015959
A02240	NP_115560	XP_422367			XP_003974443
A02241	NP_001128578	XP_419477			XP_003976455
A02242			XP_002933404
R02248	NP_001197	XP_003643067	NP_001107146	NP_001070240	XP_003975277
R02253			XP_002935266
A02254	NP_434700	XP_425329	NP_001120274	NP_001103755
A02255	NP_003077	XP_415416	XP_002935279
A02256	NP_001034797	XP_001235313	NP_001037937	NP_001103754
A02257	NP_055975	NP_001006197	XP_002935264	NP_001007443	XP_003975159
A02258	NP_063945	XP_415418	XP_002935265	NP_001096089	XP_003975255
A02260	NP_055681	XP_415419	XP_002935278		XP_003965328
A02262	NP_003115	XP_423038	NP_001120067	NP_001122262	XP_003965138
A02263	NP_060087	XP_415420	NP_001090757	NP_571516	XP_003975158
R02265	NP_000963	NP_001004379	NP_001072159	NP_956341	XP_003965297
R02266	NP_003163	NP_001012671	NP_001016789	NP_001073642	XP_003965342
R02269	NP_001257293	XP_003640473	NP_001011027	NP_001185701	XP_003976614
R02270	NP_054798	XP_425161	XP_002938279	NP_997911	XP_003977845
A02272	NP_872434	XP_425162	XP_002938271	XP_003198830
A02274	NP_001011666
R02276	NP_061902	NP_001026662	NP_001016807	NP_954972	XP_003966157
A02279				NP_001070935
A02283	NP_001092	NP_001007825	NP_998884	NP_571106	XP_003964470
A02286	NP_057419	XP_001234062	XP_002932121	XP_003198647	XP_003965593
R02288	NP_004852	XP_415296	XP_002934319	NP_001119924	XP_003975041
R02289	NP_055118	XP_001234133	NP_989410	NP_571105	XP_003974965
R02290	NP_061133	XP_003642934	NP_001006885	NP_001004607	XP_003974957
A02291	NP_006222	XP_001233985	XP_002934338	NP_001121995	XP_003975040
A02292	NP_057402	NP_990079	XP_002938288	NP_945334	XP_003974964
R02296	NP_075383	NP_001026130	XP_002939408	NP_001070096	XP_003975426
R02297		XP_001232812			XP_003975427
A02298	NP_660202	NP_996864		NP_957184
A02300	NP_001123528		NP_001011450	NP_001170924	XP_003975499
A02303	NP_009163	XP_425705	XP_002931741	NP_001020689	XP_003973991
R02304	NP_056481	XP_417403	NP_001011236	XP_001336634	XP_003977250
R02305	NP_002783	NP_989944	NP_989071	NP_998331	XP_003977696
R02306	NP_653304	XP_001234622	NP_001025676	NP_956465	XP_003973564
R02313	NP_000091	NP_001185577	NP_001123784	NP_001096599	XP_003968048
R02321	NP_056091	XP_414805	NP_001192175	NP_001038713	XP_003964698
R02325	NP_056325	XP_414804	NP_001072246	NP_001017758	XP_003964500
A02326	NP_003867	NP_001026637	NP_001016689	NP_001017400	XP_003964535
R02327	NP_690878	NP_001025804	NP_001008090	NP_001013336	XP_003964558
A02328			XP_002934849
A02334	NP_001139478	XP_426175	XP_002937891
A02335	NP_612468	XP_419766	NP_001016090	NP_001002356	XP_003977495
R02339	NP_060661	XP_417063	NP_001017352	NP_956285	XP_003961798
A02340	NP_612459	NP_001006352	XP_002935781	NP_955987	XP_003966796
A02341			XP_002935782
R02342	NP_002258	NP_001180504	NP_001016060	NP_958477	XP_003961799
R02343	NP_065189	NP_001006273	NP_001016934	NP_999941	XP_003961800
R02344	NP_001007279	XP_417067	XP_002935797	NP_001018439	XP_003961852
A02345	NP_775876	XP_417068	NP_988863
A02347	NP_005551	XP_003642506		NP_001034260	XP_003977609
A02349				XP_001921941
A02350		NP_001074339
A02352	NP_003811		NP_001138688	NP_001038837
A02353	NP_689584	XP_003643058	NP_001017220	NP_998478	XP_003973388
A02354	NP_258428	XP_001233077	NP_001120567	XP_689191	XP_003973387
A02357	NP_115635	NP_001025799	NP_001135538	NP_998228	XP_003961352
A02358		XP_414478	XP_002940238	NP_001002723	XP_003972767
A02359	NP_690850	NP_001073182	NP_001072718
R02361	NP_001018088	XP_003642325
R02363		NP_001132911	XP_002934910	XP_002665520	XP_003969177
A02364		XP_425943	XP_002932276
R02366	NP_064522		NP_001164995	NP_001116792	XP_003963100
R02370	NP_055050		NP_001096510	NP_956594	XP_003979659
A02371	NP_054798	XP_425161	XP_002938279	NP_997911	XP_003977845
R02372	NP_001025067	NP_001007845	NP_001011326	NP_956525	XP_003965408
R02374	NP_004628	XP_003642026	NP_001008026	NP_001005591	XP_003973221
R02375			XP_002937978	XP_003199438	XP_003965494
A02379	NP_001092	NP_001007825	NP_989332	NP_571106	XP_003972351
R02383	NP_002052	NP_001007954	NP_001016536	NP_956139	XP_003974194
R02384	NP_612510	XP_422331	NP_001072625	NP_958456	XP_003972070
A02385	NP_000341	XP_422330	NP_001011033	XP_683123	XP_003975387
R02390	NP_065905	XP_418993	NP_001120526	NP_957138	XP_003967941
R02391	NP_005264	NP_001012853	NP_001016952	NP_001013515	XP_003971180
R02392				XP_001921348
A02393	NP_005699	XP_416989	XP_002939330	NP_001103189	XP_003970681
A02395	NP_003876	XP_003641695	XP_002935561	NP_001002515	XP_003961081
A02396	NP_001257411	XP_428428	XP_002935612	NP_001159710	XP_003961082
R02397	NP_001019397	NP_001006352	NP_001001905	NP_958888	XP_003961118
R02399	NP_065733	XP_421735	NP_001135714	NP_001034928
A02401	NP_542408	XP_415908	NP_001165079	NP_001025171	XP_003968584
R02402	NP_008855	NP_001107213	NP_001006919	NP_956887	XP_003968583
R02405	NP_060419	XP_003642482	NP_001016217	NP_001082842	NP_001027917
A02406	NP_976328	XP_416110	XP_002935684
R02407	NP_001229778	XP_423089	NP_001008060	NP_956148	XP_003966019
R02408	NP_001132982	XP_001231583	NP_001037862		XP_003966020
R02409	NP_001284	XP_423253	NP_001032339	NP_571499	XP_003968286
R02416	NP_001035931	NP_990142	NP_001017285	NP_571958	XP_003964155
A02421	NP_073583		XP_002941125	NP_001014389
R02426	NP_001135934	NP_001163815	XP_002934454	NP_001006079	XP_003965888
A02427		NP_001026508
A02430	NP_056982	NP_990011		XP_694029	XP_003974105
A02431					XP_003974104
R02432	NP_056981	XP_003642892	NP_001011455	NP_998568	XP_003974046
A02438	NP_001153003	XP_426464	NP_001106497	NP_001038475
R02441	NP_004175	XP_421368	NP_001039220	NP_957066	XP_003962765
A02442	NP_997000	XP_421367	XP_002936635	NP_001038779	XP_003971651
R02443	NP_001034444	XP_421366	NP_001096191	NP_001025408	XP_003962766
R02444	NP_003394	NP_001026381	NP_001116880	NP_997782	XP_003971577
R02445	NP_004233	NP_001006412
A02446	NP_060179	NP_001007973	XP_002943490	NP_956801	XP_003962292
R02448	NP_060347	XP_428633	NP_001107501	NP_001002559	XP_003971853
A02451	NP_059135	XP_415969
A02456			XP_002932464
A02457	NP_001093110	XP_001232349
A02458	NP_001080	XP_414701	XP_002932496		XP_003964719
R02466	NP_001474	NP_001025884	NP_001039092	NP_571109	XP_003971039
R02467	NP_057053	NP_001185576	NP_001017055	NP_001018395	XP_003971040
R02468	NP_000259	XP_415783	NP_001072362	NP_998116	XP_003971048
R02469	NP_057122	NP_001006211	NP_001004953	NP_957415	XP_003968661
R02470	NP_060734		NP_001096267	NP_001070624	XP_003968737
R02473	NP_057152		NP_001123678		XP_003966995
R02477	NP_062456	XP_003641153	NP_001015761	NP_998534	XP_003970136
R02478	NP_037495	XP_426680	NP_001008157	NP_001025352	XP_003968073
A02481	NP_065877			NP_001017652
A02482	NP_001243624	XP_421099		XP_693848	XP_003967387
R02485				NP_001038862
A02487	NP_037509
A02488	NP_976310	XP_001234946		XP_001342604	XP_003977608
R02489	NP_005048	NP_001026085	NP_001025680	NP_956539	XP_003973044
A02491	NP_056190	NP_989837	NP_001007477	NP_991190	NP_001027827
R02493		XP_417966	XP_002933048	XP_684045
A02494	NP_149093	XP_001234996	XP_002933049	NP_991235	XP_003967045
R02496	NP_776253	XP_417968	XP_002938280	XP_002663867	XP_003973816
R02497	NP_689704	NP_001026086	NP_001120523	NP_001070769	XP_003963552
A02498		XP_001234313	NP_001015910	NP_001013509	XP_003977423
R02499	NP_997647	NP_001185641	NP_001025695	NP_571595	XP_003962106
R02501	NP_060470	XP_421870	NP_001016432	NP_001002167
R02502		XP_001232694	XP_002932041	NP_001038247	XP_003962151
R02503	NP_542409	NP_001006512	NP_001011221	NP_998479	XP_003962133
R02506	NP_055055
R02509	NP_008869	XP_001235936	NP_001004780	NP_775359	XP_003968964
R02511	NP_789794	XP_003641242	XP_002941937	NP_001070613	XP_003970722
A02514	NP_060417	XP_419048		NP_001014388	XP_003963760
R02515	NP_000525	NP_001006508	NP_001136373		XP_003962250
R02516	NP_001121622	XP_001231893	NP_001096387	NP_956387	XP_003962196
A02517	NP_612431			NP_001119919	XP_003962249
R02518	NP_071748	XP_421842	NP_001153459	NP_001005301	XP_003962247
A02521	NP_113664	XP_414180	NP_001027499	XP_003199065	XP_003970025
R02522	NP_005144	NP_001006130	NP_001006761	XP_685621	XP_003970076
R02523	NP_079007	XP_414178	XP_002934993	NP_001018416	XP_003967062
R02524	NP_066972	NP_001159797	NP_001016541	NP_956306
A02527	NP_055676	XP_003641977	NP_001072524	XP_003200287	XP_003965848
R02528	NP_067020	NP_989885	XP_002934998	NP_001093470	XP_003967234
A02529	NP_150375	XP_418075	XP_002933306	NP_998002	XP_003965003
R02531	NP_003945	NP_001026098	XP_002935595	XP_002661254
A02533	NP_001244321	XP_421038	NP_001116919	NP_955837	XP_003963516
R02542	NP_065747	NP_001006369	NP_001016005	NP_997863	XP_003965895
R02547	NP_071427	NP_996868	NP_001090798	NP_001107885	XP_003970659
A02550			NP_001135515
R02552	NP_852106	XP_003640693	XP_002939355	NP_001104649	XP_003973839
A02554	NP_001128653	XP_422460	XP_002931459	NP_001107077	XP_003973859
R02555	NP_057067	NP_001026324	XP_002932595	NP_001082922	XP_003974525
A02556	NP_001853		NP_001016250	NP_001002163	XP_003965420
R02558	NP_002510	XP_417161	XP_002934973
R02559	NP_000010	XP_417162	NP_001025572	NP_001003746	XP_003976132
R02560	NP_003469	XP_417163	NP_001072836	XP_001922879	XP_003970982
A02565	XP_003961004	NP_001038144	NP_001120081	NP_001007168
A02566	NP_005261	XP_003641632	XP_002943329	NP_571042	XP_003962185
A02571	NP_005904	NP_001026186	NP_001096392	NP_775386	NP_001027937
R02573	NP_067066	XP_001233537	NP_001165089	NP_998807	XP_003971945
R02575	NP_006828	NP_001034400	NP_989109	NP_957019	XP_003967989
A02577	NP_001180431	XP_427081
A02578		XP_418281	NP_001016643	NP_001002202	XP_003968023
A02580	NP_001129632	XP_425920		XP_001923762	XP_003968022
A02581	NP_001028750	NP_001026111	XP_002935367	NP_001103937	XP_003967988
R02583	NP_004640	NP_001025969	XP_002936364	NP_001017662	XP_003961702
R02584			XP_002936285
A02585	NP_061865	XP_414889	NP_001017294	NP_996932	XP_003961355
R02586	NP_003336	NP_989596	NP_001016408	NP_571426	XP_003961356
R02590	NP_001139019	XP_416473	NP_001006732	NP_957209	XP_003973002
R02594	NP_003335	NP_001025818	NP_001004909	NP_958897	XP_003972853
A02596	NP_006232		NP_001163967	NP_991231	XP_003974283
A02597	NP_001004754	XP_003643330	XP_002942454	NP_001122261	XP_003966975
A02602			XP_002933338	NP_957110	XP_003966160
A02605	NP_060710	XP_423078	XP_002938994	NP_998033	XP_003966853
A02611	NP_055173
A02612	NP_002857	XP_003642996	NP_001016426	NP_001017761	XP_003974387
R02614	NP_116072	XP_003642934	NP_001004930	NP_001002567	XP_003974402
A02615	NP_001098101	XP_003643033	XP_002938226	XP_695374	XP_003975794
R02619	NP_002219	NP_001026460	XP_002937979	NP_001121814	XP_003975767
R02621	NP_036453	XP_418245	NP_989371	NP_956990	XP_003974401
A02622	NP_060182	XP_418244	NP_001006752	NP_001018362	XP_003974386
A02624	NP_001078906	XP_001233703
A02625	NP_062824		XP_002933399	XP_697546	XP_003977043
R02626	NP_000021	XP_003641783	NP_001006705	NP_998327	XP_003975632
A02627	NP_001240652	XP_418377	XP_002933381	NP_001008599	XP_003973864
R02631	NP_001123484	XP_414851	NP_001135534	XP_003198121	XP_003964655
A02632	NP_002519	NP_001073043	NP_001037884		XP_003972103
A02634	NP_663771
R02637	NP_036335	XP_418900	XP_002936497	NP_001038714	XP_003968970
A02638	NP_001167453		NP_001096546	NP_997989	XP_003972660
A02641	NP_115524	NP_001026654	NP_001096676
A02642	NP_689531	XP_003640442	XP_002938117	NP_001188341	XP_003972681
R02651	NP_006248	XP_001235980	XP_002934267	NP_001082839	XP_003972786
A02655	NP_060021	XP_426488	NP_001096470	XP_685683	XP_003961134
R02662	NP_005252	XP_417447	NP_001016726	NP_957468	XP_003969720
A02664				NP_001025449
A02665				NP_956253
R02666	NP_067675	NP_989732	NP_989080	NP_998034	XP_003971570
R02667	NP_653229	XP_001235015	NP_001016881	NP_001020343	XP_003973493
A02672	NP_612502	XP_419485	NP_001096519	NP_001020655	XP_003971830
R02673	NP_055865	XP_419486	NP_001123814	NP_956427	XP_003971781
R02674	NP_003949	XP_419487		NP_991329	XP_003971848
A02675	NP_002399		NP_001006759	XP_003200820	XP_003971427
A02677	NP_689539	XP_419365	XP_002942690	NP_001017689	XP_003977367
A02678	NP_689539	XP_419365	XP_002942690	NP_001017689	XP_003977367
R02679	NP_076421	XP_426133		XP_001921712	XP_003963976
A02680	NP_001139490	XP_419505		XP_001921685	XP_003963977
A02681	NP_001012992	XP_419504	NP_001120355	XP_699375	XP_003963975
R02682	NP_056203	NP_001012584	NP_001120466	NP_956201	XP_003963978
R02683	NP_976035	XP_419502	XP_002942192	NP_956860	XP_003978340
R02684	NP_065801	XP_419501	NP_989112	XP_001921422	XP_003964102
A02685		NP_001001304	XP_002942198
R02686	NP_001138594	XP_419369	NP_001008025	NP_956739	XP_003979277
A02687	NP_003598	NP_001186372	XP_002938889	NP_001038559	XP_003971534
R02689	NP_999627	XP_419602		NP_001071262	XP_003963752
R02690	NP_056041	XP_414931	XP_002939229	XP_003198156	XP_003964567
R02696	NP_001545	NP_001026734	NP_001098984	NP_001001826	XP_003974416
A02698	NP_115646	XP_003642331	NP_001120353	XP_686175	XP_003965291
A02699	NP_115646	XP_422353	NP_001007863	XP_001919381	XP_003973870
R02701	NP_660186	XP_415583	NP_001027523	NP_001177235	XP_003972126
R02702	NP_055554	XP_003640970	NP_001032327	XP_699026	XP_003965717
R02703	NP_114098	NP_001025976	XP_002938790		XP_003965718
R02704	NP_057712	XP_425975	NP_001011171	NP_955954	XP_003977137
R02706	NP_068747	NP_990628	NP_001017094	NP_998113	XP_003977378
R02707	NP_543150	XP_001232358	XP_002942608	NP_001017753	XP_003970693
R02708	NP_653245	NP_001026309		NP_001004013
A02709	NP_055909	XP_001232817	XP_002931932	NP_878289	XP_003975100
R02710	NP_003338	NP_001006180	NP_001016063	NP_001002072	XP_003976109
R02711	NP_001017964	XP_001234391	NP_001004876	NP_001076331	XP_003976113
A02714	NP_002181	NP_989791
R02716	NP_003926	NP_001006181	NP_001182501	XP_003198651	XP_003977460
R02717	NP_055449	XP_415067	XP_002934392	NP_001018165	XP_003976351
R02718	NP_002736	NP_989481	NP_001017127	NP_878308	XP_003975118
R02719	NP_037445	XP_415068	NP_001016705	NP_001003780	XP_003975117
R02720	NP_055152	NP_001025824	NP_001039036	NP_957285	XP_003975116
A02721	NP_003316	NP_989563	XP_002931950	XP_696478	NP_001027852
R02722	NP_003767	XP_003642247	NP_001016249	NP_001004612	XP_003975056
R02723	NP_005650	NP_989632	NP_001006806	NP_001002451	XP_003974978
A02724	NP_003495	XP_415070	XP_002931928	NP_998551	XP_003974984
R02725	NP_001008491	NP_001006182	NP_001017039	XP_001346020	XP_003974982
A02727		XP_003642220	XP_002931927	NP_001138284	XP_003974981
R02730	NP_542378		NP_001030290	NP_899182	XP_003974604
R02731	NP_443730	NP_001012811	NP_001120042	NP_001013526	XP_003974756
A02733	NP_009294	XP_001233014	NP_001016357	NP_001025328	XP_003973723
R02734	NP_001661	NP_989796	XP_002931926	NP_001122006	XP_003974602
R02736	NP_690870	NP_001007837	NP_001004885	NP_001003781	XP_003974601
R02738	NP_073564	XP_415080	NP_001120451	NP_956223	XP_003974754
R02739	NP_002873	NP_001006183	NP_989020	NP_997931	XP_003974753
R02740	NP_037505	NP_001033780	NP_001037871	NP_840089	NP_001072064
A02741	NP_001164014	XP_415083	NP_001004858	NP_001007324	XP_003974598
R02745				XP_001920115	XP_003966212
A02748	NP_036477	NP_001025996	NP_001039189		XP_003966574
R02749	NP_061029	NP_001006270	NP_001072786	NP_001003473	XP_003969932
R02750	NP_004119	XP_003640649	NP_988987	NP_001096603	XP_003969931
A02753	NP_940686	NP_001186255	NP_001121426	NP_001002224	XP_003962089
R02755	NP_003286	NP_990729	NP_001008074	NP_937783	XP_003962088
A02756	NP_001010875	XP_417040	NP_001165746	NP_956458	XP_003975903
A02757	NP_113619	XP_417041	XP_002941013	NP_001137512	XP_003961924
A02758		XP_001235433	XP_002931953	NP_001038873	XP_003978531
R02759	NP_061870	XP_424290	NP_001016340	NP_001153310	XP_003969344
R02761	NP_004689	NP_001026561		XP_003200185	XP_003976207
R02762	NP_036245	XP_003642713	NP_001103521
R02763	NP_001071096	XP_428797	NP_001015843	NP_956409	XP_003969662
R02764	NP_002861	XP_413757	NP_001025679	NP_958486	XP_003966301
A02765	NP_001021	XP_413758	NP_001165122	NP_001153000
R02769	NP_612140	NP_990831	XP_002937498
R02770	NP_001036041	NP_001244275	NP_001005671	NP_001139027	XP_003964274
R02773	NP_055241	NP_001073225	NP_001016081	NP_999934	XP_003964157
A02774	NP_443097	XP_415017	NP_001120532	NP_001008640	XP_003964275
A02775	NP_067043	XP_415018	NP_001004998	XP_003200887	XP_003966919
R02776	NP_001158283			NP_001158284
A02777	NP_005876	XP_419012	XP_002938364	XP_002660875	XP_003967913
R02778	NP_006422	NP_001012551	NP_001006757	NP_958863	XP_003976727
A02779	NP_963844	XP_425439	XP_002938552	NP_001009559	XP_003967428
A02780	NP_001901	XP_416090	XP_002938556	NP_571879	NP_001072055
R02781		NP_001186598	NP_001155224
R02783	NP_071901	XP_416092	NP_989130	NP_001018417	XP_003972727
A02786	NP_852118	XP_425585			XP_003962083
R02788	NP_002344	XP_001235525	NP_001011149	NP_001017593	XP_003963665
A02798	NP_694591	XP_421393	NP_001238746	NP_001123984	XP_003962715
A02800	NP_001244197	XP_001234710		NP_001074100	XP_003971900
A02802	NP_001135977	XP_425801	XP_002942182	XP_687685	XP_003971190
R02803	NP_079103	XP_414321		XP_001920667	XP_003968677
R02804	NP_002906	NP_001006276	XP_002934079	NP_958865	XP_003976950
A02810	NP_001035374	XP_414098	XP_002937419	XP_697115
A02811	NP_891552	NP_001025740	NP_001011439	NP_957183	XP_003969595
A02814	NP_055884	XP_414103	XP_002937417	NP_001073499	XP_003980012
A02817	NP_000315	NP_001004370	NP_001039257	NP_001119916	NP_001027816
R02820	NP_660143	NP_001073184	NP_001016288	NP_001107789	XP_003969869
A02822	NP_001026885	XP_413925	XP_002933003	NP_001038594
R02823	NP_078942	NP_001258457	NP_001238766	NP_001002423	XP_003967627
R02826	NP_055772	XP_418419	XP_002934521	XP_001338419	XP_003968981
A02832	NP_001010923	XP_001232459	XP_002940439	XP_683025	XP_003977160
R02833	NP_001020471	XP_003640848	XP_002937521	NP_001018466	XP_003975399
A02835	NP_056025	XP_423729	XP_002942331	XP_001338362
A02840	NP_001297	NP_989533	NP_001005709	XP_001332015	XP_003971036
A02841	NP_055225	XP_001231315	NP_001004936	NP_001093464	XP_003975520
R02842	NP_569057	NP_001034688	XP_002934169	NP_001116312	XP_003968105
A02851		XP_421857
A02856	NP_001077422	NP_001103529	XP_002932440	XP_003199748	XP_003963695
R02858	NP_001231630		NP_001096423	NP_001070621	XP_003963664
A02859	NP_003387	XP_001234394	NP_001096553	NP_001131132	XP_003964917
R02864	NP_055847	NP_001012845	NP_001107500	XP_693953	XP_003972219
A02866	NP_705691	NP_001038112	XP_002942655	XP_697640	XP_003977477
A02868			NP_001017147
R02890	NP_689600	XP_421925	XP_002941243
R02891	NP_001093892	XP_003643320	NP_989244	NP_001071194
R02893	NP_001034782	XP_421921	XP_002937758	NP_001071011	XP_003962231
R02894	NP_710156		NP_001016527	NP_001071196	XP_003962235
R02896			NP_001106633	NP_001070113	XP_003962236
A02898	NP_001165980	NP_001186039	XP_002937759	NP_001122004	XP_003961743
A02900	NP_001035862	XP_416154	NP_001072389	NP_956551	XP_003972750
A02901	NP_006829	NP_001006233	NP_001016115	NP_955934	XP_003972751
A02904	NP_060069	XP_416152	NP_001039208	NP_001108047	XP_003972806
A02905	NP_060821	XP_416149	XP_002935374
A02906			XP_002938964
A02907	NP_001135975	XP_001232150	XP_002938963	NP_001119949	XP_003968678
R02909	NP_776195	XP_420160	NP_001015932	NP_001002096	XP_003978675
A02910	NP_002538	XP_420161	NP_001072480	XP_698022	XP_003971253
A02912				NP_001076592
A02913	NP_001229239	NP_001076829
A02915	NP_057624		XP_002941889		XP_003977621
A02917	NP_057624	XP_426254	NP_001072505	XP_001342488	XP_003977621
A02918	NP_001124332	XP_420165	XP_002939767	NP_571877	XP_003978693
A02919	NP_004497	XP_420166	NP_001039053	NP_571942	XP_003969203
R02920	NP_001191236	NP_990213	NP_001015745	NP_001002568
A02922	NP_056277	XP_003642386		NP_001025234	XP_003978257
R02923				XP_692075
R02925	NP_001010887	XP_424820	NP_001017116	XP_002663077
R02926	NP_060544	XP_423475	NP_001017176	NP_001104303	XP_003962830
R02928	NP_057623	NP_001034409	NP_989353	NP_001002071	XP_003975688
A02932	NP_115996	XP_425893	NP_001072707	NP_001018509	XP_003974110
R02933	NP_109587	NP_990719	NP_001008058	NP_001032468	XP_003974047
A02936	NP_001020105	XP_419791	NP_001096217		XP_003971800
A02942	NP_001129688		NP_001039187	NP_001096087	XP_003973443
A02948	NP_005981	XP_414529	XP_002936852		XP_003964032
A02953				XP_003198755
R02957	NP_653199		NP_001005442	XP_683234	XP_003969494
R02958			XP_002939998
R02959	NP_056101	NP_990140
A02964		XP_003640839
R02967	NP_001096137	NP_001185531	NP_001007998	NP_999862	XP_003969677
R02975	NP_060137	NP_001012872	NP_001107716	XP_001923725	XP_003969358
A02977	NP_006071	NP_990308	XP_002935301	NP_571125
A02978				XP_001336763
A02981	XP_001717260
A02982	NP_001191055	XP_416434
A02983	NP_001076442	XP_416435		NP_001092924	XP_003973010
R02984	NP_001001660	XP_001235312	XP_002944626	NP_001153295	XP_003972991
R02986	NP_004976	NP_001243091	XP_002943663	NP_001003744	XP_003967328
A02987	NP_002381	XP_425842	NP_001243157	XP_695529	XP_003964938
R02989	NP_653210	NP_001007885	NP_001016065	NP_956952	XP_003964839
A02990		XP_001234414
R02991	NP_001005781	NP_989466	NP_001005111	NP_998324	XP_003966620
A02997			NP_001039120
R02998	NP_006315	NP_001001189	NP_001017329	NP_001093505
R02999	NP_660297	NP_001074349	NP_001107395	NP_956983	XP_003976746
A03000		XP_428329		NP_001122055	XP_003966975
A03001	NP_067076	XP_001234476	XP_002944013	XP_694642	XP_003967633
A03002	NP_742013		NP_001072873	XP_694642	XP_003967633
R03005	NP_899229	XP_418967	NP_001123734	XP_694713	XP_003968160
A03008	NP_068764	XP_418968	XP_002936473		XP_003979178
R03009	NP_001122063	XP_418969	XP_002936462	XP_002667418	XP_003979179
A03011	NP_821080	NP_001004400	NP_989275	NP_942104	XP_003977694
A03012	NP_821080	NP_001004400	NP_989275	NP_942104	XP_003977694
R03013	NP_004323	XP_418972	XP_002936463		XP_003979180
R03015	NP_003795	NP_989733	NP_001072503	NP_001036815	XP_003975345
R03023	NP_001138579	NP_001025911	NP_001090754	XP_002661425	XP_003967539
R03024	NP_000055	NP_990736	XP_002940099	NP_571317	XP_003972135
A03025	NP_056540	XP_426642	XP_002940417	XP_684476	XP_003978440
A03026				XP_684244
R03031	NP_079230	XP_429110	NP_001123765	NP_001025436	XP_003961581
R03034	NP_932160	XP_003641569	NP_001120250	NP_957336	XP_003964182
R03035	NP_057130		NP_001123851		XP_003972075
R03036	NP_002620	NP_001026727	NP_001119984	NP_942099	XP_003972074
R03038	NP_055994	NP_001012926	NP_001075884	NP_001025447	XP_003964184
A03039		NP_001232911	XP_002939707
A03041		NP_990578
R03042			NP_001039040
A03048	NP_006563	XP_415686	NP_001120411	NP_001012243	XP_003964384
R03049	NP_004882	XP_001235164	XP_002938466	XP_003200410	XP_003962326
A03050	NP_612635		XP_002932652
A03052			NP_001107470	XP_002665864	XP_003978229
R03054		NP_001006546	XP_002932653	NP_001070634	XP_003971154
R03055	NP_006419	NP_001026530	NP_001016451	NP_001019570	XP_003968406
A03059	NP_001011551	XP_420333	NP_001004886	NP_955961	XP_003970598
A03060	NP_003579	XP_420335	NP_001120891	NP_001116316	XP_003970600
R03061	NP_054779	NP_001099145	NP_001006880	NP_957365	XP_003970599
R03062	NP_001116078	NP_001001749	NP_001116192	NP_955996	XP_003970651
R03064	NP_001135919	NP_001038116	XP_002931848		XP_003970601
R03065	NP_001098014	XP_420338	NP_001011501	XP_001922588	XP_003970652
A03066	NP_001171671	NP_001073197	XP_002931849	NP_001093478	XP_003970653
R03067	NP_001007532				XP_003970654
A03068		XP_001234244	XP_002940333
R03069	NP_075386	XP_003641170	XP_002940331	NP_957248	XP_003970655
R03070	NP_000991	NP_989603	NP_001165135	NP_001002078	XP_003970603
R03071				XP_001339865
A03072	NP_665798	NP_001026296	NP_001116199	NP_997791	XP_003970604
A03073	NP_001166959	NP_001012905	NP_001039125	NP_001004499	XP_003970605
R03074	NP_071409	XP_424063	XP_002937837	NP_001092251	XP_003961268
A03075	NP_056380	XP_416690	NP_001072745	XP_001340400	XP_003978695
R03076	NP_058636	XP_416692	NP_001072575	NP_001068583	XP_003968719
A03078	NP_001001992	XP_416693	NP_001072158
R03079	NP_006576	NP_001004389	NP_001007875	NP_957356	XP_003971223
R03080		XP_416695	XP_002939195
R03084	NP_001842	NP_001094381	XP_002939444	NP_998429	XP_003964234
R03085	NP_060802	NP_001006568	NP_989127	NP_001122187	XP_003973663
R03086	NP_006835	NP_001186557	NP_001120212	NP_956960	XP_003968314
A03087	NP_078832	NP_001041731	NP_001005046	XP_001339495	XP_003968303
R03088	NP_003130	NP_001034366	XP_002940432	XP_003200533	XP_003968304
R03089	NP_060017	XP_417855	NP_001096513	NP_001107050	XP_003971007
A03090	NP_001034750
A03091	NP_054745	XP_417859	XP_002940683	NP_991151	NP_001027822
A03100	NP_001138594	XP_001231758	NP_001008025	NP_001035341	XP_003978535
A03101	NP_078848	XP_419370	NP_001072369	NP_001038460	XP_003971547
A03103	NP_006606	XP_001231758	NP_001039108	NP_001138267	XP_003978624
A03109	NP_659457		NP_001120281	NP_001038595
A03110	NP_005715	NP_001244187	NP_001017023	NP_001002748	XP_003974835
A03112	NP_009122	NP_001186536	NP_001106386	NP_571304
A03113	NP_056094	XP_416071	NP_001039209		XP_003972787
A03114	NP_002067	NP_001186488	NP_001107314	NP_001025379	XP_003972788
R03115	NP_065392	NP_001006177	XP_002937586	NP_001124264	XP_003972789
R03116	NP_835463	NP_001007852	NP_001005644	XP_001331813	XP_003972790
A03118	NP_037386	NP_001186487	NP_001135652	NP_001038213
R03119	NP_000849	XP_425960	NP_001034818	NP_001002126	XP_003974229
A03126					XP_003962091
R03127	NP_001180414	NP_001001766	NP_001135570	NP_001019560	XP_003962081
A03130	NP_079544	NP_989870	XP_002935759	XP_001339492	XP_003971832
R03136	NP_072046	NP_001020003	XP_002942400	NP_001018150	XP_003962314
A03139	NP_612387	XP_417937		NP_001093489	XP_003971359
A03140	NP_073598	XP_417936	XP_002932963	XP_001334782
R03141	NP_001876	NP_990507	XP_002932964	NP_571232	XP_003966403
R03142	NP_001532	NP_001001527	XP_002932983	NP_001017744	XP_003977012
A03145	NP_001217	NP_990057	NP_001011068	NP_001018333	XP_003972493
R03146	NP_001257609	XP_420651	NP_001120048	NP_001070793	XP_003972492
R03148	NP_001036199	NP_001026306	XP_002939332	XP_001921634	XP_003970737
R03150	NP_071924	XP_415728	XP_002935847	XP_696189	XP_003968738
A03151	NP_008858	NP_990548	XP_002931706	NP_001004012	XP_003979059
R03152	NP_001128714	XP_418430	NP_001008146	NP_998513	XP_003968872
A03157					XP_003968921
A03167				NP_001073478
R03168	NP_001121	XP_003642896	NP_001039102	NP_570986	XP_003962827
R03172	NP_001544	XP_420577	XP_002940304	NP_998089	XP_003979427
R03179	NP_000971	XP_416064	NP_001016690	NP_957354	XP_003976423
A03182	NP_055325			XP_001921217
A03186	NP_001128206
A03189	NP_001093646	XP_003643087	XP_002938530	NP_001038663	XP_003974075
R03190	NP_006388		NP_989146	NP_956520	XP_003976099
R03191	NP_000794	NP_990794	NP_001107368	NP_001018566	XP_003968381
R03192	NP_079422	NP_001025949	NP_001011131	NP_001003623	XP_003967974
R03194				XP_003198120
R03196	NP_001165415	XP_414757	XP_002941852	NP_001018145	XP_003964671
R03198	NP_005435	NP_001006521	NP_989024	NP_999925	XP_003966448
A03206	NP_002187		NP_001076827	NP_991207	XP_003971447
A03207		NP_001186619	XP_002941644	XP_682857
A03208	NP_015556		NP_989245	NP_001107063	XP_003961325
A03209	NP_115599	XP_423893		XP_001923995	XP_003971336
R03216	NP_057382	XP_424000	XP_002941894	NP_001107129	XP_003968700
R03217	NP_006092	NP_989808	NP_001011162	NP_001003863	XP_003974826
A03218	NP_005636	NP_001006252	NP_001016066	NP_001004665
A03219	NP_002255	NP_001025945	NP_989192	XP_701359	XP_003968045
R03220	NP_055182	XP_416495	XP_002943177	NP_001082812	XP_003968046
A03221	NP_001017928	XP_416494	NP_001016242	NP_957101	XP_003968047
R03222	NP_000091	NP_001185577	NP_001123784	NP_001096599	XP_003967998
R03228		XP_421101		NP_001071247
A03233	NP_055157	NP_990139	NP_989114	NP_571457	XP_003978815
A03237	NP_037459	XP_416459	NP_001005624	NP_956020	XP_003967160
R03238	NP_056195	XP_416458	NP_989138	NP_956436	XP_003967253
R03240			XP_002938143
R03242	NP_006157	NP_990600	XP_002938118	NP_001017565	XP_003978436
A03243		XP_001234928
R03248	NP_001001329				XP_003964886
A03250	NP_001138246	NP_990161	NP_001096525	NP_001231529	XP_003974171
R03257	NP_001243525	XP_423439	XP_002934146
R03259	NP_005857	NP_001257486	NP_001008207	NP_957271	XP_003976901
A03261	NP_000208	XP_425660	XP_002932344	XP_001334455	XP_003967551
R03263	NP_000467	NP_990440	NP_001006817	NP_001003993	XP_003965209
R03264	NP_001252	NP_001006201	NP_001005448	NP_997756	XP_003965097
R03265	NP_001257321	XP_420607	NP_001006706	NP_001038804	XP_003974807
R03266	NP_000468	NP_990592	NP_001004887	NP_001002568
A03269			NP_001015745
A03270	NP_001188258	XP_420586	NP_001015950	NP_997874	XP_003965204
R03271	NP_071935	XP_424416	NP_001120306	NP_001018540	XP_003978140
R03274		XP_416954	NP_001016310	NP_001103590	XP_003961819
A03275	NP_078813	XP_416955	XP_002933053	XP_682732	XP_003977638
R03276	NP_937862	XP_416956	NP_001090790	NP_001035446	XP_003961762
A03277	NP_000962	NP_001006345	NP_001005020	NP_998809	XP_003977396
A03278	NP_003327	NP_990196	NP_001004868	NP_956013	XP_003970606
R03281	NP_663788	XP_416958	XP_002932671	NP_001008624	XP_003961792
A03283			NP_988883
R03288		NP_990574	NP_001182697	NP_001132952	XP_003968635
R03289	NP_001157	NP_001007823	NP_001005449	NP_919376	XP_003971220
R03293	NP_116161	XP_001233457	NP_001072698	NP_942137	XP_003964048
A03295	NP_001139784	NP_001074184		XP_002663902	XP_003978323
A03297	NP_001009185	XP_414641	NP_001006830	NP_001004599	XP_003976262
R03301	NP_060860	NP_001122109	XP_002937029	XP_691942	XP_003973946
R03302	NP_036359	XP_416868	XP_002937028	XP_691680	XP_003973948
R03303	NP_001036216	XP_420331	NP_001121432	XP_686812	XP_003970593
R03306	NP_149108	XP_415396	NP_001011054	NP_957087	XP_003965629
A03307	NP_002920	NP_990026	XP_002937018	NP_001029353
A03308	NP_000696	NP_989749	NP_001005806	NP_571913	XP_003971281
R03309	NP_009042	XP_416938	NP_001011211	NP_998657	XP_003961776
R03314	NP_060182	XP_003643724		NP_001018362	XP_003967123
R03316	NP_003816	NP_001186595	NP_001107340	NP_956484	XP_003962445
R03317	NP_694992	NP_001186597	NP_001120199	NP_001002627	XP_003962849
R03318	NP_060567	NP_001186596	NP_001015864	NP_001188359
A03319	NP_001207413
R03320	NP_006812	XP_421169	NP_001120006	XP_696711	XP_003971843
R03321	NP_000630	NP_001026730	XP_002940097	NP_998024	XP_003968206
A03324	NP_005109	NP_001019749	XP_002940097		XP_003966894
R03326	NP_001670	NP_990866	NP_989087	NP_571745	XP_003975824
R03327	NP_001171610	NP_001171642	NP_001011211	NP_937851	XP_003961776
A03329	NP_001036069	XP_422596	XP_002937144	NP_957327	XP_003975589
A03330	NP_001175	XP_003641789	XP_002937136	XP_696163	XP_003962454
A03331	NP_001138791	NP_990678	NP_001025699	NP_001002326	XP_003971153
R03334	NP_037495	XP_426680	NP_001005804	NP_956754	XP_003968073
A03337	NP_004258	XP_003641807	NP_001017162	NP_001073464	XP_003968071
R03338	NP_006323	XP_418246	NP_001017196	NP_001006057	XP_003975765
A03341			NP_001017229
R03344	NP_057119	XP_415503	NP_001016225	NP_001108192	XP_003965520
A03346	NP_899064			NP_001124069
A03347	NP_001597	XP_003642316	XP_002942020	XP_001344954	XP_003972630
R03348	NP_001005353	XP_422526	XP_002931643	NP_998464	XP_003974456
R03351	NP_059996	NP_001007959	NP_001017102	NP_001017787	NP_001129622
A03352	NP_002294	NP_989654	NP_001037866	NP_001106847	NP_001124341
A03358	NP_115667		XP_002931662
A03359	NP_003483		XP_002937275	XP_001341471
A03362	NP_004628	XP_003642026	NP_989167	NP_957222	XP_003973592
A03363	NP_001034892	XP_001234587	NP_001017219	NP_001008655	XP_003962952
R03368	NP_001028219	XP_420498		NP_001002457	XP_003972489
R03371	NP_001135943	XP_420500	NP_001072325	NP_001002161	XP_003972436
A03372	NP_001229658	XP_426302	XP_002934822		XP_003972487
R03373	NP_789845	XP_001232700	NP_001017130	NP_991225	XP_003972486
R03375	NP_060641	XP_003640457	NP_001106389	NP_001121547	XP_003967675
A03376	NP_056090	XP_003640439		XP_694117	XP_003967427
R03377	NP_001029345	XP_003640473	XP_002938116	XP_002661418	XP_003972661
A03382	NP_000519	XP_420805	NP_001072469	NP_001014354	XP_003972325
R03383	NP_001129507			XP_685886	XP_003972324
A03384	NP_443108	NP_001025852	NP_001184134	XP_001922147	XP_003964582
R03385	NP_071751	NP_001001529	NP_001090700	XP_002663865	XP_003976214
A03387	NP_031378	NP_001027562	XP_002942673	NP_001003737	XP_003973964
A03391	NP_065202	NP_001025854	NP_001017300	NP_956623	XP_003973449
A03394	NP_001229679	XP_003642586	NP_001119978	NP_001182175	XP_003977847
R03397	NP_004872	XP_419987	NP_001072223	XP_001336816	XP_003978596
A03398			XP_002936024
R03399	NP_955378	XP_001232422	XP_002936025
A03400	NP_001139182	XP_419988	NP_001120054
R03402	NP_006268	XP_419989			XP_003963967
R03404	NP_003194	XP_416707	XP_002936033	NP_001103577	XP_003978625
A03405	NP_055578	XP_420071	XP_002936026	NP_001003544	XP_003971940
R03407	NP_064571	XP_418673	XP_002938764	NP_001005926	XP_003969196
R03411	NP_057531	XP_418721	NP_001017060	NP_001243118	XP_003969307
R03412	NP_001120925	NP_001006361	XP_002933445	NP_001001947	XP_003966235
R03416	NP_061820	NP_001072946	NP_988895	NP_001002068	XP_003963850
A03420	NP_060811	XP_419594	XP_002931563
A03421	NP_777570
R03422	NP_056986	XP_003640895	XP_002931578	NP_001157866	XP_003965885
A03423	NP_005646	XP_427148	XP_002931580	NP_001038406	XP_003962740
R03425	NP_056962	NP_001008729	NP_001007944	NP_001007160
A03427	NP_114439	XP_003642258	XP_002931943	XP_688779	XP_003973360
R03428	NP_004138	NP_001027533	NP_001016294	NP_956332	XP_003965619
R03429	NP_001157973	XP_415254			XP_003973287
A03430	NP_055590	XP_425281		XP_688629
A03438				XP_003198185
R03441	NP_001248	NP_001001760	NP_001096548	XP_687082	XP_003977706
A03444				XP_002665919
A03445			XP_002943471
A03446				NP_001095865	XP_003978211
R03447	NP_065995	XP_003642968		XP_687652	XP_003975986
R03448	NP_001073965	NP_001026782	NP_001011354	NP_001002608	XP_003975981
A03449	NP_001037729	XP_001233141	XP_002936007	XP_001337621
A03450	NP_115982	XP_003643021	NP_001016165	NP_001077041	XP_003975269
A03453	NP_000144	XP_421304	NP_001072270	NP_998276	XP_003976870
R03455	NP_006747	NP_001006387	NP_988887	NP_956288	XP_003975497
R03456	NP_006321	XP_001233657	NP_001005699	NP_957043	XP_003968125
A03457	NP_054894	NP_001006388	NP_001120107	NP_001003435	XP_003968127
R03458	NP_071899	NP_001034415	NP_989425	NP_571362	XP_003968128
R03472	NP_000534	XP_003640663	XP_002943546	XP_683907	XP_003971403
A03473			XP_002942454	XP_001919585
R03474	NP_001666	NP_990211	NP_001004785	NP_001096662	XP_003964479
R03475	NP_061881	XP_416248	NP_001025525	NP_001077309	XP_003964464
R03476	NP_065141	NP_001185817	NP_001185822
R03477	NP_057175	NP_001012553	NP_988980	NP_998293	XP_003963717
R03479			NP_001120181	NP_001096608
A03480	NP_073603	NP_001026511	XP_002939643		XP_003963234
A03481	NP_036192	NP_001073190	XP_002942336	NP_957216	XP_003967544
R03482	NP_001164603	NP_001091115	NP_001007862	NP_957094	XP_003963231
R03485	NP_001123577	XP_424796	NP_988844	NP_001017914	XP_003965378
R03486	NP_000850	NP_989816	XP_002934890	NP_001119931	XP_003974515
R03489	NP_057675	XP_003643009	XP_002934887	NP_963877
A03491	NP_006180		NP_989065	NP_775388
A03495	NP_003256	NP_001011691	XP_002934448	NP_001013287	XP_003972357
A03498	NP_057196		XP_002936910	XP_695404	XP_003963773
A03500	NP_660161	NP_989999	XP_002936902	NP_571707	XP_003963774
R03501	NP_001243196	XP_421565	XP_002936911	XP_700400	XP_003963775
R03502	NP_056416	XP_001231234	NP_001122122	XP_685685	XP_003963719
R03503	NP_001853		XP_002936901	NP_001038822	XP_003963720
A03504	NP_068572	NP_001186459	XP_002936903	XP_001334518	XP_003963739
R03505	NP_064583	XP_418080	NP_001135506	NP_001004551	XP_003964976
R03506	NP_057444		XP_002935572	NP_001076342	XP_003961431
R03511	NP_003320	NP_990784	NP_001123670	NP_956317	XP_003978604
R03520	NP_036562	NP_001006526	NP_001006818	NP_955992	XP_003962201
A03522		XP_414887			XP_003961502
A03526	NP_001121070	NP_001025513	NP_001107144	NP_001001815	XP_003967407
R03530	NP_005598	NP_990766	XP_002934523	NP_942114	XP_003966082
A03536	NP_149111	XP_414094	NP_001016798	NP_001091055	XP_003966226
R03540	NP_071902	XP_426628	NP_001016199	NP_001083011	XP_003975590
A03541	NP_940895		XP_002934185	NP_001018606
A03542	NP_002176	NP_001073575
A03545	NP_777574		XP_002942805
R03546	NP_001007528	NP_001026750	NP_001123692	NP_956238	XP_003965203
A03547	NP_005974	NP_001007983	NP_001135611	NP_001076306	XP_003965141
R03548	NP_001078880	XP_425010	NP_001072687	NP_001003465	XP_003965140
R03550	NP_001154901			NP_957434	XP_003975438
A03557	NP_056053	XP_414499	NP_001096212	XP_689275	XP_003970912
R03558	NP_002878	NP_001025778	NP_989403	NP_956342	XP_003970893
A03559	NP_872584	XP_420693	XP_002938104	XP_694618	XP_003968678
A03566			XP_002942314
R03568	NP_057506	NP_001007926	NP_001015701	NP_001007291	XP_003967813
R03570	NP_001115	XP_420975	XP_002936787	XP_684417
A03574	NP_620159	XP_423668	NP_001123849	NP_001103955	XP_003966889
A03579	NP_714916	XP_003640613	NP_001120575	NP_001092215	XP_003967162
R03583	NP_036545	XP_419527	NP_001017245	NP_001038418	XP_003962610
R03585	NP_004492	XP_419539	NP_001090833	NP_001028767	XP_003971535
A03586	NP_115704	XP_419538	XP_002931529	XP_686288	XP_003969546
A03589	NP_060482	XP_003641032	XP_002931555	XP_698032	XP_003969593
A03593	NP_114437	XP_419145	XP_002938956	XP_001341669	XP_003968139
R03597	NP_062830	NP_990290	XP_002938953	XP_002663066	XP_003968140
A03599	NP_005540	NP_989793	XP_002938481	XP_002667319	XP_003963361
A03600	NP_004965	NP_989794	XP_002938475	NP_001104640	XP_003973122
A03601	NP_002223	NP_001025549	XP_002938474	XP_001922996	XP_003963334
A03602		XP_429706	NP_001120134
R03605		XP_424134	NP_001107326	NP_997908	XP_003973120
A03606	NP_057219		NP_001016880	NP_001076493
R03607				NP_001122287	XP_003963364
R03608	NP_775833	XP_417950	XP_002936786	NP_001103929
R03609	NP_009202	XP_003642769	XP_002938476	NP_998621	XP_003963090
A03610		XP_003642785
A03612	NP_078917	XP_419831	XP_002934916	NP_001038579	XP_003969116
A03614	NP_000005	XP_416476	NP_001107696	XP_001921519	XP_003977064
R03620	NP_665807	NP_990217	NP_989406	NP_998137	XP_003972762
R03624	NP_001138936		XP_002932535
R03630	NP_002743	NP_990426	NP_001107691	XP_001919688	XP_003965227
A03632	NP_940898	XP_421769		XP_695815
A03633				XP_003199056	XP_003966767
A03642	NP_001030013		XP_002932266	XP_683287	XP_003964036
A03643		XP_415640	XP_002932265		XP_003972596
A03647	NP_057222	XP_414911	NP_001016068	NP_001076480	XP_003972595
R03652	NP_004699	XP_414127	NP_001017011	NP_957471	XP_003970038
A03653		XP_425119	XP_002934429	XP_001920988	XP_003967583
A03654	NP_001166245	XP_001231905	XP_002934430	XP_001337404	XP_003969451
A03655	NP_001129628	XP_414126	XP_002934420	XP_003199041	XP_003969452
A03657	NP_000518	NP_990517	XP_002942891	NP_001243322	XP_003972640
A03660			NP_001107134
A03661	NP_612367		NP_001011059	NP_001018397	XP_003964363
R03662	NP_061855	XP_422486	XP_002931506	NP_001003500	XP_003964362
R03663	NP_954592	XP_423669	XP_002942888	NP_001003645	XP_003964315
A03665	NP_001002913		XP_002935937		XP_003974727
A03666			XP_002935201	XP_002662229
A03667	NP_001078816	XP_415507	NP_001090629	NP_001029352	XP_003974726
A03669	NP_116198	XP_425337			XP_003965339
R03670	NP_064530	NP_001006200	NP_001015802	NP_957413	XP_003965102
A03671	NP_056169	NP_001025861	NP_001107292	XP_001923018	XP_003965334
A03675					XP_003979073
A03676	NP_001073929	XP_422802	XP_002931612	NP_001038251	XP_003971989
R03680	NP_001185922	NP_001026041	NP_001004896	NP_001073471	XP_003975430
A03681	NP_055188	XP_422799	NP_989321	NP_001122289
R03682	NP_079223	XP_426714	XP_002931614	XP_686357	XP_003976131
R03683	NP_001234937	NP_990505	XP_002931592		XP_003975457
A03687	NP_001165378	XP_001234388	XP_002940483	NP_001017643
R03688	NP_149099
R03689	NP_115897	XP_420360	NP_001016324	NP_956731	XP_003966903
R03690	NP_001257306	XP_003640890	NP_001093736	NP_991159	XP_003966902
A03691	NP_000193	XP_420361	NP_001184061	NP_001073537	XP_003970139
A03695		XP_415100		XP_684556	XP_003975275
A03698				XP_003198660
A03702	NP_542193	NP_001035209	NP_001017089	NP_001082804	XP_003974825
A03703		XP_415094		XP_003199178	XP_003974557
R03704	NP_116045	XP_415104	XP_002935332	NP_001076473	XP_003974980
R03705	NP_478059	XP_424846	NP_001016582	NP_956113	XP_003978374
A03706	NP_079390	XP_416130		NP_001161739	XP_003967774
A03707	NP_001009894	XP_416129	NP_001121420	NP_001008606	XP_003967816
R03716	NP_001188465	XP_419400	XP_002940745	NP_001038739
A03717					XP_003971850
R03719	NP_006002	NP_001001604	NP_001072338	NP_705948	XP_003967082
R03720	NP_073742	XP_419398	NP_988934	NP_957084	XP_003971849
A03721	NP_653296	XP_419397	NP_001096412	NP_001007428	XP_003971409
R03723	NP_001929	NP_001008478	NP_001039251	NP_001070782	XP_003978441
R03725	NP_001248339	XP_422334	NP_001090734	NP_001107092	XP_003977541
R03733	NP_057525	NP_989756	XP_002936419	NP_997986	XP_003962642
R03735	NP_057019	XP_003641702	NP_001107964	NP_001038234	XP_003974012
A03736	NP_258412	XP_422234	XP_002934214	NP_001093456	XP_003973911
R03737	NP_003753	XP_001233852	NP_001016897	NP_957029	XP_003973912
R03745	NP_061816	XP_419249	NP_001015934	NP_997937	XP_003966623
R03746	NP_001121121	XP_416396	NP_001165772	NP_956214	XP_003972812
A03748	NP_085150	XP_416344	NP_001072664	NP_001189348	XP_003972817
A03753	NP_057245	XP_426692	XP_002938167
R03754	NP_116287	XP_001232789	NP_001107342	NP_001028906	XP_003973997
A03755	NP_060331	XP_003641779	NP_001004985	NP_001119908	XP_003973998
A03756				NP_001020627
R03760	NP_005517	NP_001165845	XP_002942927	NP_571675	XP_003969203
R03761	NP_056016	XP_423665	NP_001096309	NP_001071203	XP_003969204
R03762	NP_001008272	NP_989584	XP_002942929	NP_001076538	NP_001072047
A03763	NP_115826				XP_003966003
R03772	NP_001135826	NP_001025511	NP_001119980	NP_001185479	XP_003971212
A03773	NP_689522	NP_989681	XP_002936021	XP_001342084	XP_003963766
A03779	NP_036597			NP_571085	XP_003976258
A03781	NP_001864	XP_420392	NP_001106417	NP_999975	XP_003972473
R03785	NP_149129	NP_989489
R03789	NP_003358	NP_001007486	NP_001007857	NP_001116257	XP_003969285
R03790	NP_066998		NP_001090729	NP_991146	XP_003965681
R03791	NP_001976		NP_989154	NP_998163	XP_003965680
A03793	NP_001094842	NP_990018	XP_002938252	NP_001017775	XP_003965697
A03798	NP_056289	NP_001026016		NP_001153405	XP_003980000
A03800			XP_002940871	NP_001121840	XP_003969411
R03802			XP_002940871	NP_001121840	XP_003969411
A03803			XP_002939188
R03804	NP_006588	NP_990334	XP_002937941	NP_956908	XP_003966054
R03805	NP_062558		XP_002939184	XP_692288	XP_003978648
A03808				XP_001338197	XP_003979936
R03809	NP_919261			NP_001153443
R03810	NP_001035787	XP_003641386	NP_001007958	NP_001003619	XP_003967411
R03811	NP_006283	XP_003641390	NP_989266	NP_001002089	XP_003967414
R03812	NP_001158886	NP_990615	NP_989153	NP_571321	XP_003967413
A03821	NP_065949	NP_990069	XP_002942987	NP_001103636	XP_003963203
R03822	NP_001002258	XP_421992	NP_001005087	NP_571836	XP_003961882
R03823	NP_006847	XP_003643883	NP_001039217	NP_001025376	XP_003963147
R03824	NP_001122386	XP_423701	NP_001005451	NP_957486	XP_003963497
A03826	NP_005905	XP_424376	NP_001005655	NP_944595	XP_003975309
R03830	NP_005186	NP_001026630	NP_001025585	NP_571962	XP_003975311
R03833	NP_079345		NP_001025678	NP_942137	XP_003964048
R03837	NP_060556	XP_428847	XP_002933753	NP_001018411	XP_003961981
A03843	NP_004301	XP_426342	NP_001120435	XP_002660498	XP_003972210
A03844	NP_060051	NP_990091	XP_002942918	XP_001920894	XP_003970415
R03848	NP_001138778	NP_001007893	XP_002934637	NP_001137525	XP_003969443
R03853	NP_000100	NP_990630			XP_003966571
A03857	NP_001171564	XP_416424	NP_001096227	NP_956358	XP_003965060
A03864	NP_036422	XP_426581	XP_002934666	NP_001020122	XP_003961968
R03865	NP_056345	NP_001012612	NP_001004798	NP_956997	XP_003975920
A03870	NP_061174	XP_417997		NP_001070839	XP_003973499
R03871	NP_004176	NP_989667	XP_002932162	NP_001037809	XP_003963338
A03872	NP_620057	NP_989953	NP_001016999	NP_001035426	XP_003973469
R03874	NP_006126	NP_990846	NP_001017324	NP_997862	NP_001232025
R03875	NP_001123551	NP_001012861	XP_002932163	XP_002662576	XP_003973167
R03876	NP_001655	NP_990035	NP_001016569	NP_001002445	XP_003973278
R03877	NP_848634	XP_418001	XP_002932164	NP_001124267	XP_003973166
R03878	NP_001127810	XP_003641310	XP_002936407	NP_001007353	XP_003972431
R03885	NP_001025055	XP_419671		XP_684692	XP_003971938
A03886	NP_002531	NP_001012817	NP_001098755	XP_001332564	XP_003974718
A03887			NP_001090778
R03888	NP_001003722	XP_415496	XP_002935547	NP_001003885	XP_003974719
R03889	NP_001123910	NP_001036003	NP_001090674	NP_001091958	XP_003965191
R03891	NP_443076	XP_415494	NP_001006746	NP_001099160	XP_003965149
R03892	NP_003002	NP_001025862	NP_989041	NP_958876	XP_003974589
R03893				NP_001121712	XP_003974717
R03895	NP_000662	NP_001026323	NP_001011502	NP_571924	XP_003970626
A03902	NP_000091	NP_001185577	NP_001123784	XP_003201355	XP_003967998
R03904	NP_653187	XP_003641640		XP_002662273	XP_003966741
R03907	NP_079457		NP_001135524	XP_002664257	XP_003962238
R03908	NP_005712	NP_989638	NP_989368	NP_001003944	XP_003966718
R03909	NP_958436	NP_989615	NP_001093705	NP_998130	XP_003977571
A03915		NP_001072952		XP_002664894
R03920	NP_001186481	XP_003641979	NP_001008102	NP_001038512	XP_003973632
R03921	NP_775930	XP_001231937	XP_002933094	NP_001003495	XP_003973330
A03922	XP_003960870		NP_001121450	NP_001038770	XP_003973195
A03923	NP_005709	NP_001244213	NP_001004844	NP_001003762	XP_003973245
R03924	NP_006345	XP_414389	NP_001008040	NP_956220	XP_003973518
R03926	NP_056988	NP_001033585	XP_002937905		XP_003966679
R03927	NP_001032961	NP_001025982	XP_002937904	NP_001116772	XP_003961849
R03929	NP_004314	NP_001103162	XP_002939543	NP_001092206	XP_003975493
R03930	NP_076996	XP_419017	NP_001135619	XP_001338251	XP_003968141
A03933	NP_006369	XP_424426		XP_003200859	XP_003965255
A03934		XP_424425	NP_001090731		XP_003975272
R03935	NP_001818	XP_001231967	NP_001016170	NP_001002110	XP_003969389
R03941	NP_005715	NP_001244187	XP_002934840	NP_001020709	XP_003969555
R03942	NP_001410	NP_990164	NP_001005461	NP_571527	XP_003977185
A03943	NP_006662	XP_425882	XP_002934850	NP_001177745	XP_003977184
A03944			XP_002934838
R03946	NP_001026851	XP_415851	NP_001072618	NP_001018407	XP_003973840
R03947	NP_055419	XP_415850	NP_989230	NP_998635	XP_003974198
A03948	NP_473454	XP_418267	NP_001011260	XP_003198013	XP_003975437
R03951	NP_003281	NP_001232856	NP_001017087	NP_998323	NP_001027743
R03953	NP_000228	NP_990613	XP_002934038	NP_571202	XP_003974175
R03954	NP_000228	NP_990613	XP_002934038	XP_002666287	XP_003974201
A03955	NP_001101	NP_989592	NP_001037869	NP_001152786	XP_003974200
R03956	NP_055464	XP_423726			XP_003974202
A03957	NP_001007526		XP_002934424		XP_003977567
R03958	NP_076979	NP_001073226	NP_988996	NP_957194	XP_003974360
R03959	NP_077009	XP_418258	NP_989317	NP_001185672	XP_003974372
R03960	NP_004822	XP_001234571	NP_001016996	NP_998224	XP_003974371
A03962	NP_006378	XP_001233544		NP_956368	XP_003973848
A03963	NP_115583		XP_002942253
R03964	NP_004334	XP_418262	NP_001001253	NP_958873	XP_003975434
A03965	NP_002865	XP_429175	NP_001025578	NP_001032776	XP_003965248
A03966	NP_001245303	XP_418263	NP_001121513	XP_696575	XP_003973850
R03967	NP_057354	XP_418264	NP_001016764	NP_571932	XP_003975435
A03969	NP_115882	NP_001007887	NP_989033	NP_001107913	XP_003975436
R03970	NP_006708	NP_989522	NP_001017097	XP_001331783	XP_003974057
R03971	NP_991330	XP_003642891	XP_002936370	NP_001038338	XP_003974056
A03972		NP_001001201	NP_001090784	NP_001099077	XP_003974112
R03974	NP_001159755	NP_989868	NP_989056	NP_955867	XP_003974111
R03975			XP_002936699
R03977	NP_060362	XP_003641680	NP_001243870	NP_938170	XP_003962022
R03981	NP_005834	NP_001012940	XP_002936702	NP_956414	XP_003962205
A03983	NP_000717		NP_001135623	NP_001106991	XP_003962206
R03984	NP_036229	XP_003641657	XP_002936704	NP_001002339	XP_003962208
A03992	NP_001163935	XP_416161	NP_001090785	NP_001188286	XP_003973000
A03995			XP_002939800
R03996	NP_000745	XP_001233014		NP_001077312	XP_003973723
R03997	NP_037507		NP_001234912	NP_001018383	XP_003979992
A03998	NP_001036783	XP_421167	XP_002933765		XP_003962439
R03999	NP_001139626	NP_001026366	NP_001072802	NP_001243152	XP_003962440
A04000	NP_113627	XP_001234628	NP_001016326	NP_001074219	XP_003971711
A04001	NP_001035121			XP_002665172	XP_003966547
R04003	NP_036463	XP_420035	XP_002933632	NP_001076362	XP_003962776
R04007	NP_000576	NP_989484		NP_001034654	NP_001028220
R04009	NP_919267	NP_001026678	NP_001120365	NP_001122284	XP_003966071
R04012	NP_001093115	XP_003641825	NP_001011427	NP_001038800	XP_003968232
R04013	NP_001137232	NP_990863	NP_001004855	NP_998350	XP_003966932
A04022		NP_989710		NP_001002593	XP_003968206
A04033			NP_001135464
A04034	NP_570924	XP_003643041		XP_001920953
A04035	NP_055830	XP_001233692	NP_989064	NP_001076274	XP_003978930
A04036	NP_001041666	XP_418269	XP_002940183	XP_003201004	XP_003974362
A04037	NP_001197	XP_425065	NP_001093690	NP_001070240	XP_003967604
R04038	NP_001123583	XP_003642904	NP_001004867	NP_001082792	XP_003974160
R04039	NP_001095890	XP_430423	NP_001017128	NP_998204	XP_003974159
R04040	NP_008845	XP_003642912	XP_002938868	XP_690743	XP_003974157
R04041	NP_001310	XP_003642911	NP_001135530	NP_001019550	XP_003978108
R04043	NP_951009	XP_426826	NP_001072772	NP_919383	XP_003978110
R04044	NP_570719	XP_003642903	NP_001011080	NP_956010	XP_003978111
R04045	NP_003929	XP_003642902	XP_002937985	NP_001038480	XP_003974178
A04046	NP_115871	XP_003642910	XP_002937984	XP_001919781	XP_003974099
R04047	NP_060519	NP_001026674	NP_989166	NP_998453	XP_003975701
R04048		NP_001004397		NP_957337	XP_003975700
A04053	NP_001245211	XP_418194	XP_002937983	XP_001919207	XP_003974102
A04055	NP_588608	NP_001008462	NP_001072419	NP_899188	NP_001035912
A04060	NP_002488	NP_001026221	NP_001164656	NP_957344	XP_003971899
R04061	NP_055688	NP_001026220	XP_002934742	NP_001025129	XP_003971864
A04077				XP_003198891
R04079	NP_003977	XP_424543	NP_001120574	NP_001017717	XP_003969838
R04083	NP_001028254	XP_425790	NP_001011144	NP_001038607	XP_003969012
R04086	NP_001132938	NP_001153226	NP_001120367	NP_001076463	XP_003961866
A04094	NP_056045	XP_426346		XP_688145
A04102	NP_037504	NP_990309	NP_001093701	XP_001344700	XP_003962645
R04103	NP_001138229	XP_001233027	NP_001072162	NP_957020	XP_003971805
A04104	NP_055598	NP_001006479	NP_001121463	NP_001180468	XP_003962644
A04109	NP_001120830	NP_001006226	XP_002933144		XP_003972862
R04110	NP_116325	NP_001186406	NP_001120020	NP_001003481	XP_003972859
R04111	NP_940869	XP_001231903	NP_001017304		XP_003967374
R04117	NP_001099036	XP_418923	XP_002932725	XP_002665108	XP_003966230
R04118	NP_003496	NP_001025508	NP_001008449	NP_001124086	XP_003962094
A04123	NP_003764	XP_001233420	XP_002935681	NP_001074140	XP_003967307
R04124	NP_001186945				XP_003963078
A04125	NP_149349	XP_001233420	XP_002935681	NP_001074140	XP_003967307
R04126	NP_001139786	XP_003642029	NP_001120173	NP_956661	XP_003973378
R04127	NP_056222		XP_002935661	NP_996949	XP_003973345
R04128	NP_000657	XP_003642033	NP_001011406	NP_957289	XP_003973346
A04135	NP_001003794	XP_414365	NP_001106390	NP_956591	XP_003963079
R04136	NP_742024	NP_001025769	NP_001096209	XP_003199099	XP_003963427
R04139	NP_001129525	NP_001025770	NP_001123806	NP_001025422	XP_003978017
A04147	NP_612200	XP_001231524	XP_002935857	NP_001076369	XP_003977042
A04148	NP_612200	XP_001231524	XP_002935857	NP_001076369	XP_003977042
R04150	NP_439896	XP_419737	NP_001015938	NP_001017841	XP_003962310
R04151	NP_000619	NP_990188	NP_001165294	NP_001077337
R04152	NP_006125	XP_003640540	NP_001016287	NP_998694	XP_003979783
A04155	NP_056315	XP_416741		NP_001070851	XP_003976633
R04156	NP_001092143	XP_003643528	NP_001016820	NP_001032316	XP_003976629
R04157	NP_001091872	XP_425556	NP_001090699	XP_695193	XP_003976634
A04158	NP_653322				XP_003963690
A04168	NP_079410	XP_414088	XP_002936158	XP_001922536	XP_003969600
A04171	NP_003830	XP_001233219
A04174	NP_004239	NP_001120643	XP_002933014	NP_001034615	XP_003965535
R04176	NP_006708	NP_989964	NP_001017097	XP_001331783	XP_003974576
R04181	NP_000654	XP_414940	NP_001121529	NP_958906	XP_003966444
R04184	NP_001002295	NP_001008444	NP_001004967	NP_571286	XP_003972734
R04185	NP_114129	NP_001026012	XP_002931901		XP_003967698
R04188	NP_001001973	XP_001231450	NP_001016407	NP_956335	XP_003972737
R04189	NP_036443	XP_417297	NP_001004824	NP_001025257	XP_003972738
R04195	NP_079187	NP_001026465	NP_001016910	NP_998311	XP_003975754
A04196	NP_060064	XP_423026	NP_001107372	XP_689432	XP_003962588
A04201			XP_002934144
R04202	NP_776172	XP_421117	XP_002934124	NP_001003734	XP_003966431
R04205	NP_004299	XP_426422	NP_001008141	NP_001017781	XP_003977636
R04207	NP_006539	XP_003641794	NP_001017139	NP_001108030	XP_003961994
A04209	NP_001229243	XP_422689	XP_002936577	XP_696830	XP_003962035
A04210	NP_055336	XP_003641592	NP_001011179	NP_991316	XP_003966723
R04211	NP_001002880	XP_001234193	NP_001016253	NP_001003838	XP_003961405
R04215	NP_006846	NP_001013014	NP_001008052	NP_956934	XP_003964300
A04216				XP_002667184
R04218	NP_689920	XP_421570	NP_001135682	NP_991112	XP_003964110
R04219	NP_001073918	NP_001006497	XP_002936016	XP_687974	XP_003969530
A04220	NP_071412	XP_421566	NP_001107317	NP_001019582	XP_003969511
R04221	NP_036339	NP_001012610		NP_001035439
A04223	NP_036471	NP_001006499	NP_001039054	NP_001017773	XP_003969528
R04225	NP_963883	NP_990356	NP_001027475	NP_001076409	XP_003979514
R04227	NP_071939	XP_421759	NP_001090863	NP_001191086	XP_003961235
A04233	NP_859528	XP_419178	NP_001072846	NP_001038457	XP_003963605
A04237	NP_000952	NP_001005571	XP_002933228	NP_001103758	XP_003973292
A04239	NP_001004439	XP_413930	XP_002932992	NP_001166098	XP_003969862
R04253	NP_995325	NP_998745	NP_001165127	NP_001183982
A04254	NP_001185903	NP_001026013	NP_001005033	NP_956761	XP_003973546
A04255	NP_057413	XP_414254	XP_002931917	XP_003199528	XP_003973547
A04256	NP_060487	XP_421767		XP_685206	XP_003961636
A04257	NP_942090	XP_421768		NP_001157500	XP_003961635
A04258	NP_940898	XP_421769		XP_695815	XP_003961634
R04265	NP_002830	XP_003643041	XP_002931630	NP_001077045	XP_003967036
A04267	NP_068761	NP_001026707	XP_002934306	NP_955920	XP_003977089
A04269	NP_003051	NP_001039293	XP_002934410	NP_957143	XP_003971054
A04270	NP_000255	NP_990291	XP_002935019	XP_001922161	XP_003974905
A04271	NP_000127	NP_001006587	XP_002935027	NP_001035727
A04280			XP_002940817
R04282	NP_071942	XP_414461	XP_002938273	NP_001017590	XP_003963447
R04283	NP_071735	XP_414460	XP_002938281	XP_697706	XP_003963469
A04284	NP_009048	NP_001025554	NP_001106463	NP_001012365	XP_003963468
R04285	NP_001017395	XP_414456	NP_001136386	NP_001073477	XP_003973279
A04288					XP_003971534
A04289				XP_003200361
R04290	NP_006786	NP_001026211	NP_001006734	NP_001004578	XP_003970287
A04291	NP_001041683		NP_001016149	XP_001332508	XP_003970280
R04292	NP_114110		NP_001072175	XP_687842	XP_003971132
A04293	NP_001138938		XP_002936512
A04294	NP_695008	NP_001186367	XP_002937540	NP_996960	XP_003971214
A04295			XP_002931611	XP_003200465
R04298	NP_009148	NP_001006554	NP_001006850	NP_956849	XP_003962582
R04299	NP_001116224	NP_001004411	NP_001116965	NP_001122164	XP_003976318
R04300	NP_062815	XP_416530	NP_001186854	NP_001001849	NP_001027938
A04301		XP_422808
R04304	NP_001127704	NP_001012576	NP_001016812	NP_001038517	XP_003977745
A04306					XP_003965202
A04309	NP_000084	NP_990121	XP_002934400	XP_002665924	XP_003965363
R04310	NP_006325			NP_001003486
R04313	NP_060217	NP_001191026	NP_001191021	NP_001186697	XP_003970517
R04315	NP_003723	XP_424384	NP_989333	NP_955977	XP_003970590
A04316	NP_004318	XP_415244	NP_001123792	XP_002665983	XP_003974617
A04319	NP_001120645	XP_416672	XP_002937799	NP_001038711	XP_003968718
A04321	NP_001029249	NP_001032932	NP_001016869	NP_001092231
A04322	NP_689885		NP_001107358	NP_001004546	XP_003967925
R04324	NP_001171555	XP_416795	XP_002935227	NP_001098993	XP_003970534
A04325	NP_001406	NP_001006260	NP_001011456	NP_997876	XP_003968233
R04331	NP_002201	NP_990770	NP_001116921	NP_001028893	XP_003976960
A04332	NP_060941	NP_001006510	NP_001016105	NP_956182	XP_003963847
A04334	NP_115995	XP_416102	XP_002939992
A04338			XP_002939995	XP_002661377	XP_003972697
[truncated: 13,465 more rows]

## Sheet: 11B
Supplementary Table 11B. Sarcopterygian specific genes
GeneID	RefSeq accession	Gene symbol	Description
A00232	XP_002732736	LOC100370600	NmrA-like family domain containing 1-like
R00358	NP_002885	RBBP8	retinoblastoma binding protein 8
R00553	NP_057615	KLF3	Kruppel-like factor 3 (basic)
R00563	XP_003222921	LOC100563415	cdc42 effector protein 2-like
A00630	XP_003212806	IL-18	interleukin-18
R01267	NP_001085123	rnf168	ring finger protein 168, E3 ubiquitin protein ligase
A01487	XP_001376522	LOC100025661	transcription factor-like 5 protein-like
A01539	XP_003225910	LOC100560873	neuronal pentraxin-1-like
R01654	XP_002199844	LOC100228077	similar to WSC domain containing 1
A01674	NP_001164024	VSIG1	V-set and immunoglobulin domain containing 1
R01949	NP_037393	PPARGC1A	peroxisome proliferator-activated receptor gamma, coactivator 1 alpha
R02069	XP_002940032	LOC100487799	uncharacterized LOC100487799
A02093	XP_003641396	MAPKBP1	mitogen activated protein kinase binding protein 1
R02110	XP_001507253	LOC100073465	uncharacterized protein KIAA0355-like
R02140	NP_001137260	PPHLN1	periphilin 1
A02239	NP_932343	C1orf52	chromosome 1 open reading frame 52
A02255	NP_003077	SNAPC4	small nuclear RNA activating complex, polypeptide 4, 190kDa
A02334	XP_003769432	LOC100929843	podocan-like
A02345	NP_988863	kcnrg	potassium channel regulator
A02359	XP_002192103	LOC100227319	similar to novel collagen protein
A02406	NP_976328	E2F7	E2F transcription factor 7
R02558	NP_002510	NPAT	nuclear protein, ataxia-telangiectasia locus
A02641	XP_001498601	SLC41A2	solute carrier family 41, member 2
R02762	NP_036245	CA14	carbonic anhydrase XIV
R02769	NP_612140	CSTL1	cystatin-like 1
R02890	NP_689600	KCTD18	potassium channel tetramerisation domain containing 18
A02905	XP_416149	FGD6	FYVE, RhoGEF and PH domain containing 6
A03078	XP_003410366	LOC100655073	ubiquitin carboxyl-terminal hydrolase 16-like
R03257	XP_002934146	LOC100487196	pancreatic progenitor cell differentiation and proliferation factor-like protein-like
R03399	XP_001232422	PFN4	profilin family, member 4
A03400	XP_419988	LOC421978	UPF0638 protein B-like
A03420	XP_419594	C3H6orf70	chromosome 3 open reading frame, human C6orf70
R03476	XP_002914632	LOC100484589	uncharacterized LOC100484589
A03753	XP_003931013	A4GNT	alpha-1,4-N-acetylglucosaminyltransferase
A04334	XP_003221217	LOC100552197	calcyphosin-2-like
R04456	NP_001182555	MLLT10	myeloid/lymphoid or mixed-lineage leukemia (trithorax homolog, Drosophila); translocated to, 10
A04561	XP_003760237	LOC100926275	N-acetyllactosaminide beta-1,6-N-acetylglucosaminyl-transferase, isoform B-like
A04675	XP_003763411	TTC3	tetratricopeptide repeat domain 3
A05026	NP_001182209	LRRC72	leucine rich repeat containing 72
A05377	XP_002199427	LOC100231924	similar to UPF0500 protein C1orf216 homolog
R05409	NP_061828	UBB	ubiquitin B
A05539	NP_001254513	UBOX5	U-box domain containing 5
A05579	NP_000064	CD3G	CD3g molecule, gamma (CD3-TCR complex)
R05746	XP_420427	OTUD4	OTU domain containing 4
R05989	NP_060026	FBLIM1	filamin binding LIM protein 1
A06232	XP_001231386	FAM131B	family with sequence similarity 131, member B
A06392	NP_071349	UBE2O	ubiquitin-conjugating enzyme E2O
R06532	NP_001039035	smagp	small cell adhesion glycoprotein homolog
A06678	NP_001107595	ELK1	ELK1, member of ETS oncogene family
A06783	NP_000605	CNTF	ciliary neurotrophic factor
A06996	NP_001186341	SLX4IP	SLX4 interacting protein
A07218	XP_003960676	LOC101060557	von Willebrand factor A domain-containing protein 3A-like
A07265	XP_787867	LOC582836	protein FAM154A-like
A07268	NP_000473	APOA4	apolipoprotein A-IV
R07276	NP_061891	FAM105A	family with sequence similarity 105, member A
A07327	XP_416214	SERHL2	serine hydrolase-like 2
A07378	NP_001077090	ZBTB40	zinc finger and BTB domain containing 40
A07644	XP_425237	RAI1	retinoic acid induced 1
A07780	NP_689824	LRRN4	leucine rich repeat neuronal 4
A07919	XP_003972783	LOC101069085	inter-alpha-trypsin inhibitor heavy chain H2-like
A08089	NP_001185951	CCP110	centriolar coiled coil protein 110kDa
R08096	NP_001082328	LOC398407	pygopus-2beta
A08180	XP_003223900	LOC100563741	NEDD4-binding protein 1-like
A08238	XP_002164941	LOC100209866	similar to zinc finger protein
R08464	NP_003463	DEK	DEK oncogene
A08576	NP_001177	BACH1	BTB and CNC homology 1, basic leucine zipper transcription factor 1
A08723	NP_001090640	igsf9	immunoglobulin superfamily, member 9
A08788	NP_066928	PLSCR1	phospholipid scramblase 1
A08977	NP_006176	NUMA1	nuclear mitotic apparatus protein 1
A09216	XP_003429403	LOC100682067	centromere protein R-like
R09295	NP_055644	DDX46	DEAD (Asp-Glu-Ala-Asp) box polypeptide 46
A09441	NP_001106946	NOXRED1	NADP-dependent oxidoreductase domain containing 1
A09443	NP_998766	TMED8	transmembrane emp24 protein transport domain containing 8
A09499	NP_919289	KIF24	kinesin family member 24
A09802	XP_001511626	PDE7B	phosphodiesterase 7B
R09983	NP_689918	POLR1D	polymerase (RNA) I polypeptide D, 16kDa
A10548	NP_055646	TRANK1	tetratricopeptide repeat and ankyrin repeat containing 1
A10807	XP_003510405	Dnd1	dead end homolog 1 (zebrafish)
A10853	NP_057245	A4GNT	alpha-1,4-N-acetylglucosaminyltransferase
A10893	NP_001087462	MGC86495	MGC86495 protein
R10927	NP_078879	BEND5	BEN domain containing 5
A10969	NP_001182067	GIMD1	GIMAP family P-loop NTPase domain containing 1
A11549	XP_003224076	LOC100566315	major facilitator superfamily domain-containing protein 4-like
A11608	NP_113607	NFKBIZ	nuclear factor of kappa light polypeptide gene enhancer in B-cells inhibitor, zeta
A11950	XP_003212527	SDC3	syndecan 3
R12933	XP_003734621	LOC100409546	serine/arginine-rich splicing factor 10-like
A13351	NP_001186509	SUN2	Sad1 and UNC84 domain containing 2
R13441	XP_002941933	LOC100489381	zinc finger protein 628-like
R13472	NP_071918	ZFP106	zinc finger protein 106 homolog (mouse)
A13534	XP_001372756	LOC100020138	rab11 family-interacting protein 3-like
R13815	NP_001183980	ZFP91	zinc finger protein 91 homolog (mouse)
R13860	NP_001994	FCN1	ficolin (collagen/fibrinogen domain containing) 1
A13889	XP_002937750	LOC100491502	leucine-rich repeat-containing protein 43-like
R14335	NP_872311	C9orf85	chromosome 9 open reading frame 85
A14422	XP_003261815	BBX	bobby sox homolog (Drosophila)
R14430	XP_002826489	LOC100457885	uncharacterized LOC100457885
R14431	NP_116324	MT4	metallothionein 4
R14464	NP_149124	CNP	2',3'-cyclic nucleotide 3' phosphodiesterase
A14517	NP_056374	SETBP1	SET binding protein 1
A14592	NP_689856	KNDC1	kinase non-catalytic C-lobe domain (KIND) containing 1
A14611	NP_001138923	ARHGEF33	Rho guanine nucleotide exchange factor (GEF) 33
A14740	NP_056381	FAM169A	family with sequence similarity 169, member A
A14863	XP_003641980	LOC100857155	adenine phosphoribosyltransferase-like
A14904	NP_115695	PRADC1	protease-associated domain containing 1
A15068	XP_001510867	LOC100079955	uncharacterized protein C20orf85-like
R15183	NP_001135540	epn2	epsin 2
R15238	XP_417765	ZC3H12A	zinc finger CCCH-type containing 12A
A15380	NP_001107018	LIMA1	LIM domain and actin binding 1
R15584	NP_037425	TRA2A	transformer 2 alpha homolog (Drosophila)
A15587	NP_954587	FAM221A	family with sequence similarity 221, member A
A15885	XP_003641993	LOC100859040	interleukin-17C-like
A16010	NP_055927	MAST2	microtubule associated serine/threonine kinase 2
R16122	NP_001133765	mlkl	Mixed lineage kinase domain-like protein
A16219	NP_689916	SAMD9L	sterile alpha motif domain containing 9-like
A16556	NP_990480	IFNG	interferon, gamma
A16709	XP_003203389	LOC100546893	TSC22 domain family protein 1-like
R17122	NP_003622	PARG	poly (ADP-ribose) glycohydrolase
A17221	XP_003202232	LOC100539277	stimulated by retinoic acid gene 8 protein-like
A17256	NP_940682	NEDD4	neural precursor cell expressed, developmentally down-regulated 4, E3 ubiquitin protein ligase
A17533	XP_003478941	LOC100723876	GA-binding protein subunit beta-2-like
A17590	NP_055618	ZNF518A	zinc finger protein 518A
R17832	XP_419534	CNST	consortin, connexin sorting protein
R17927	NP_598368	POFUT2	protein O-fucosyltransferase 2
A18199	XP_003972148	LOC101069685	serine/threonine-protein kinase N2-like
A18225	XP_002933108	LOC100486832	fibroleukin-like
A18275	XP_002932319	LOC100498345	t-cell receptor-associated transmembrane adapter 1-like
A18300	XP_001514818	LOC100084326	zona pellucida sperm-binding protein 2-like
R18320	NP_060842	LRIF1	ligand dependent nuclear receptor interacting factor 1
A18414	XP_002818372	SRPK2	SRSF protein kinase 2
R18448	NP_127492	GTF2I	general transcription factor IIi
R18574	XP_003210714	ARHGAP17	Rho GTPase activating protein 17
A18609	XP_002932670	LOC100489038	CD40 ligand-like
A18839	XP_003220073	LOC100554163	complement component C1q receptor-like
A19199	XP_002196506	LOC100222395	similar to class II bHLH protein ASCL4
A19373	XP_002938325	LOC100494664	sphingosine kinase 2-like
A20202	XP_003763774	A4GNT	alpha-1,4-N-acetylglucosaminyltransferase
R20204	XP_003218461	LOC100555916	alpha-1,4-N-acetylglucosaminyltransferase-like
R20358	NP_002476	NBN	nibrin
R20605	NP_597722	KIAA1958	KIAA1958
A20649	XP_423001	LOC425218	deleted in malignant brain tumors 1 protein-like
A20807	XP_415646	TOM1L1	target of myb1 (chicken)-like 1
R20976	NP_542170	ZSWIM1	zinc finger, SWIM-type containing 1
A20977	NP_542790	ZSWIM3	zinc finger, SWIM-type containing 3
A21023	XP_003202796	LOC100539126	cell surface glycoprotein CD200 receptor 1-A-like
R21168	NP_990190	IFNAR1	interferon (alpha, beta and omega) receptor 1
A21217	NP_062551	SERTAD4	SERTA domain containing 4
A21400	NP_071576	A4galt	alpha 1,4-galactosyltransferase
A21444	XP_002931510	LOC100491026	uncharacterized protein C1orf177-like
A21515	XP_003503258	LOC100765431	leucine-rich repeat-containing protein 19-like
A21637	XP_422399	LRRC19	leucine rich repeat containing 19
A21801	NP_003889	SYNJ2	synaptojanin 2
A21821	NP_002883	ARID4A	AT rich interactive domain 4A (RBP1-like)
A22188	XP_421144	MGA	MAX gene associated
A22365	XP_003391034	LOC100635245	zinc finger BED domain-containing protein 1-like
A22912	XP_003220379	LOC100567523	gastricsin-like
R23039	XP_003217195	akap8l	A kinase (PRKA) anchor protein 8-like
R23274	XP_003217733	nisch	nischarin
A23304	XP_002934640	LOC100490254	leucine-rich repeat and death domain-containing protein LOC401387 homolog
A23358	XP_002930408	LOC100468792	NACHT, LRR and PYD domains-containing protein 3-like
A23458	NP_689534	ERP27	endoplasmic reticulum protein 27
A23484	NP_001009123	A4GALT	alpha 1,4-galactosyltransferase
A23575	XP_003765058	MASP2	mannan-binding lectin serine peptidase 2
R23594	XP_424919	TMEM215	transmembrane protein 215
A23634	NP_542416	PTPN13	protein tyrosine phosphatase, non-receptor type 13 (APO-1/CD95 (Fas)-associated phosphatase)
A23747	XP_001374007	ZFR	zinc finger RNA binding protein
R23752	NP_001254489	TJP3	tight junction protein 3
A24042	XP_003339714	GZF1	GDNF-inducible zinc finger protein 1
A24249	NP_079123	TMC7	transmembrane channel-like 7
A24572	XP_002197156	LOC100221392	uncharacterized LOC100221392
A24905	NP_001928	DPT	dermatopontin
R24919	NP_001026091	BAK1	BCL2-antagonist/killer 1
R25160	XP_001375133	LOC100023648	uncharacterized LOC100023648
R25168	NP_064703	CCNL1	cyclin L1
A25419	XP_002722465	LOC100354741	receptor accessory protein 4
A25548	XP_003202773	LOC100548324	uncharacterized LOC100548324
R25631	XP_002942124	LOC100498077	ankyrin repeat domain-containing protein 42-like
A25713	XP_003965527	LOC101061943	WW domain-binding protein 1-like
A26332	XP_003498374	LOC100755161	N-chimaerin-like
A26392	XP_003508081	LOC100770462	lactosylceramide 4-alpha-galactosyltransferase-like
R26560	XP_002937913	LOC100493338	uncharacterized LOC100493338
A26580	XP_003765584	LOC100933727	retinoic acid-induced protein 2-like
A26608	XP_003437732	LOC100695353	synaptotagmin-4-like
R26647	NP_001138825	ELF1	E74-like factor 1 (ets domain transcription factor)
A26796	NP_076964	C20orf195	chromosome 20 open reading frame 195
A26836	XP_003203390	LOC100547049	nuclear fragile X mental retardation-interacting protein 1-like
A27113	NP_938023	TMEM173	transmembrane protein 173
A27178	XP_003229008	LOC100558577	uncharacterized LOC100558577
A27358	NP_031377	MMRN1	multimerin 1
R27523	XP_001231773	LYPD2	LY6/PLAUR domain containing 2
A27572	NP_036260	CLCA4	chloride channel accessory 4
R27581	XP_003641833	LOC100859827	TSC22 domain family protein 2-like
R27691	NP_751951	KCNE2	potassium voltage-gated channel, Isk-related family, member 2
A28074	XP_003219192	LOC100556380	neuromodulin-like
A28533	XP_003208527	LOC100546562	uncharacterized LOC100546562
A28595	XP_002192002	LOC100226962	similar to rCG47791
R28603	NP_001005242	PKP2	plakophilin 2
A28903	NP_001088733	thap7	THAP domain containing 7
A28910	XP_002942226	c2orf50	chromosome 2 open reading frame 50
R28982	NP_003852	DCAF5	DDB1 and CUL4 associated factor 5
R29265	NP_001026091	BAK1	BCL2-antagonist/killer 1
A29577	XP_003640480	LOC419047	MANSC domain-containing protein 4-like
A29602	NP_851322	SLCO4C1	solute carrier organic anion transporter family, member 4C1
A30072	NP_003939	CDKL2	cyclin-dependent kinase-like 2 (CDC2-related kinase)
A30115	NP_001006699	il17b	interleukin 17B
R30801	NP_006360	LRRC41	leucine rich repeat containing 41
R31248	NP_777567	PPP4R2	protein phosphatase 4, regulatory subunit 2
A31494	NP_006808	ERP29	endoplasmic reticulum protein 29
A31503	NP_001091187	ctsh	cathepsin H
R31679	NP_113640	FAM103A1	family with sequence similarity 103, member A1
R32137	XP_003210493	LOC100542030	myotilin-like
R32186	NP_055871	RRP1B	ribosomal RNA processing 1 homolog B (S. cerevisiae)
A32618	NP_001153047	SCNN1A	sodium channel, non-voltage-gated 1 alpha subunit
R32630	XP_417574	VWA1	von Willebrand factor A domain containing 1
R32717	NP_001106207	FAM208A	family with sequence similarity 208, member A
R32765	NP_002990	SDC4	syndecan 4
A32774	NP_006471	RGS14	regulator of G-protein signaling 14
R32800	NP_963906	IKBIP	IKBKB interacting protein
A33299	XP_002195279	LOC100224649	breast cancer 1, early onset
A33456	XP_002942303	LOC100485954	Fc receptor-like protein 3-like
R33487	NP_149047	TRIM55	tripartite motif containing 55
R33609	XP_003215315	LOC100552373	fibrinogen-like protein 1-like
A33737	XP_001508113	LOC100076790	tumor necrosis factor ligand superfamily member 15-like
A34196	NP_001423	EREG	epiregulin
R34344	NP_001243649	CLEC19A	C-type lectin domain family 19, member A
A34801	XP_003772590	A4GALT	alpha 1,4-galactosyltransferase
A35447	XP_002710993	SLC24A3	solute carrier family 24 (sodium/potassium/calcium exchanger), member 3
A35787	XP_001369458	LOC100015371	uncharacterized LOC100015371
A36298	NP_150280	EPSTI1	epithelial stromal interaction 1 (breast)
A36515	XP_003793531	GKN1	gastrokine 1
A37433	NP_001089367	gtse1	G-2 and S-phase expressed 1
R37450	NP_001138787	DSN1	DSN1, MIND kinetochore complex component, homolog (S. cerevisiae)
A37464	XP_001378775	FBLN2	fibulin 2
A37487	NP_065972	NIN	ninein (GSK3B interacting protein)
R37908	XP_002193546	LOC100218468	similar to Small VCP/p97-interacting protein
A38451	XP_414213	ZNF276	zinc finger protein 276
A38580	NP_001038795	pmela	premelanosome protein a
A38649	XP_001377658	LOC100027337	UBX domain-containing protein 10-like
A38810	XP_694642	LOC566281	zinc-binding protein A33-like
R39335	NP_055554	BCLAF1	BCL2-associated transcription factor 1
R39361	NP_937987	E2F6	E2F transcription factor 6
R39422	NP_056667	LMO7	LIM domain 7
R39431	XP_003471147	LOC100734072	phosphatase and actin regulator 4-like
A39449	NP_000402	HLCS	holocarboxylase synthetase (biotin-(proprionyl-CoA-carboxylase (ATP-hydrolysing)) ligase)
A39950	XP_003431377	LOC100075668	transcriptional-regulating factor 1-like
A40388	NP_001182551	TOPORS	topoisomerase I binding, arginine/serine-rich, E3 ubiquitin protein ligase
R40501	NP_001177340	RPH3AL	rabphilin 3A-like (without C2 domains)
A41021	NP_002678	PNN	pinin, desmosome associated protein
A41359	XP_003792031	GPR33	G protein-coupled receptor 33
A41483	XP_001367560	LOC100020032	beta-1,3-galactosyltransferase 2-like

## Sheet: 11C
Supplementary Table 11C. Fish-coelecanth specific genes
GeneID	RefSeq accession	Gene symbol	Description
A00305	NP_001013591	acrc	acidic repeat containing
A00637	NP_001245154	irig	interferon responsive immune gene
A00930	XP_003456652	LOC100695957	uncharacterized LOC100695957
A01193	NP_001070646	klc3	kinesin light chain 3
A01477	NP_001077285	zgc:162509	zgc:162509
A01745	XP_002194772	PKD1L2	polycystic kidney disease 1-like 2
A01776	XP_003919932	TPH1	tryptophan hydroxylase 1
A02025	NP_001092698	cd248a	CD248 molecule, endosialin a
A02124	XP_003449451	LOC100706136	uncharacterized LOC100706136
A02128	XP_003449451	LOC100706136	uncharacterized LOC100706136
A02129	XP_003449451	LOC100706136	uncharacterized LOC100706136
A02163	XP_002937406	rasal2	RAS protein activator like 2
R02745	XP_001920115	LOC572246	UPF0661 TPR repeat-containing protein C16D10.01c-like
A03446	XP_003451270	LOC100707913	sialic acid-binding Ig-like lectin 15-like
R03607	XP_003448322	LOC100691908	uncharacterized methyltransferase ydaC-like
A03633	XP_001372562	SH3TC1	SH3 domain and tetratricopeptide repeats 1
A03808	XP_003222907	LOC100560269	interferon-inducible GTPase 5-like
R03893	NP_001121712	si:ch211-51h9.7	si:ch211-51h9.7
A04716	NP_571145	mdka	midkine-related growth factor
A05742	XP_003640527	LOC100857673	nucleolar pre-ribosomal-associated protein 1-like
A05990	XP_001366092	SPEN	spen homolog, transcriptional regulator (Drosophila)
A06330	XP_690841	LOC562357	high affinity cGMP-specific 3',5'-cyclic phosphodiesterase 9A-like
R06442	XP_003445355	LOC100698576	uncharacterized LOC100698576
A06529	XP_003438053	LOC100694196	inhibin beta C chain-like
A06713	NP_057607	KLRF1	killer cell lectin-like receptor subfamily F, member 1
A06984	XP_003447149	LOC100712016	dual specificity tyrosine-phosphorylation-regulated kinase 4-like
A07112	XP_003445852	LOC100699119	uncharacterized LOC100699119
A07314	NP_001004007	matn3a	matrilin 3a
A07348	XP_002937348	LOC100496122	embryonic protein UVS.2-like
A07445	NP_001104670	shrprbck1r	sharpin and rbck1 related
A08161	NP_001135330	m4a15	Membrane-spanning 4-domains subfamily A member 15
A08423	XP_003970314	LOC101069153	beta-crystallin B1-like
A08933	NP_002039	GAS1	growth arrest-specific 1
A10384	XP_003971640	LOC101080069	B1 bradykinin receptor-like
R10439	NP_597719	TTC14	tetratricopeptide repeat domain 14
R10482	NP_001180398	selj	selenoprotein J
A10589	XP_002938080	LOC100497066	uncharacterized LOC100497066
A11120	XP_003217530	LOC100552449	ribosomal RNA processing protein 36 homolog
A11301	XP_001336650	LOC100000253	uncharacterized LOC100000253
A11314	NP_000928	POLR2A	polymerase (RNA) II (DNA directed) polypeptide A, 220kDa
A12589	NP_742104	KCNQ2	potassium voltage-gated channel, KQT-like subfamily, member 2
R12735	NP_001070088	zgc:152830	zgc:152830
A12851	XP_003208478	LOC100551266	neuronal migration protein doublecortin-like
A12877	XP_002412037	IscW_ISCW011105	FAD NAD binding oxidoreductase, putative
A14096	XP_682904	LOC555408	mannose receptor C type 1-like
A14097	NP_001025393	si:ch211-282j17.3	si:ch211-282j17.3
A14099	NP_001025393	si:ch211-282j17.3	si:ch211-282j17.3
A14100	XP_001332621	LOC793375	macrophage mannose receptor 1-like protein 1-like
A14591	NP_571773	vox	ventral homeobox
A14907	NP_571130	flh	floating head
A14946	NP_001159601	pcsk1nl	proprotein convertase subtilisin/kexin type 1 inhibitor, like
R15109	XP_003437938	dsp	desmoplakin
A15147	NP_958437	BLOC1S5	biogenesis of lysosomal organelles complex-1, subunit 5, muted
A15642	XP_003973260	LOC101071231	uncharacterized LOC101071231
A15670	XP_001364775	CDH10	cadherin 10, type 2 (T2-cadherin)
A16693	XP_422383	ELTD1	EGF, latrophilin and seven transmembrane domain containing 1
A16762	NP_000112	EPOR	erythropoietin receptor
A16875	XP_001334183	LOC794404	macrophage mannose receptor 1-like protein 1-like
A16906	XP_002938080	LOC100497066	uncharacterized LOC100497066
A17013	XP_001341998	LOC100002143	macrophage mannose receptor 1-like protein 1-like
A18804	XP_003229504	LOC100567106	ufm1-specific protease 1-like
A18902	XP_002732735	LOC100370453	uncharacterized LOC100370453
A19081	XP_003438549	LOC100712247	uncharacterized LOC100712247
A19397	XP_002943511	LOC100491753	uncharacterized LOC100491753
A20590	XP_001377231	LOC100026711	protein FAM131C-like
A20829	XP_001234668	TMEM132E	transmembrane protein 132E
A20863	XP_003963905	LOC101072538	ABC transporter G family member 23-like
A21286	NP_599032	SMTN	smoothelin
A21717	NP_003610	PRSS12	protease, serine, 12 (neurotrypsin, motopsin)
A21858	XP_003454709	LOC100699775	atrial natriuretic peptide receptor 1-like
A21942	XP_003765649	MXRA5	matrix-remodelling associated 5
A22658	XP_002940951	LOC100496182	extracellular calcium-sensing receptor-like
A23498	XP_003966930	LOC101078918	phospholipid scramblase 2-like
A25236	NP_001096210	slc26a9	solute carrier family 26, member 9
A25593	NP_003585	TTF2	transcription termination factor, RNA polymerase II
A25824	XP_003898050	TIAM2	T-cell lymphoma invasion and metastasis 2
A25905	NP_001135441	DAXX	death-domain associated protein
A26661	NP_056327	DNAH1	dynein, axonemal, heavy chain 1
R26744	NP_001154848	C6orf136	chromosome 6 open reading frame 136
R26930	XP_001789846	LOC100141212	zinc finger protein 736-like
A27087	NP_001093539	LOC100000851	novel protein containing lectin C-type domains
A27088	NP_001093472	LOC561255	novel protein containing lectin C-type domains
R27186	NP_001134972	leca	Lectin
A28073	NP_001093472	LOC561255	novel protein containing lectin C-type domains
R28131	XP_694069	LOC565707	uncharacterized LOC565707
A29236	NP_001177693	TMEM238	transmembrane protein 238
A29245	XP_001341998	LOC100002143	macrophage mannose receptor 1-like protein 1-like
A29797	XP_694642	LOC566281	zinc-binding protein A33-like
A29866	XP_003439548	LOC100712342	histone H3-like centromeric protein A-like
R29959	NP_001134972	leca	Lectin
A30155	NP_002528	OAZ2	ornithine decarboxylase antizyme 2
R30400	XP_003921732	LOC101034052	cortexin-2-like
A30605	XP_002662740	LOC100333968	macrophage mannose receptor 1-like
A30606	XP_001337068	LOC796696	secretory phospholipase A2 receptor-like
A31947	NP_115598	FAM188B	family with sequence similarity 188, member B
A32096	XP_003225378	LOC100566764	serine/threonine-protein kinase 33-like
A32371	XP_785807	LOC580670	uncharacterized LOC580670
A32410	NP_055303	RAB30	RAB30, member RAS oncogene family
A32930	XP_003222907	LOC100560269	interferon-inducible GTPase 5-like
A32936	XP_003222907	LOC100560269	interferon-inducible GTPase 5-like
A33002	XP_003972056	LOC101066370	von Willebrand factor A domain-containing protein 7-like
R33405	XP_002815930	LOC100458653	U4/U6.U5 small nuclear ribonucleoprotein 27 kDa protein-like
R33492	XP_003969007	LOC101063660	counting factor associated protein D-like
A33596	NP_001184183	and1 (and_a)	actinodin1
A33853	XP_003415090	LOC100658027	uncharacterized protein C1orf96-like
A33878	XP_001376617	LOC100025798	butyrophilin subfamily 1 member A1-like
A35553	NP_001134826	r1441	Probable E3 ubiquitin-protein ligase RNF144A-A
R36139	XP_003973699	LOC101064269	uncharacterized LOC101064269
A36192	XP_003197961	LOC100535913	CMRF35-like molecule 5-like
A36227	XP_003199920	LOC100537819	trypsin inhibitor ClTI-1-like
A36905	XP_003339978	CUZD1	CUB and zona pellucida-like domains 1
A37484	XP_003362131	LOC100621636	monoacylglycerol lipase ABHD12-like
A37565	NP_001086225	MGC84185	MGC84185 protein
A37879	XP_003442170	LOC100693235	neurexophilin-1-like
A39070	XP_001497099	TMCO7	transmembrane and coiled-coil domains 7
A39109	XP_001332702	LOC793514	macrophage mannose receptor 1-like
R39283	NP_001239287	t53i2	Tumor protein p53-inducible nuclear protein 2
A39576	NP_001191387	TNFRSF19	tumor necrosis factor receptor superfamily, member 19
A40091	NP_001084027	msi2	musashi homolog 2
A40284	XP_002666820	LOC571837	similar to 130 kDa myosin-binding subunit of smooth muscle myosin phophatase (M130)
A40335	XP_003206773	LOC100547786	WD repeat-containing protein 25-like
A40604	NP_954584	FAM173B	family with sequence similarity 173, member B
A40642	NP_001017540	ak5l	adenylate kinase 5, like
A40654	NP_003575	DUSP11	dual specificity phosphatase 11 (RNA/RNP complex 1-interacting)
A40852	XP_003450309	LOC100693091	fucolectin-7-like
A40982	XP_003445296	LOC100705588 (and_b)	uncharacterized LOC100705588
A41023	NP_001130019	LOC100192335	Prop-1-like homeobox protein
A41413	XP_003342293	LOC100617715	uncharacterized LOC100617715
A41478	XP_002941875	iqub	IQ motif and ubiquitin domain containing
A41524	XP_003450311	LOC100693627	fucolectin-1-like
A41610	NP_060166	MCM9	minichromosome maintenance complex component 9
A41686	XP_692132	LOC563681	uncharacterized LOC563681
