# Supplementary material for: Coelacanth genomes reveal signatures for evolutionary transition from water to land
Source: HighWire-hosted journal article supplement (doi:10.1101/gr.158105.113), 2013-07-20
Supplement: Supplemental_Table_13.xlsx [file Supplemental_Table_13.xlsx]

## Sheet: 13
Supplementary Table 13. Conserved regions between coelacanth and vertebrates
	All				Exon				Intron				Intergenic
	# of regions	Total size (Mbp)	Identity (%)		# of regions	Total size (Mbp)	Identity (%)		# of regions	Total size (Mbp)	Identity (%)		# of regions	Total size (Mbp)	Identity (%)
Human	144808	25.9	76.5		105898	18.1	75.3		12762	2.6	79		26148	5.3	79.2
Chicken	137480	26.2	77.6		98906	17.8	76.2		12735	2.7	80.4		25839	5.8	80.4
Frog	128910	22.7	75		99742	17.3	74.2		9681	1.8	77.5		19487	3.6	77.9
Zebrafish	113047	17.8	73.9		91816	14.8	73.5		7146	1	75.6		14085	2	76.1
Fugu	95573	14.7	74		81827	12.8	73.6		4841	0.7	76.6		8905	1.3	76.8
Sarcopterygian	14415	2			7871	1			2142	0.3			4402	0.7
Vertebrate	68373	7.6			58209	7.2			3742	0.2			6422	0.2
