# Supplementary material for: Coelacanth genomes reveal signatures for evolutionary transition from water to land
Source: HighWire-hosted journal article supplement (doi:10.1101/gr.158105.113), 2013-07-20
Supplement: Supplemental_Table_14.xlsx [file Supplemental_Table_14.xlsx]

## Sheet: 14
Supplementary Table 14. 5,247 gene used for the phylogenetic analysis
coelacanth	human	chicken	frog	zebrafish
A00004	NP_079526	XP_414776	NP_001120249	XP_684174
A00073	NP_079047	XP_003643576	NP_001120405	NP_001017632
A00099	NP_001154970	XP_421181	XP_002935388	XP_003200432
A00113	NP_004736	XP_003641091	XP_002935195	XP_685805
A00126	NP_001349	NP_001026330	NP_001135571	NP_001108613
A00135	NP_060130	NP_001012570	NP_001016842	NP_998081
A00136	NP_056144	XP_425908	NP_001015927	XP_001334031
A00140	NP_001026913	XP_419848	XP_002938343	NP_991180
A00161	NP_003384	XP_426508	XP_002936394	NP_571034
A00179	NP_001041	NP_001025516	XP_002935929	XP_002665648
A00185	NP_036253	XP_001233620	NP_001037889	XP_003199689
A00186	NP_001138424	NP_989869	XP_002937635	XP_693332
A00211	NP_003110	NP_001012545	XP_002933705	XP_001923118
A00230	NP_002843	NP_001017413	XP_002933289	XP_694358
A00237	NP_057386	XP_414437	NP_001008192	NP_001003996
A00244	NP_056121	XP_422499	XP_002931653	XP_002665714
A00266	NP_597707	XP_001231827	XP_002932472	NP_001108037
A00279	NP_115942	NP_001008464	XP_002940479	XP_001920897
A00303	NP_002188	NP_001025707	NP_001135643	NP_001030155
A00352	NP_067002	XP_416589	XP_002935828	NP_001122012
A00367	NP_000262	XP_419162	XP_002934172	NP_001230804
A00381	NP_005029	XP_426283	NP_988984	NP_001002065
A00407	NP_002555	XP_425667	NP_989039	XP_700330
A00410	NP_003480	XP_425538	NP_001090752	XP_001336737
A00439	NP_006409	NP_001035553	NP_001017043	XP_697855
A00464	NP_005031	XP_425654	NP_001072639	NP_001002694
A00479	NP_060749	XP_416098	NP_001016079	NP_001002098
A00482	NP_775489	NP_001001301	XP_002940217	NP_999960
A00565	NP_060615	XP_420936	NP_001123398	NP_001076519
A00574	NP_055545	XP_415264	XP_002932126	NP_001107090
A00669	NP_003091	NP_001012625	XP_002931761	NP_001032787
A00696	NP_065716	XP_416821	XP_002938294	NP_001132930
A00711	NP_004422	XP_001234814	NP_001006765	NP_571490
A00734	NP_116279	XP_419396	XP_002940743	NP_997965
A00753	NP_009151	XP_414195	NP_001039155	NP_001104671
A00759	NP_003892	NP_001007947	XP_002943540	NP_001082938
A00813	NP_061036	NP_001026670	XP_002932168	NP_001017716
A00823	NP_000563	NP_001004414	NP_001165400	NP_001018621
A00832	NP_835230	NP_001008679	XP_002933662	XP_694859
A00876	NP_443714	NP_001103409	NP_001016575	NP_001017622
A00877	NP_002759	NP_001020611	NP_001135608	NP_956857
A00880	NP_056232	XP_423842	XP_002936340	NP_956821
A00887	NP_057657	XP_423689	NP_001004948	XP_694162
A00903	NP_000124	NP_989674	NP_001011223	NP_001035400
A00906	NP_443091	NP_001136344	NP_001072828	XP_688354
A00910	NP_056146	NP_001004413	NP_001123711	NP_001009556
A01012	NP_065904	NP_001012830	XP_002932210	NP_996936
A01039	NP_001139575	XP_422116	NP_001120163	XP_001340167
A01040	NP_001028202	XP_422117	NP_001011186	NP_001002583
A01041	NP_077817	XP_426601	NP_001039087	NP_001108048
A01092	NP_056044	XP_415920	NP_001072577	NP_001071028
A01135	NP_001157281	XP_415806	XP_002937192	XP_002664681
A01162	NP_055132	XP_418592	NP_001072229	NP_001017656
A01164	NP_061916	NP_001006357	NP_001096403	NP_956928
A01213	NP_110442	XP_001235076	NP_001015688	NP_001017757
A01218	NP_001177747	NP_001026457	NP_001039194	NP_956227
A01250	NP_003925	NP_001006199	NP_001090834	NP_001007777
A01251	NP_067632	XP_415465	NP_001072898	NP_001007458
A01258	NP_444509	XP_001233100	XP_002933631	NP_001020721
A01265	NP_001035055	NP_001155877	NP_001107725	NP_001122195
A01293	NP_775841	NP_001012837	XP_002939692	NP_001003757
A01303	NP_064554	XP_001233654	XP_002933286	NP_001008596
A01314	NP_056273	NP_001026272	NP_001072833	NP_001038535
A01328	NP_003647	XP_414388	NP_001016269	XP_001333925
A01337	NP_036377	XP_421294	NP_001017145	NP_001002864
A01364	NP_001243503	XP_424790	XP_002934870	XP_687500
A01403	NP_001863	XP_417046	NP_001025617	NP_001018539
A01404	NP_002289	NP_001008440	NP_001015721	NP_571395
A01413	NP_055489	NP_001006143	NP_989397	NP_957483
A01422	NP_065924	NP_001091008	XP_002938357	NP_001124166
A01467	NP_001257513	XP_421878	XP_002932048	NP_001073437
A01468	NP_997721	XP_421879	XP_002932066	XP_001332328
A01470	NP_001032208	XP_421880	XP_002932044	XP_001921526
A01497	NP_001864	XP_420392	NP_001106417	NP_999975
A01499	NP_006736	NP_001006438	NP_001072809	NP_998518
A01501	NP_001093859	XP_420389	NP_001016373	NP_001095863
A01508	NP_076939	XP_417379	NP_001072239	XP_687373
A01563	NP_061956	XP_422313	NP_001182604	NP_001014331
A01569	NP_001171419	XP_416330	NP_001072226	NP_001035440
A01571	NP_077288	XP_416329	NP_001090704	NP_001038233
A01591	NP_620142	XP_421092	NP_001184083	XP_706374
A01592	NP_000527	XP_421091	XP_002937337	NP_571460
A01593	NP_000439	NP_001026359	XP_002937338	NP_571464
A01605	NP_001012738	NP_001026387	NP_001016013	NP_001017877
A01611	NP_000308	XP_417928	XP_002937697	NP_001092237
A01619	NP_116062	XP_003643507	NP_001016417	NP_001007159
A01629	NP_060988	XP_427082	NP_001016909	NP_001019984
A01669	NP_001010888	XP_003641177	XP_002931879	XP_001342172
A01670	NP_061154	XP_420173	NP_001016675	NP_955936
A01675	NP_002805	XP_420323	NP_001016356	NP_991317
A01680	NP_006553	NP_001171614	NP_001072559	NP_001020703
A01718	NP_006110	NP_001012785	NP_001008163	NP_571356
A01719	NP_071322	XP_001233793	XP_002936816	NP_571596
A01720	NP_056263	XP_421721	NP_001096275	NP_001038842
A01726	NP_004221	XP_003643593	XP_002934399	NP_001153442
A01742	NP_055472	XP_001234099	NP_001096197	XP_698602
A01746	NP_001008723	XP_421748	NP_001119542	NP_001071024
A01747	NP_203755	XP_426536	XP_002942965	NP_001017872
A01749	NP_079421	XP_421745	XP_002938114	XP_697139
A01750	NP_001002759	XP_001234168	XP_002936844	NP_001076329
A01799	NP_085143	XP_428887	NP_001090711	NP_998405
A01826	NP_004385	NP_001026174	NP_001017164	NP_571647
A01881	NP_061991	XP_417801	XP_002939338	NP_001230080
A01892	NP_071449	XP_414904	NP_001120412	NP_001165868
A01939	NP_000152	NP_990554	NP_001006789	NP_001129727
A01941	NP_065815	XP_414857	XP_002932514	XP_692129
A01964	NP_000323	XP_003640803	XP_002932738	NP_001038291
A01982	NP_001128350	XP_418511	XP_002941368	XP_001922460
A02000	NP_997046	NP_001186644	NP_001120284	XP_003198268
A02023	NP_001004354	XP_428951	NP_001096349	NP_852472
A02077	NP_852480	XP_003640625	NP_001007919	NP_001002865
A02121	NP_065076	XP_419313	NP_001120298	XP_001920508
A02138	NP_005739	NP_001007851	NP_988897	NP_001038733
A02189	NP_113643	XP_003640381	NP_001017103	NP_001020681
A02223	NP_001726	XP_415405	NP_001190988	XP_001919226
A02226	NP_056466	XP_003642354	NP_001072446	NP_001121998
A02228	NP_005038	NP_001012815	NP_001015983	NP_001017573
A02254	NP_434700	XP_425329	NP_001120274	NP_001103755
A02256	NP_001034797	XP_001235313	NP_001037937	NP_001103754
A02257	NP_055975	NP_001006197	XP_002935264	NP_001007443
A02258	NP_063945	XP_415418	XP_002935265	NP_001096089
A02291	NP_006222	XP_001233985	XP_002934338	NP_001121995
A02326	NP_003867	NP_001026637	NP_001016689	NP_001017400
A02335	NP_612468	XP_419766	NP_001016090	NP_001002356
A02354	NP_258428	XP_001233077	NP_001120567	XP_689191
A02357	NP_115635	NP_001025799	NP_001135538	NP_998228
A02396	NP_001257411	XP_428428	XP_002935612	NP_001159710
A02401	NP_542408	XP_415908	NP_001165079	NP_001025171
A02438	NP_001153003	XP_426464	NP_001106497	NP_001038475
A02446	NP_060179	NP_001007973	XP_002943490	NP_956801
A02491	NP_056190	NP_989837	NP_001007477	NP_991190
A02521	NP_113664	XP_414180	NP_001027499	XP_003199065
A02566	NP_005261	XP_003641632	XP_002943329	NP_571042
A02571	NP_005904	NP_001026186	NP_001096392	NP_775386
A02581	NP_001028750	NP_001026111	XP_002935367	NP_001103937
A02605	NP_060710	XP_423078	XP_002938994	NP_998033
A02622	NP_060182	XP_418244	NP_001006752	NP_001018362
A02642	NP_689531	XP_003640442	XP_002938117	NP_001188341
A02672	NP_612502	XP_419485	NP_001096519	NP_001020655
A02681	NP_001012992	XP_419504	NP_001120355	XP_699375
A02687	NP_003598	NP_001186372	XP_002938889	NP_001038559
A02709	NP_055909	XP_001232817	XP_002931932	NP_878289
A02721	NP_003316	NP_989563	XP_002931950	XP_696478
A02724	NP_003495	XP_415070	XP_002931928	NP_998551
A02753	NP_940686	NP_001186255	NP_001121426	NP_001002224
A02757	NP_113619	XP_417041	XP_002941013	NP_001137512
A02774	NP_443097	XP_415017	NP_001120532	NP_001008640
A02777	NP_005876	XP_419012	XP_002938364	XP_002660875
A02779	NP_963844	XP_425439	XP_002938552	NP_001009559
A02798	NP_694591	XP_421393	NP_001238746	NP_001123984
A02811	NP_891552	NP_001025740	NP_001011439	NP_957183
A02822	NP_001026885	XP_413925	XP_002933003	NP_001038594
A02856	NP_001077422	NP_001103529	XP_002932440	XP_003199748
A02859	NP_003387	XP_001234394	NP_001096553	NP_001131132
A02898	NP_001165980	NP_001186039	XP_002937759	NP_001122004
A02900	NP_001035862	XP_416154	NP_001072389	NP_956551
A02901	NP_006829	NP_001006233	NP_001016115	NP_955934
A02904	NP_060069	XP_416152	NP_001039208	NP_001108047
A02907	NP_001135975	XP_001232150	XP_002938963	NP_001119949
A02987	NP_002381	XP_425842	NP_001243157	XP_695529
A03048	NP_006563	XP_415686	NP_001120411	NP_001012243
A03059	NP_001011551	XP_420333	NP_001004886	NP_955961
A03066	NP_001171671	NP_001073197	XP_002931849	NP_001093478
A03075	NP_056380	XP_416690	NP_001072745	XP_001340400
A03087	NP_078832	NP_001041731	NP_001005046	XP_001339495
A03091	NP_054745	XP_417859	XP_002940683	NP_991151
A03101	NP_078848	XP_419370	NP_001072369	NP_001038460
A03112	NP_009122	NP_001186536	NP_001106386	NP_571304
A03114	NP_002067	NP_001186488	NP_001107314	NP_001025379
A03118	NP_037386	NP_001186487	NP_001135652	NP_001038213
A03130	NP_079544	NP_989870	XP_002935759	XP_001339492
A03140	NP_073598	XP_417936	XP_002932963	XP_001334782
A03145	NP_001217	NP_990057	NP_001011068	NP_001018333
A03218	NP_005636	NP_001006252	NP_001016066	NP_001004665
A03219	NP_002255	NP_001025945	NP_989192	XP_701359
A03221	NP_001017928	XP_416494	NP_001016242	NP_957101
A03233	NP_055157	NP_990139	NP_989114	NP_571457
A03261	NP_000208	XP_425660	XP_002932344	XP_001334455
A03275	NP_078813	XP_416955	XP_002933053	XP_682732
A03329	NP_001036069	XP_422596	XP_002937144	NP_957327
A03330	NP_001175	XP_003641789	XP_002937136	XP_696163
A03352	NP_002294	NP_989654	NP_001037866	NP_001106847
A03394	NP_001229679	XP_003642586	NP_001119978	NP_001182175
A03405	NP_055578	XP_420071	XP_002936026	NP_001003544
A03427	NP_114439	XP_003642258	XP_002931943	XP_688779
A03457	NP_054894	NP_001006388	NP_001120107	NP_001003435
A03495	NP_003256	NP_001011691	XP_002934448	NP_001013287
A03500	NP_660161	NP_989999	XP_002936902	NP_571707
A03504	NP_068572	NP_001186459	XP_002936903	XP_001334518
A03547	NP_005974	NP_001007983	NP_001135611	NP_001076306
A03557	NP_056053	XP_414499	NP_001096212	XP_689275
A03574	NP_620159	XP_423668	NP_001123849	NP_001103955
A03579	NP_714916	XP_003640613	NP_001120575	NP_001092215
A03586	NP_115704	XP_419538	XP_002931529	XP_686288
A03589	NP_060482	XP_003641032	XP_002931555	XP_698032
A03599	NP_005540	NP_989793	XP_002938481	XP_002667319
A03600	NP_004965	NP_989794	XP_002938475	NP_001104640
A03601	NP_002223	NP_001025549	XP_002938474	XP_001922996
A03654	NP_001166245	XP_001231905	XP_002934430	XP_001337404
A03655	NP_001129628	XP_414126	XP_002934420	XP_003199041
A03667	NP_001078816	XP_415507	NP_001090629	NP_001029352
A03671	NP_056169	NP_001025861	NP_001107292	XP_001923018
A03681	NP_055188	XP_422799	NP_989321	NP_001122289
A03687	NP_001165378	XP_001234388	XP_002940483	NP_001017643
A03691	NP_000193	XP_420361	NP_001184061	NP_001073537
A03702	NP_542193	NP_001035209	NP_001017089	NP_001082804
A03707	NP_001009894	XP_416129	NP_001121420	NP_001008606
A03721	NP_653296	XP_419397	NP_001096412	NP_001007428
A03736	NP_258412	XP_422234	XP_002934214	NP_001093456
A03748	NP_085150	XP_416344	NP_001072664	NP_001189348
A03773	NP_689522	NP_989681	XP_002936021	XP_001342084
A03826	NP_005905	XP_424376	NP_001005655	NP_944595
A03843	NP_004301	XP_426342	NP_001120435	XP_002660498
A03864	NP_036422	XP_426581	XP_002934666	NP_001020122
A03923	NP_005709	NP_001244213	NP_001004844	NP_001003762
A03948	NP_473454	XP_418267	NP_001011260	XP_003198013
A03969	NP_115882	NP_001007887	NP_989033	NP_001107913
A04000	NP_113627	XP_001234628	NP_001016326	NP_001074219
A04035	NP_055830	XP_001233692	NP_989064	NP_001076274
A04036	NP_001041666	XP_418269	XP_002940183	XP_003201004
A04046	NP_115871	XP_003642910	XP_002937984	XP_001919781
A04060	NP_002488	NP_001026221	NP_001164656	NP_957344
A04102	NP_037504	NP_990309	NP_001093701	XP_001344700
A04104	NP_055598	NP_001006479	NP_001121463	NP_001180468
A04135	NP_001003794	XP_414365	NP_001106390	NP_956591
A04209	NP_001229243	XP_422689	XP_002936577	XP_696830
A04210	NP_055336	XP_003641592	NP_001011179	NP_991316
A04239	NP_001004439	XP_413930	XP_002932992	NP_001166098
A04271	NP_000127	NP_001006587	XP_002935027	NP_001035727
A04284	NP_009048	NP_001025554	NP_001106463	NP_001012365
A04316	NP_004318	XP_415244	NP_001123792	XP_002665983
A04321	NP_001029249	NP_001032932	NP_001016869	NP_001092231
A04325	NP_001406	NP_001006260	NP_001011456	NP_997876
A04332	NP_060941	NP_001006510	NP_001016105	NP_956182
A04430	NP_510870	NP_001107598	XP_002937233	NP_957500
A04434	NP_001299	XP_001231869	NP_001017266	NP_997935
A04446	NP_075044	NP_001026202	NP_001072657	NP_001035481
A04479	NP_001185922	NP_001026041	NP_001004896	NP_001017580
A04502	NP_001073678	XP_003640850	XP_002938101	XP_001342745
A04505	NP_055719	XP_421784	NP_001106414	XP_002664194
A04509	NP_068589	XP_423654	XP_002941550	NP_001076285
A04532	NP_056147	XP_001233318	NP_001015778	NP_998356
A04556	NP_000495	NP_990353	NP_001015728	NP_958870
A04605	NP_001257365	XP_426134	NP_001039192	NP_001004568
A04635	NP_036423	XP_423289	XP_002936678	XP_001337869
A04649	NP_036218	NP_001006515	XP_002941839	NP_001243171
A04670	NP_055654	XP_422319	XP_002933836	XP_001921948
A04693	NP_065834	XP_420894	NP_001164985	NP_956242
A04717	NP_000732	NP_001026362	NP_001106514	XP_001922442
A04718	NP_003842	XP_003640512	XP_002936276	NP_001074159
A04721	NP_000020	XP_419584	XP_002931552	NP_932329
A04736	NP_000967	XP_415539	NP_001007860	NP_963878
A04775	NP_002992	XP_003643864	NP_001136371	NP_001003523
A04780	NP_002232	XP_003643542	NP_001072312	XP_003198936
A04793	NP_149132	XP_003641399	XP_002936940	XP_689128
A04802	NP_001025056	XP_417578	NP_001008043	NP_001003497
A04811	NP_002846	XP_003642639	XP_002935055	NP_001161041
A04818	NP_001243000	XP_420083	XP_002941196	XP_003198228
A04821	NP_954981	XP_415702	XP_002937633	NP_001070224
A04829	NP_001002860	XP_421333	XP_002933257	NP_001020722
A04832	NP_061155	XP_418836	XP_002939460	NP_001096146
A04833	NP_001186635	XP_003640774	NP_001107545	XP_696417
A04851	NP_005779	NP_001186400	NP_988966	NP_001017655
A04868	NP_004664	XP_001233150	NP_001123408	NP_001014820
A04923	NP_777594	XP_417913	NP_001011311	NP_001071038
A04924	NP_004579	XP_417914	NP_001116903	NP_001071097
A04959	NP_775762	XP_414562	XP_002939655	XP_003199983
A04993	NP_006151	XP_003643468	NP_001072486	NP_571157
A04998	NP_001158504	XP_001234514	NP_001096172	NP_001038816
A05016	NP_058642	NP_001076835	NP_001008022	NP_001004667
A05021	NP_079131	NP_001008446	XP_002932900	NP_998653
A05046	NP_001036155	XP_420821	XP_002939268	XP_001338937
A05065	NP_075066	XP_422612	NP_001011374	NP_001025431
A05089	NP_000784	NP_989445	NP_001184161	NP_997954
A05090	NP_689659	XP_426454	XP_002938911	NP_001083005
A05159	NP_005108	NP_990005	NP_001136297	NP_001012246
A05206	NP_005021	NP_001025810	NP_998844	NP_001003890
A05222	NP_055875	XP_418848	NP_001072670	NP_001039030
A05223	NP_056298	XP_418847	XP_002937037	NP_001070628
A05309	NP_061969	XP_419499	NP_001072714	NP_001038661
A05342	NP_065890	NP_001026135	NP_001072858	NP_999874
A05363	NP_055223	NP_001008451	NP_001015966	NP_001003601
A05371	NP_055281	XP_417774	NP_001007884	NP_001017432
A05372	NP_079128	NP_001026071	XP_002936270	XP_696015
A05373	NP_036331	XP_425781	XP_002936260	XP_699384
A05395	NP_001499	NP_001073574	XP_002944321	NP_956711
A05396	NP_115727	NP_001180514	NP_001027509	NP_956601
A05414	NP_071731	NP_001012629	NP_001006820	NP_001108536
A05423	NP_001129396	XP_418688	XP_002939057	XP_001345360
A05425	NP_443197	XP_003641712	NP_001096305	NP_001093560
A05431	NP_003498	NP_989552	NP_001016741	NP_571214
A05436	NP_056162	NP_989586	NP_001072885	XP_691626
A05449	NP_058633	XP_416792	XP_002933658	XP_001922054
A05455	NP_054886	XP_416121	NP_001107396	NP_001038519
A05456	NP_115606	XP_416122	XP_002931678	NP_001038522
A05459	NP_055990	XP_423664	XP_002942585	XP_003200210
A05523	NP_001092010	NP_989498	NP_001120267	NP_001038470
A05524	NP_598375	XP_420565	XP_002939628	XP_691411
A05540	NP_002827	XP_426359	NP_001121422	NP_571963
A05561	NP_001019815	NP_001039303	XP_002933457	XP_002667429
A05612	NP_689654	XP_003640464	XP_002938142	NP_001015043
A05614	NP_078827	NP_001007855	XP_002938141	NP_001020677
A05617	NP_001004441	XP_429178	XP_002934859	NP_001091653
A05635	NP_000321	NP_001128447	NP_001096319	NP_001003438
A05651	NP_005601	NP_990183	NP_001011394	NP_997760
A05652	NP_848642	XP_001233490	NP_001016791	NP_001017687
A05653	NP_001035531	XP_417808	NP_001116924	NP_001035340
A05658	NP_201572	XP_001233674	NP_001005037	NP_001121838
A05691	NP_008975	NP_001038113	NP_001072433	NP_001018440
A05741	NP_478067	XP_003640525	XP_002938494	XP_692814
A05764	NP_002633	XP_422231	NP_001017125	NP_998426
A05782	NP_005059	XP_419817	XP_002932187	NP_835740
A05888	NP_005912	XP_424734	XP_002940279	XP_002663531
A05908	NP_009154	XP_426435	NP_001096334	NP_001122183
A05949	NP_005759	XP_416516	XP_002941254	XP_683208
A05950	NP_006322	XP_416515	XP_002941256	NP_001035427
A05956	NP_976046	XP_426443	NP_001135667	XP_696143
A05963	NP_061815	NP_990864	XP_002940264	NP_001106998
A05969	NP_073582	XP_422453	NP_001008070	NP_001017907
A05995	NP_065068	XP_424509	NP_001027481	NP_705960
A05998	NP_778250	XP_419923	NP_001016270	XP_692960
A06013	NP_000746	XP_415478	NP_001027489	NP_001005587
A06112	NP_659436	NP_001073224	NP_001184030	XP_002663924
A06117	NP_004095	NP_990486	XP_002937357	XP_001923643
A06128	NP_068745	NP_989493	XP_002937332	XP_001340966
A06130	NP_001120654	XP_421675	XP_002937241	NP_001018598
A06136	NP_000665	NP_989647	NP_001106540	NP_001122056
A06140	NP_060367	XP_418755	NP_001072543	XP_693069
A06162	NP_859056	XP_001231596	NP_001096231	NP_001092229
A06186	NP_835368	NP_001004766	NP_001001232	NP_001003855
A06291	NP_057021	XP_417358	NP_001017115	XP_684608
A06312	NP_116119	XP_419808	NP_001016074	NP_956646
A06326	NP_001018864	XP_422091	NP_001072656	NP_001008622
A06329	NP_004613	NP_990404	NP_001007517	NP_001020623
A06350	NP_001091896	XP_425835	NP_001039267	XP_692749
A06383	NP_001445	XP_001233327	NP_001011367	NP_001070174
A06389	NP_002757	XP_415620	NP_988953	NP_001002199
A06393	NP_001079	NP_990489	XP_002935979	NP_956998
A06396	NP_599030	NP_001008789	NP_001006870	NP_001019395
A06397	NP_006447	NP_990564	NP_989414	NP_001164693
A06402	NP_001073979	XP_003642385	XP_002935970	XP_003198246
A06534	NP_001137325	XP_003643500	NP_001016274	NP_956888
A06559	NP_443156	XP_418410	NP_001008116	XP_003200825
A06604	NP_006327	XP_415488	NP_001121438	NP_998066
A06629	NP_002000	NP_001012543	NP_001011366	NP_001007762
A06667	NP_036392	NP_001186557	NP_001017332	NP_998250
A06682	NP_057405	NP_001004370	NP_001003661	NP_001083046
A06698	NP_003838	XP_413859	NP_001025701	NP_001096590
A06739	NP_073153	XP_419303	NP_001072866	XP_001921168
A06751	NP_976313	NP_001026408	NP_001011069	NP_001004599
A06753	NP_478129	NP_990694	NP_001017156	NP_001008594
A06767	NP_982293	NP_990285	NP_001001252	NP_001004643
A06779	NP_001092906	XP_003641854	NP_001096673	NP_001082941
A06781	NP_002426	XP_001233064	XP_002937526	NP_001028282
A06787	NP_068595	XP_425049	XP_002938922	NP_957074
A06788	NP_073609	XP_001232098	XP_002937551	XP_002666818
A06790	NP_066288	NP_001131121	XP_002937552	NP_001124251
A06805	NP_005623	XP_414704	NP_001106511	XP_002663893
A06809	NP_001163894	XP_419860	XP_002938505	NP_001002212
A06862	NP_001035241	XP_417884	NP_001011299	NP_001074271
A06863	NP_065767	XP_003642648	XP_002937578	XP_002665458
A06885	NP_078799	NP_001026760	XP_002939415	NP_001003599
A06892	NP_002963	XP_415358	NP_001116493	NP_001038623
A06899	NP_001731	NP_990647	XP_002931730	NP_957012
A06903	NP_008858	NP_989811	XP_002931706	NP_001004012
A06914	NP_079160	XP_421462	XP_002938171	NP_001139067
A06917	NP_001135915	NP_001025556	NP_001120062	NP_001018136
A06920	NP_000933	NP_990792	NP_001017063	NP_998184
A06925	NP_003090	XP_425052	XP_002938918	NP_001122143
A06947	NP_004145	NP_990526	XP_002937285	XP_694459
A06954	NP_542780	NP_001026698	NP_001025524	NP_001003454
A06993	NP_071397	XP_417551	XP_002938538	XP_001922927
A07016	NP_001124336	XP_414485	XP_002940221	XP_687488
A07022	NP_055704	XP_418564	NP_001039262	NP_998652
A07024	NP_006733	XP_414024	NP_001017030	NP_001018546
A07026	NP_055144	XP_414022	XP_002935417	NP_001038550
A07037	NP_872345	XP_419489	XP_002942200	XP_002667399
A07044	NP_004609	NP_001025807	XP_002935889	XP_688695
A07079	NP_036563	NP_989573	XP_002935302	NP_001038549
A07082	NP_067063	XP_429193	NP_001243149	NP_001005779
A07104	NP_055194	XP_418390	XP_002939028	XP_688404
A07113	NP_068576	XP_416822	XP_002938293	NP_001007298
A07123	NP_114404	XP_001233110	NP_001072206	XP_003200094
A07134	NP_115700	NP_001026694	XP_002935867	NP_001003463
A07142	NP_005173	XP_414152	NP_001015903	NP_957107
A07150	NP_001437	NP_990639	NP_001015907	NP_571680
A07152	NP_065806	NP_001026245	NP_001011399	NP_956021
A07168	NP_005263	NP_990021	NP_001135577	NP_571944
A07170	NP_114142	XP_003643421	XP_002933041	XP_700010
A07173	NP_006383	NP_001026559	NP_001184132	NP_957511
A07213	NP_001793	NP_001025813	NP_001005649	XP_001921432
A07216	NP_037434	XP_414920	NP_001120146	NP_001002740
A07267	NP_003895	XP_003642643	NP_001017134	NP_998273
A07297	NP_001036167	XP_426573	XP_002935728	XP_001340677
A07301	NP_115805	XP_426530	NP_001006721	NP_001139078
A07315	NP_001006658	XP_419970	XP_002934527	NP_001139061
A07328	NP_115971	XP_415892	XP_002933869	XP_686236
A07356	NP_002517	XP_419855	XP_002933973	NP_957226
A07383	NP_060850	XP_425116	XP_002941020	NP_001070800
A07401	NP_001953	NP_990515	NP_001016422	NP_571101
A07452	NP_008962	XP_416754	XP_002942771	XP_694183
A07459	NP_055812	XP_425257	NP_001016816	NP_956555
A07460	NP_057562	NP_001186366	NP_001011259	NP_001070846
A07471	NP_031385	XP_423806	NP_001012670	NP_991279
A07483	NP_055864	XP_421937	XP_002936582	XP_689302
A07590	NP_002439	NP_990819	NP_001032329	NP_571348
A07635	NP_005003	NP_989840	XP_002931659	XP_696695
A07638	NP_065976	XP_422524	XP_002931660	XP_001334829
A07653	NP_004678	XP_415720	XP_002935239	XP_002667032
A07656	NP_001161299	NP_001026093	NP_001072648	NP_001244121
A07673	NP_004966	XP_425704	XP_002933211	XP_682848
A07707	NP_055981	XP_415981	NP_001072921	NP_001098409
A07723	NP_001242914	NP_001038130	XP_002935075	NP_001007332
A07747	NP_055446	XP_421741	XP_002936850	NP_001153494
A07778	NP_115874	XP_001232579	NP_001072344	XP_002665161
A07855	NP_115597	XP_003642493	XP_002932929	XP_699360
A07864	NP_775811	NP_989759	NP_001002904	NP_001070642
A07884	NP_001089	NP_989519	NP_001011445	NP_944590
A07887	NP_056519	XP_001233783	NP_001016799	NP_956994
A07889	NP_079202	XP_416208	NP_001096401	NP_001008617
A07939	NP_055635	XP_416605	NP_001096527	NP_956296
A07941	NP_064587	XP_416604	NP_001016633	NP_991174
A07965	NP_057039	NP_001182352	NP_001004925	NP_956088
A08015	NP_076921	NP_990242	XP_002938067	NP_571195
A08067	NP_624302	NP_998751	NP_001090874	XP_001341936
A08078	NP_116107	XP_416919	XP_002934569	XP_001921343
A08118	NP_079232	XP_430033	XP_002941133	XP_001923761
A08155	NP_005561	NP_001026570	NP_001234922	XP_688661
A08170	NP_079492	NP_001006590	XP_002934004	NP_571055
A08179	NP_001010854	NP_001006484	NP_001090808	NP_001074072
A08239	NP_849157	XP_420430	XP_002938981	XP_001919201
A08258	NP_055166	XP_416456	NP_001072322	NP_001035334
A08280	NP_057454	XP_001232252	NP_001072679	XP_001339262
A08305	NP_060336	NP_001012866	XP_002937119	XP_002660878
A08306	NP_001033791	XP_001231515	NP_001025494	NP_001153307
A08320	NP_006280	NP_989854	XP_002943409	NP_001009560
A08323	NP_079169	XP_415014	NP_001090818	XP_001332100
A08331	NP_002940	XP_001232214	NP_001006886	NP_001017696
A08336	NP_001035114	XP_001232172	NP_001039060	NP_001082969
A08343	NP_071429	NP_989693	XP_002936011	NP_001165168
A08384	NP_004228	XP_418892	NP_989228	NP_956876
A08398	NP_001106954	XP_417758	NP_001096378	NP_001038579
A08399	NP_078916	XP_417757	NP_001015837	NP_001077336
A08401	NP_005946	NP_001026666	XP_002939525	NP_694513
A08406	NP_004459	XP_417754	NP_001008165	XP_695478
A08431	NP_116207	NP_001182618	NP_001123759	NP_001007342
A08444	NP_060962	XP_420011	NP_001011346	NP_001002387
A08457	NP_056450	XP_415380	XP_002943194	NP_001002420
A08462	NP_000358	XP_418921	NP_001016410	NP_001002569
A08505	NP_203129	XP_001235592	XP_002937009	NP_001116445
A08549	NP_803238	XP_425228	XP_002931994	NP_001071120
A08554	NP_813977	XP_420992	NP_001007493	XP_697114
A08578	NP_003969	XP_413733	XP_002934620	NP_001038681
A08584	NP_000672	XP_426537	NP_001072843	NP_997520
A08619	NP_612142	XP_421854	NP_001008124	NP_956360
A08631	NP_006411	XP_417388	XP_002933226	XP_002666513
A08661	NP_064627	XP_418807	XP_002937787	XP_002666969
A08667	NP_073753	XP_418802	XP_002938351	NP_001014355
A08709	NP_996879	XP_416538	NP_001123754	XP_689610
A08802	NP_076957	XP_414816	NP_001120045	XP_002661358
A08833	NP_002457	NP_990649	XP_002932915	NP_001003867
A08836	NP_001136093	XP_416922	XP_002941202	NP_001077023
A08848	NP_006051	NP_990419	NP_001015698	NP_571061
A08854	NP_775748	XP_426242	XP_002939606	XP_002661315
A08861	NP_055418	XP_426243	XP_002940026	NP_991127
A08871	NP_008868	NP_001074186	NP_001016406	NP_001003422
A08873	NP_619525	NP_001026279	NP_001123854	NP_001082823
A08877	NP_003646	NP_989973	NP_001096327	NP_991312
A08878	NP_061893	XP_001231439	XP_002935434	NP_001006076
A08879	NP_060420	XP_420086	XP_002937644	XP_697018
A08883	NP_001159819	XP_001231563	XP_002937354	NP_956061
A08919	NP_001128683	XP_415708	NP_989052	NP_001122145
A08958	NP_001542	XP_001231445	NP_001072440	NP_998687
A09016	NP_055653	NP_001186470	XP_002932232	NP_001076410
A09066	NP_001123990	XP_420453	XP_002934039	XP_001333479
A09083	NP_076983	XP_003642221	NP_001007892	NP_001019568
A09098	NP_150279	XP_416581	NP_001072742	NP_001005393
A09112	NP_055852	NP_001182529	XP_002935813	NP_001139179
A09164	NP_001093392	XP_420312	XP_002938835	NP_001027008
A09184	NP_660348	XP_420343	XP_002934585	NP_001004497
A09194	NP_859052	XP_415413	NP_001121505	XP_688053
A09197	NP_653254	NP_001025852	NP_001096544	XP_687957
A09201	NP_056262	XP_415410	XP_002943281	NP_001093471
A09204	NP_065873	NP_989893	NP_001163984	XP_001920632
A09236	NP_006132	NP_001025744	XP_002933697	NP_001017669
A09271	NP_009017	XP_421449	XP_002936948	NP_001002726
A09293	NP_001129058	XP_414628	NP_001072358	NP_998065
A09325	NP_064576	XP_422638	XP_002933390	XP_003200059
A09369	NP_620162	XP_425154	XP_002941785	NP_001032196
A09374	NP_004277	NP_001188376	NP_001072172	NP_998640
A09422	NP_000163	NP_990022	NP_001096278	NP_571943
A09423	NP_004177	NP_989589	NP_001011157	XP_001921106
A09439	NP_056120	NP_001026376	NP_001016236	XP_698034
A09470	NP_001013649	XP_420135	XP_002936835	XP_001334053
A09498	NP_001152	XP_424973	NP_001006918	NP_001002323
A09506	NP_001001933	NP_001035556	NP_001015899	NP_001003980
A09521	NP_002431	XP_422549	XP_002936134	XP_688406
A09526	NP_640335	XP_413901	XP_002938392	NP_001071010
A09537	NP_003404	XP_420237	NP_001005691	NP_001001950
A09584	NP_001034933	XP_429769	NP_001165067	NP_001122240
A09586	NP_004799	XP_418632	NP_001072266	NP_001186683
A09598	NP_005500	XP_424958	XP_002931778	XP_003199080
A09635	NP_036442	NP_990306	NP_001006741	NP_957117
A09685	NP_055149	XP_419045	XP_002943293	XP_003200244
A09724	NP_001157814	XP_416569	XP_002939695	NP_001074073
A09745	NP_116164	XP_415234	NP_001072910	XP_003199199
A09752	NP_001027536	XP_415238	NP_001006724	XP_697468
A09815	NP_001111	XP_420825	XP_002941001	NP_001017667
A09896	NP_072093	XP_426475	XP_002933779	XP_686241
A09905	NP_004785	XP_001231925	NP_001072527	NP_001038893
A09919	NP_064547	XP_001233396	XP_002932324	NP_001093527
A09930	NP_115575	NP_001026391	XP_002939588	XP_003199620
A09953	NP_064505	XP_422579	XP_002936344	NP_001071002
A09957	NP_060515	NP_001012860	NP_001025634	NP_001004108
A09979	NP_002088	NP_001107043	XP_002941582	NP_001003866
A09981	NP_699202	XP_417122	NP_001072606	NP_001106696
A09989	NP_003244	XP_416699	XP_002938487	XP_001924044
A10086	NP_115951	XP_421584	NP_001007917	NP_998595
A10110	NP_002638	XP_003642950	XP_002935097	NP_001017550
A10146	NP_064714	XP_426627	XP_002931515	XP_695417
A10158	NP_001019784	XP_003640395	NP_001072463	NP_001107820
A10191	NP_000497	NP_989936	NP_001015797	NP_998555
A10201	NP_001164006	XP_417573	NP_998849	NP_991266
A10213	NP_872317	NP_001165239	NP_001106397	NP_001092208
A10277	NP_653172	XP_420472	NP_001120421	NP_001018474
A10281	NP_009135	XP_417996	XP_002932842	NP_001116795
A10290	NP_055619	XP_415926	XP_002933591	XP_692102
A10298	NP_444515	XP_415931	NP_001016652	NP_001007398
A10301	NP_001107590	NP_001012823	NP_001005015	NP_956437
A10312	NP_004161	XP_424930	XP_002934228	NP_001002666
A10379	NP_036257	NP_001026721	XP_002935387	NP_001018639
A10381	NP_064539	XP_421207	NP_001072567	NP_001020686
A10430	NP_443134	NP_001012936	NP_989177	NP_956582
A10432	NP_002182	NP_001026428	NP_001027522	NP_001038669
A10440	NP_852091	XP_422777	NP_001072342	XP_682709
A10448	NP_004064	XP_422425	NP_001006766	NP_958465
A10472	NP_955352	XP_003641225	NP_001090707	NP_956099
A10487	NP_006818	NP_001006482	NP_001016258	NP_999863
A10508	NP_997400	XP_413844	XP_002940148	XP_003198947
A10633	NP_008967	XP_428357	NP_001120192	NP_001070209
A10649	NP_006852	NP_001025840	NP_989019	NP_001003548
A10690	NP_056321	NP_001026452	NP_001016931	NP_001108361
A10694	NP_009101	XP_003641736	NP_001072346	NP_001103946
A10709	NP_001091738	NP_001025987	NP_001016981	NP_001096593
A10749	NP_001073985	XP_001234901	XP_002935322	XP_003200947
A10781	NP_060760	NP_001026554	NP_001016701	NP_998051
A10852	NP_001073906	XP_003641796	XP_002933383	XP_001341690
A10854	NP_714542	XP_003643058	NP_001008167	XP_002666723
A10864	NP_001034201	XP_003640913	XP_002941446	XP_003199239
A10877	NP_878274	XP_003641968	XP_002939923	XP_001922916
A10879	NP_149110	XP_414094	NP_001016798	NP_001036798
A10882	NP_001171505	XP_422126	NP_001106464	XP_001345654
A10908	NP_060401	XP_424236	NP_001004945	NP_001018535
A10942	NP_115496	NP_001026145	XP_002934632	NP_991167
A10943	NP_000457	XP_418655	XP_002934633	XP_003200668
A10950	NP_001171478	XP_420621	XP_002941100	XP_002667252
A10989	NP_060720	NP_001026271	NP_001016601	NP_001070738
A10992	NP_057383	XP_416996	NP_001015780	NP_001038541
A10998	NP_065154	NP_001073199	NP_001011357	NP_001116521
A11026	NP_001093203	NP_001001291	NP_001096425	NP_999880
A11083	NP_054889	XP_416585	XP_002940516	NP_001119874
A11208	NP_002677	XP_003642859	XP_002940421	XP_002666387
A11233	NP_653191	XP_001234693	NP_001106561	NP_956568
A11255	NP_001243338	XP_422489	XP_002931475	NP_956041
A11278	NP_114406	NP_989797	NP_001120455	XP_693275
A11320	NP_001099040	NP_001026629	NP_001004903	NP_001122258
A11327	NP_061908	XP_420404	NP_001011150	NP_001108571
A11464	NP_075387	XP_416933	XP_002937909	NP_001189377
A11487	NP_001239	XP_426007	NP_001096408	NP_001077050
A11515	NP_001028218	XP_415607	NP_001072837	NP_001002669
A11527	NP_003591	XP_425725	NP_001016570	NP_001003640
A11528	NP_001028693	XP_417500	NP_001001220	NP_997835
A11585	NP_066564	NP_989660	XP_002939088	XP_001922732
A11611	NP_055289	NP_001239209	XP_002939398	XP_692822
A11639	NP_003097	NP_990519	NP_998869	NP_998283
A11688	NP_036604	XP_418433	NP_001032332	NP_001002311
A11721	NP_542194	XP_003642547	XP_002942331	XP_001338362
A11723	NP_001189	XP_003641086	XP_002937203	NP_955809
A11732	NP_055146	XP_426289	XP_002932094	XP_001919426
A11766	NP_000051	NP_001186553	XP_002932835	NP_001039309
A11845	NP_001698	XP_003643279	NP_001096542	NP_998330
A11847	NP_115784	XP_001233717	XP_002933656	XP_003200529
A11856	NP_536856	XP_003643088	XP_002934036	XP_002660627
A11872	NP_000288	NP_001026311	XP_002938673	NP_001002310
A11904	NP_001396	NP_990314	NP_001116892	XP_002663773
A11952	NP_002370	XP_003642610	NP_001025613	NP_001093210
A11969	NP_000855	XP_003642607	XP_002938881	NP_001139158
A11981	NP_002401	XP_422131	NP_001120456	NP_001038776
A12009	NP_001878	NP_989511	NP_001017268	NP_775338
A12023	NP_001601	NP_001026719	NP_001072207	NP_001013355
A12038	NP_056369	XP_003641912	XP_002932993	NP_998014
A12072	NP_004665	NP_001026566	XP_002932769	NP_001103575
A12073	NP_000340	NP_990017	XP_002932770	NP_571738
A12083	NP_000774	NP_001001129	NP_001016147	NP_571221
A12088	NP_116586	NP_999837	NP_001072483	NP_997736
A12111	NP_036336	XP_415450	XP_002936231	XP_696935
A12140	NP_002418	XP_003640635	XP_002934971	XP_001345507
A12149	NP_006014	XP_424021	NP_001017200	NP_957015
A12219	NP_001472	XP_414217	NP_001106441	NP_955928
A12225	NP_775822	XP_419064	NP_001123839	NP_001005928
A12229	NP_612490	NP_001239205	XP_002934783	XP_002663992
A12296	NP_543136	XP_416745	XP_002942595	XP_002663388
A12307	NP_000781	XP_419032	NP_001011289	NP_998507
A12344	NP_004174	XP_421055	NP_001155223	XP_689098
A12347	NP_079368	XP_420923	XP_002939378	NP_001071193
A12350	NP_001914	NP_989547	XP_002937687	NP_956920
A12377	NP_060376	NP_001026170	NP_001017054	NP_957239
A12388	NP_597725	NP_001007081	NP_001037867	NP_001018323
A12439	NP_000674	XP_426355	NP_001120375	NP_997522
A12562	NP_005284	XP_425941	XP_002934513	XP_001334394
A12570	NP_001034703	XP_413700	NP_001135683	NP_001073418
A12582	NP_443191	XP_001231503	XP_002940053	XP_001919861
A12599	NP_057154	XP_003642463	XP_002932318	NP_001003615
A12632	NP_065876	XP_415057	XP_002932497	XP_003198126
A12649	NP_008914	XP_417569	XP_002935198	NP_001017890
A12654	NP_006223	XP_422761	NP_001016113	NP_001017600
A12657	NP_060696	XP_422753	NP_001186875	XP_003200537
A12680	NP_001099007	XP_422062	XP_002934000	XP_690036
A12712	NP_997274	NP_989836	XP_002934419	XP_687644
A12728	NP_000528	XP_003642787	XP_002940408	NP_998025
A12756	NP_001193927	XP_415210	NP_001072864	XP_684807
A12800	NP_859059	XP_428854	XP_002935777	XP_696793
A12864	NP_078911	NP_001026623	NP_001186425	NP_955844
A12876	NP_006822	NP_001012292	NP_001008002	XP_693984
A12893	NP_000730	NP_001025936	XP_002942846	NP_840086
A12898	NP_671766	NP_001012900	NP_001106383	XP_691744
A12899	NP_001013685	XP_420022	NP_001096530	NP_001025446
A12947	NP_000731	NP_990730	XP_002935876	XP_700381
A12951	NP_002872	XP_003641666	NP_001096315	NP_001003649
A13007	NP_001155967	XP_416709	NP_001004889	XP_002664121
A13033	NP_055946	NP_001006396	XP_002938471	NP_001018176
A13037	NP_036576	XP_001232076	NP_001008200	NP_991245
A13069	NP_065142	XP_422785	NP_001107535	XP_686002
A13087	NP_443185	XP_418756	XP_002932448	NP_001082985
A13093	NP_031375	XP_418546	XP_002932542	NP_001005929
A13161	NP_065749	XP_416147	NP_001072261	NP_001038278
A13203	NP_001243893	XP_414385	NP_001120543	NP_001038927
A13204	NP_057017	XP_001234206	NP_001016374	NP_001153306
A13209	NP_077269	XP_422050	NP_001121425	NP_001073483
A13221	NP_000591	NP_989959	XP_002933340	NP_001248378
A13280	NP_005622	XP_414970	XP_002931911	NP_571102
A13282	NP_001140158	XP_003641837	XP_002934086	XP_001921214
A13302	NP_078921	XP_424398	XP_002936484	XP_003198682
A13345	NP_004801	XP_001234082	XP_002933793	NP_001017756
A13404	NP_055777	XP_425262	NP_001090697	XP_003199784
A13583	NP_065975	XP_003642347	NP_001016018	NP_001116097
A13585	NP_940871	XP_001235419	NP_001016143	NP_001019584
A13592	NP_004051	XP_003642095	NP_001006698	NP_955775
A13593	NP_036616	XP_414495	XP_002935941	NP_955874
A13603	NP_054829	NP_001026062	NP_001017079	NP_001094422
A13620	NP_001073270	XP_424885	NP_001096364	NP_001036159
A13634	NP_008942	XP_413866	NP_001135535	NP_957208
A13637	NP_839946	XP_413868	NP_001016048	NP_998266
A13650	NP_002560	NP_990046	XP_002932287	NP_001038574
A13664	NP_073565	XP_418852	NP_001072273	NP_571891
A13669	NP_001035714	NP_990474	NP_001123413	NP_001107882
A13671	NP_008882	NP_001026406	NP_001135586	NP_001032508
A13677	NP_660328	NP_990362	XP_002937234	NP_571498
A13710	NP_663622	XP_418456	NP_001005061	XP_695006
A13747	NP_068600	XP_421704	XP_002937229	XP_691045
A13756	NP_079527	XP_417317	XP_002932938	NP_001007296
A13794	NP_000080	NP_001073182	NP_001072718	NP_892013
A13799	NP_000093	NP_001001901	NP_001120517	NP_997971
A13802	NP_004302	XP_421730	XP_002938771	NP_001038373
A13811	NP_115718	XP_430497	NP_001072549	NP_001070809
A13847	NP_001070818	XP_414946	NP_001096273	NP_001020705
A13866	NP_002808	XP_003641330	NP_001005429	NP_957242
A13891	NP_063940	XP_415152	NP_001016281	NP_956640
A13895	NP_060082	NP_001025833	NP_001135573	NP_001077287
A14040	NP_001093869	NP_001012598	XP_002933500	NP_957286
A14149	NP_056089	XP_420805	NP_001106515	XP_001337519
A14155	NP_005251	NP_996871	XP_002935305	NP_001012383
A14160	NP_008985	NP_001025793	XP_002935308	NP_001017604
A14198	NP_079032	XP_421496	XP_002937618	NP_001139178
A14219	NP_777571	XP_001234102	XP_002938709	NP_001038345
A14227	NP_057147	XP_419755	XP_002936040	NP_001038696
A14228	NP_003278	NP_989546	XP_002936056	NP_001018570
A14233	NP_000349	NP_990367	NP_001072329	NP_878282
A14259	NP_573566	XP_001234903	NP_001039203	NP_001136064
A14268	NP_001165074	NP_001026224	XP_002932436	NP_001139088
A14274	NP_078790	XP_420996	NP_001106483	XP_691824
A14281	NP_000256	NP_001025880	NP_001106375	NP_001025242
A14355	NP_001166995	XP_422201	XP_002939107	NP_001032474
A14410	NP_444278	NP_001186402	NP_001005117	NP_001004653
A14446	NP_055440	XP_422265	XP_002937013	NP_001018155
A14451	NP_000211	XP_425795	XP_002934921	NP_001092204
A14465	NP_113609	XP_003642871	XP_002939085	XP_003198130
A14469	NP_001124193	NP_001026710	NP_001017257	NP_955826
A14487	NP_055454	XP_424706	NP_001121453	XP_002662144
A14499	NP_001028198	XP_418222	NP_001072254	XP_700127
A14536	NP_079021	XP_003641983	NP_001037966	NP_956137
A14542	NP_689919	XP_001234375	XP_002937064	XP_001345431
A14547	NP_001121143	NP_989906	XP_002938237	NP_001014328
A14564	NP_003859	NP_001038115	XP_002931859	NP_001035497
A14572	NP_006508	XP_426274	XP_002931873	NP_001245159
A14585	NP_057038	NP_001006248	NP_001004891	NP_001006097
A14597	NP_001121646	NP_989535	XP_002934292	NP_001037790
A14610	NP_945314	XP_424198	NP_001163976	XP_001921063
A14639	NP_060934	NP_001186458	NP_001004811	NP_956899
A14649	NP_002514	XP_414750	NP_001096304	NP_001103238
A14682	NP_001128525	NP_001186471	XP_002937693	NP_001091720
A14702	NP_116262	XP_417888	NP_001096431	XP_001923885
A14723	NP_001258357	NP_001012856	XP_002943252	XP_693770
A14727	NP_940947	NP_001136320	XP_002937569	NP_001028899
A14729	NP_056372	XP_003642567	XP_002937591	XP_003199545
A14762	NP_004223	NP_001120784	NP_001096240	XP_687041
A14802	NP_036223	NP_001012797	NP_001037984	NP_001076356
A14803	NP_009216	XP_001232689	NP_001096511	NP_991286
A14808	NP_001037834	XP_419100	XP_002941925	NP_997916
A14819	NP_000830	XP_425148	XP_002935662	XP_002662553
A14854	NP_003921	XP_418727	NP_001107684	NP_956922
A14881	NP_277045	XP_426392	XP_002940542	NP_997599
A14895	NP_620594	XP_415435	XP_002942962	XP_002663267
A14897	NP_057253	NP_989595	NP_001123387	NP_958466
A14905	NP_006053	NP_001012912	NP_001107677	NP_001004614
A14919	NP_055752	XP_421792	XP_002940391	NP_001119904
A14940	NP_065714	XP_421413	XP_002939520	NP_001038266
A14948	NP_001034449	XP_429131	XP_002936550	XP_003200858
A14956	NP_000778	XP_415429	XP_002942324	NP_001103164
A14991	NP_055445	XP_413721	NP_001072160	NP_001038678
A15000	NP_694560	XP_003640901	XP_002938960	XP_002665015
A15017	NP_612639	NP_001026094	NP_001016717	NP_956580
A15024	NP_000994	NP_990653	NP_001017204	NP_956323
A15026	NP_078867	NP_001026700	NP_001096541	NP_001003874
A15031	NP_001014402	XP_417114	XP_002934061	NP_001007432
A15038	NP_002491	NP_990251	NP_001090868	NP_571053
A15064	NP_002236	XP_419561	NP_001011490	NP_001092223
A15114	NP_055764	NP_001026499	NP_001072751	NP_997758
A15115	NP_060666	NP_001012593	NP_001096300	XP_682831
A15150	NP_078822	XP_416999	XP_002931970	XP_001343289
A15157	NP_001001436	XP_414112	NP_001120113	NP_001002512
A15171	NP_002022	XP_419779	XP_002938349	XP_695937
A15322	NP_115867	NP_001108101	NP_001017146	NP_998110
A15344	NP_851607	NP_001012613	XP_002933830	NP_955951
A15357	NP_077816	XP_416881	XP_002931688	XP_695556
A15369	NP_060059	XP_417919	NP_001016397	NP_937754
A15376	NP_003067	XP_424488	NP_001004862	NP_938172
A15377	NP_671723	XP_424486	XP_002935791	NP_955922
A15384	NP_065882	XP_416243	NP_001072754	NP_001188487
A15386	NP_003571	XP_003640887	NP_001121464	XP_003199050
A15428	NP_003460	XP_422624	NP_001072311	NP_001071216
A15438	NP_931045	NP_001025863	NP_001016353	NP_001119877
A15460	NP_110447	XP_419902	XP_002934910	XP_002664126
A15527	NP_061907	NP_001025831	NP_001016369	NP_001018478
A15529	NP_776254	XP_003642226	XP_002937740	NP_001017666
A15537	NP_001137251	NP_001239238	XP_002937744	NP_001002313
A15538	NP_001672	XP_003642224	XP_002937737	NP_957259
A15568	NP_112205	XP_421379	XP_002938043	XP_002661318
A15572	NP_001129145	XP_003640977	XP_002940441	NP_001103492
A15575	NP_001243298	NP_001039305	XP_002940844	NP_001231645
A15601	NP_008879	NP_001025964	NP_001017223	NP_001082948
A15632	NP_001229341	NP_001188316	XP_002935182	NP_001029092
A15665	NP_115737	NP_001025782	NP_001121394	NP_001003758
A15680	NP_000857	XP_425535	XP_002931817	XP_001344430
A15768	NP_115827	XP_414215	XP_002933730	NP_001007343
A15769	NP_055787	XP_423211	NP_001072790	NP_001005399
A15777	NP_001154	XP_424829	XP_002935634	XP_001343372
A15788	NP_000822	XP_417766	XP_002938663	XP_002664816
A15790	NP_006406	XP_423815	NP_001073042	NP_001018307
A15869	NP_060289	XP_001232374	NP_001096307	NP_001007333
A15909	NP_060592	XP_422251	XP_002931512	XP_699804
A16004	NP_056066	XP_423809	XP_002938191	NP_001093512
A16022	NP_005202	XP_414597	NP_001008181	NP_571747
A16038	NP_055453	XP_425738	XP_002936604	XP_003199185
A16041	NP_000974	NP_989472	NP_001016655	NP_001032766
A16042	NP_997279	XP_417536	XP_002937592	NP_001188378
A16076	NP_005258	NP_990328	XP_002940515	NP_571884
A16110	NP_689969	XP_003643026	XP_002938239	XP_001921907
A16172	NP_116126	NP_990616	XP_002940085	NP_571077
A16174	NP_892018	XP_425880	XP_002940084	XP_001922711
A16176	NP_057283	NP_001006337	NP_001165133	NP_001041471
A16215	NP_056468	XP_416468	NP_001135700	NP_001230078
A16251	NP_758952	XP_003640465	XP_002938150	XP_696635
A16261	NP_001073909	XP_426716	XP_002933297	XP_701165
A16275	NP_689520	XP_421386	NP_001005009	NP_001002321
A16276	NP_001015048	NP_001026382	NP_001124516	NP_001029355
A16290	NP_009125	NP_001073576	NP_001119996	NP_956339
A16291	NP_775813	XP_003642281	XP_002939239	NP_001076460
A16293	NP_001137291	XP_415322	XP_002934333	XP_695923
A16308	NP_001008749	XP_416347	NP_001017246	XP_683305
A16320	NP_001004356	NP_989787	NP_001011189	NP_956670
A16345	NP_005957	NP_989599	NP_001120223	NP_001116745
A16347	NP_060164	XP_421837	XP_002941640	NP_001076525
A16416	NP_005886	XP_415085	XP_002931924	NP_001122017
A16418	NP_002216	NP_001186490	NP_001011380	NP_958899
A16479	NP_001138683	XP_417242	NP_001096429	NP_001032767
A16624	NP_064575	NP_001035107	NP_001072318	NP_001070719
A16645	NP_570124	NP_001128637	NP_001121415	NP_956524
A16667	NP_689878	XP_422530	XP_002939022	NP_001004623
A16668	NP_079039	XP_426670	NP_001106504	NP_001018595
A16715	NP_037514	XP_421287	XP_002938909	NP_001038498
A16723	NP_775825	XP_421543	XP_002939590	NP_001170934
A16725	NP_004180	NP_990092	NP_001093703	NP_001032769
A16753	NP_689698	XP_001235153	NP_001011022	NP_001017723
A16755	NP_002089	NP_001007882	XP_002933553	NP_571946
A16770	NP_000487	NP_990506	NP_001238879	NP_001018138
A16771	NP_004067	NP_990522	XP_002932114	NP_001018140
A16794	NP_001012426	XP_003642796	NP_001070655	NP_001186420
A16797	NP_001093112	XP_425111	XP_002931731	NP_998598
A16799	NP_003375	NP_001006485	NP_988955	NP_998550
A16802	NP_689540	XP_426462	NP_001011352	NP_001103168
A16810	NP_061917	NP_001026433	NP_001008173	NP_001035414
A16838	NP_079437	NP_001092080	XP_002940136	XP_001341227
A16861	NP_116208	NP_001026020	XP_002932926	NP_001108045
A16862	NP_009169	XP_417337	XP_002932902	XP_694422
A16878	NP_001098991	XP_426548	XP_002932702	XP_002664097
A16930	NP_079428	XP_421229	NP_001016573	NP_001002442
A16994	NP_060287	XP_416953	NP_001017295	NP_997936
A17036	NP_001131147	XP_425139	XP_002937622	XP_001333781
A17049	NP_874364	XP_415867	NP_001008059	XP_002664671
A17097	NP_653173	XP_413750	NP_001039198	XP_002666912
A17158	NP_005094	XP_423333	NP_001072905	NP_998561
A17169	NP_056449	NP_001007945	NP_001072796	NP_001013480
A17206	NP_909119	XP_001233774	NP_001123414	XP_002666143
A17216	NP_004555	XP_420446	XP_002933542	NP_001013464
A17239	NP_115752	XP_003643860	NP_988884	XP_700929
A17245	NP_060385	NP_001025934	NP_001039039	NP_001035470
A17328	NP_057179	XP_414187	NP_001017015	NP_001019610
A17361	NP_071355	XP_416643	XP_002931821	NP_001020473
A17420	NP_002778	NP_001012878	NP_001016382	NP_001019612
A17431	NP_001879	XP_424610	NP_001096532	NP_001074156
A17458	NP_001092740	NP_001012813	XP_002942007	NP_001116183
A17459	NP_001129248	XP_415377	NP_001072352	NP_001103494
A17475	NP_061137	XP_429344	XP_002939922	NP_001116222
A17503	NP_000997	NP_001075886	NP_001008075	NP_956353
A17540	NP_852615	NP_001186447	NP_001016810	NP_001070936
A17563	NP_071440	NP_001026067	NP_001016835	NP_001018471
A17565	NP_110399	XP_003642626	XP_002938784	NP_571887
A17585	NP_004115	NP_001026385	NP_001017002	NP_998275
A17630	NP_660337	XP_003642210	NP_001090645	XP_003201394
A17666	NP_065769	XP_003642194	XP_002932037	XP_692912
A17686	NP_005510	XP_001231298	XP_002937849	NP_001108570
A17696	NP_001138135	NP_001186424	NP_001135580	NP_919403
A17709	NP_659486	NP_001025784	NP_001016061	NP_001002319
A17713	NP_001091740	NP_001012711	XP_002933794	XP_699442
A17739	NP_073605	XP_003642784	XP_002933032	XP_001335820
A17751	NP_001121896	XP_420382	XP_002934793	XP_694732
A17755	NP_001790	XP_001234587	NP_001017219	NP_998126
A17772	NP_073739	XP_413970	XP_002936459	XP_695496
A17776	NP_060422	XP_420852	NP_001072165	NP_001032449
A17903	NP_036436	XP_426048	XP_002933169	NP_001073511
A17929	NP_001129665	XP_421951	XP_002937162	XP_692810
A17953	NP_073754	XP_425621	NP_001093700	XP_001345843
A17978	NP_001073901	NP_001172076	NP_001017273	XP_001345910
A17996	NP_060439	XP_422571	NP_001025690	XP_002664782
A18004	NP_005257	NP_990835	XP_002940510	NP_001030160
A18044	NP_203751	XP_420449	XP_002933539	XP_001920056
A18109	NP_115509	XP_420104	XP_002939624	XP_001345218
A18120	NP_071450	NP_001001785	NP_001006733	NP_001124250
A18143	NP_001099043	XP_001232841	NP_001135592	NP_956889
A18171	NP_821133	NP_990646	NP_001006895	NP_942113
A18182	NP_000268	NP_001001298	NP_001027484	NP_956845
A18260	NP_036270	NP_001025895	NP_001016308	NP_001077297
A18306	NP_733751	XP_418542	XP_002932540	XP_001919281
A18328	NP_116053	NP_989761	NP_001002903	NP_001012374
A18356	NP_741995	XP_420326	XP_002931827	NP_001092211
A18362	NP_689637	XP_420290	XP_002931878	XP_001341956
A18365	NP_786923	XP_003640968	NP_001008191	NP_001103863
A18377	NP_054887	XP_001233695	NP_001025663	NP_001005949
A18393	NP_068773	NP_001035734	NP_001107721	NP_997525
A18408	NP_056201	NP_001012793	NP_001120535	NP_001034912
A18419	NP_001107781	XP_419257	XP_002933035	XP_002666146
A18420	NP_004758	XP_419256	NP_001072523	XP_696192
A18426	NP_001231063	XP_418581	XP_002940379	XP_692177
A18427	NP_060579	XP_418580	XP_002940378	XP_692256
A18452	NP_003379	XP_415736	XP_002932337	XP_684289
A18453	NP_008854	XP_003642473	NP_001016483	NP_956333
A18455	NP_001167574	XP_003642472	XP_002937672	XP_003200943
A18477	NP_001182208	XP_414310	NP_001096474	XP_001920208
A18485	NP_001191812	XP_414313	NP_001016330	NP_001038812
A18515	NP_004804	XP_421125	NP_001120111	NP_001020340
A18517	NP_005447	XP_421126	XP_002934139	XP_003201433
A18527	NP_570971	XP_413766	XP_002937932	XP_003201514
A18528	NP_057079	XP_425065	NP_001093690	NP_001070240
A18561	NP_071919	NP_001186634	XP_002937246	NP_919344
A18576	NP_443176	XP_414862	XP_002932483	NP_001007301
A18605	NP_000394	XP_417833	NP_001006762	NP_001035389
A18607	NP_056299	NP_001244223	NP_001032340	NP_001003437
A18649	NP_000859	XP_426265	XP_002937099	NP_001123365
A18664	NP_659403	XP_424932	XP_002939136	NP_001177237
A18843	NP_114148	XP_423365	NP_001011378	NP_001017574
A18914	NP_057677	XP_420063	XP_002937993	NP_001025360
A18915	NP_612213	XP_419156	NP_001027496	NP_001004569
A18919	NP_005248	NP_990751	NP_989422	NP_571632
A18927	NP_115731	XP_003642014	XP_002935672	NP_001092240
A18985	NP_000851	XP_420526	NP_001007992	XP_694331
A19067	NP_001186797	XP_421826	NP_001017209	NP_001005950
A19078	NP_001106873	XP_416368	XP_002941655	NP_001038919
A19079	NP_001129335	XP_416369	XP_002941663	NP_001154967
A19095	NP_001121775	XP_417036	XP_002937177	XP_001919421
A19101	NP_005575	NP_989864	NP_001072797	NP_694506
A19129	NP_001230723	XP_414775	NP_001015949	NP_998712
A19159	NP_002614	XP_417503	NP_001163965	XP_002666565
A19165	NP_063941	XP_003642521	XP_002935436	NP_851303
A19322	NP_056164	XP_426124	XP_002934727	XP_687482
A19335	NP_071361	NP_001185469	NP_001120471	NP_001074099
A19336	NP_068804	NP_001026064	XP_002936259	NP_001243120
A19338	NP_689578	XP_001232503	NP_001072939	XP_001338378
A19412	NP_000622	NP_001034361	NP_001025692	NP_991274
A19450	NP_851320	XP_416987	NP_001135514	XP_002662615
A19512	NP_057170	XP_003642439	XP_002933863	NP_001004619
A19523	NP_078928	XP_003641870	XP_002939309	XP_002667476
A19524	NP_055733	XP_413889	NP_001090724	NP_997843
A19528	NP_001070710	NP_001186335	NP_001072183	NP_001038734
A19542	NP_005086	XP_417783	NP_001123397	NP_001037777
A19622	NP_079435	XP_003640560	XP_002937711	XP_001334272
A19693	NP_000385	NP_001025968	XP_002944595	NP_694482
A19701	NP_061822	XP_425371	XP_002935992	XP_687540
A19712	NP_001017916	XP_003642826	NP_001005633	NP_001122216
A19758	NP_001035257	NP_990279	NP_001017051	NP_571046
A19782	NP_000185	NP_990179	NP_989312	NP_998151
A19791	NP_079130	XP_416422	NP_001120558	NP_957057
A19792	NP_002898	NP_989724	NP_001016316	NP_001038561
A19811	NP_689677	XP_415812	NP_001120106	NP_001099067
A19814	NP_060598	XP_003642451	XP_002937187	NP_001032447
A19816	NP_060045	XP_001234885	XP_002937186	XP_002663657
A19826	NP_001094846	XP_422395	XP_002931631	XP_001332180
A19847	NP_490645	NP_990862	NP_001017208	NP_571021
A19880	NP_057332	XP_417031	NP_001120158	XP_686916
A19894	NP_000691	NP_996789	NP_001006702	NP_861423
A19929	NP_056477	XP_419993	XP_002943869	NP_001002312
A19930	NP_037524	NP_001006420	NP_001005659	NP_001038654
A19992	NP_001092877	NP_001186325	NP_001121433	NP_001038395
A20039	NP_079143	XP_003643024	XP_002940003	NP_001121704
A20046	NP_653200	XP_003640574	XP_002937031	NP_001006062
A20056	NP_116184	XP_001231937	NP_001039205	NP_001003495
A20057	NP_112597	XP_417852	NP_988969	NP_956361
A20099	NP_001245205	XP_424670	XP_002936350	NP_001038265
A20140	NP_981932	XP_419670	NP_001011267	XP_002666468
A20188	NP_001013012	XP_424910	NP_001016905	NP_001017798
A20198	NP_006197	NP_990080	NP_001096290	NP_571534
A20210	NP_001138600	XP_003641084	XP_002940598	XP_685909
A20238	NP_694972	XP_418790	NP_001072733	NP_001189370
A20321	NP_001010844	XP_419874	XP_002935125	NP_001018607
A20327	NP_114436	NP_001107233	NP_989240	NP_942577
A20363	NP_002787	XP_427542	NP_001011182	NP_001017801
A20383	NP_056997	XP_001235373	XP_002931500	NP_001018660
A20410	NP_060193	XP_415532	NP_001025600	NP_001017561
A20440	NP_065907	XP_414125	XP_002934421	NP_001182336
A20555	NP_997264	XP_425071	XP_002936389	NP_956645
A20558	NP_002696	XP_414712	XP_002941094	NP_001131138
A20612	NP_001008708	NP_001026203	NP_001017137	NP_001025128
A20614	NP_006785	XP_003640943	XP_002936968	XP_003199788
A20616	NP_057086	NP_001012893	XP_002943932	NP_001002359
A20652	NP_061198	XP_003641891	XP_002936392	XP_691143
A20679	NP_001783	NP_001001615	NP_001120890	NP_571156
A20691	NP_060494	XP_418452	XP_002941442	NP_001038412
A20765	NP_002205	XP_003640734	XP_002933344	XP_001919626
A20768	NP_877439	XP_418705	XP_002933345	NP_001186695
A20809	NP_065773	XP_420698	XP_002934718	XP_698883
A20859	NP_003029	XP_001232900	NP_001096391	NP_001002513
A20964	NP_005217	XP_428818	XP_002937075	XP_002665884
A20978	NP_005460	XP_417475	XP_002932556	NP_001006072
A21008	NP_874359	NP_001185595	XP_002933331	NP_991113
A21010	NP_055592	XP_419580	XP_002931550	NP_001116773
A21012	NP_036221	XP_419578	XP_002944367	XP_001343218
A21015	NP_003709	XP_418864	XP_002940845	XP_687417
A21071	NP_057532	NP_001026219	NP_989402	NP_775348
A21085	NP_001165644	XP_001235289	XP_002936804	XP_002667402
A21092	NP_000245	NP_001026275	XP_002933914	NP_932338
A21099	NP_996531	XP_416971	XP_002944740	NP_001032493
A21115	NP_036214	XP_418380	XP_002931609	NP_001034724
A21203	NP_689755	XP_420574	XP_002938669	XP_690577
A21213	NP_055203	NP_001026222	NP_001008035	NP_775380
A21220	NP_998761	NP_001076828	NP_001096332	NP_571174
A21222	NP_114160	XP_415191	NP_001016558	NP_998643
A21233	NP_001017995	XP_425197	NP_001016567	XP_003200955
A21238	NP_689490	XP_429403	NP_001095277	NP_001002718
A21272	NP_005977	NP_989664	NP_001074465	NP_001002483
A21296	NP_115724	NP_989967	NP_001116197	NP_001074051
A21341	NP_000404	NP_990168	XP_002935954	NP_991147
A21350	NP_000782	NP_001006584	XP_002942406	NP_571850
A21353	NP_004159	XP_419054	NP_001015989	NP_957204
A21370	NP_005434	XP_420493	NP_001006743	NP_001122171
A21377	NP_001534	XP_414592	NP_001011159	XP_002664339
A21388	NP_002243	XP_426211	XP_002934533	NP_001122196
A21401	NP_001129492	XP_418682	NP_001016862	NP_001002730
A21402	NP_060497	XP_003640382	XP_002935289	NP_001122007
A21416	NP_000202	NP_990582	XP_002936570	XP_686012
A21454	NP_061170	XP_424421	NP_001039245	NP_998693
A21556	NP_849161	XP_001233729	XP_002935525	XP_003197743
A21653	NP_056300	XP_422323	NP_001017275	NP_957050
A21685	NP_859057	NP_001177825	NP_001037943	NP_956746
A21759	NP_002018	XP_424881	NP_001116893	NP_001074029
A21796	NP_064630	XP_419697	NP_001107316	NP_001038303
A21859	NP_001159765	NP_001038121	XP_002931745	NP_957129
A21873	NP_077285	NP_001026337	XP_002941000	XP_692717
A21897	NP_001127839	NP_001025771	XP_002938268	NP_001032750
A21901	NP_005365	XP_003642866	NP_001096176	NP_001002223
A21915	NP_660158	XP_419958	NP_001072555	NP_956912
A21943	NP_005111	XP_003641146	XP_002934949	NP_001034550
A21945	NP_000157	NP_989702	NP_001001240	XP_001921623
A21988	NP_001001438	NP_001006514	NP_001073038	NP_001077036
A21989	NP_003897	XP_421891	XP_002932075	XP_689234
A22009	NP_056655	XP_001232162	XP_002943575	NP_571671
A22010	NP_000739	NP_990144	NP_001093684	XP_003200231
A22020	NP_055928	XP_415744	XP_002932335	XP_001922332
A22030	NP_612452	NP_001025796	NP_001106440	NP_001243178
A22058	NP_001245301	XP_420103	XP_002939623	XP_001920588
A22072	NP_061821	XP_417525	NP_001135519	NP_001077039
A22086	NP_055178	XP_417138	XP_002940013	XP_003200093
A22118	NP_078894	XP_003642640	XP_002935062	XP_685481
A22121	NP_005179	NP_989539	NP_001122110	NP_001007331
A22127	NP_057230	NP_001006320	NP_001136377	NP_957058
A22136	NP_055448	XP_420968	NP_001005076	NP_001077052
A22229	NP_570138	NP_001244256	NP_001008092	NP_001070775
A22392	NP_002608	NP_001185583	XP_002936605	NP_001005994
A22400	NP_061982	XP_414707	NP_001025606	NP_956161
A22401	NP_958802	NP_001025798	XP_002938331	NP_001006058
A22406	NP_001073951	XP_425350	XP_002940775	XP_697413
A22453	NP_001261	NP_990272	XP_002933489	NP_001121770
A22471	NP_001009923	NP_001007878	NP_001005085	NP_001004006
A22500	NP_060255	XP_414505	NP_001123745	NP_001098412
A22513	NP_001375	NP_001006538	XP_002931628	NP_001082866
A22531	NP_001821	XP_425575	NP_001120070	NP_001070786
A22569	NP_699199	XP_418567	NP_989084	XP_001336026
A22688	NP_115970	NP_001026154	NP_001072757	NP_991193
A22696	NP_001721	XP_417013	XP_002931975	XP_001344916
A22724	NP_115613	NP_001026303	XP_002934041	NP_001007415
A22844	NP_001001665	XP_422077	NP_001011341	NP_001106808
A22880	NP_001017372	XP_001233248	NP_001011348	XP_003199367
A22939	NP_071904	NP_001012965	XP_002938006	NP_997839
A22942	NP_001123645	NP_990637	XP_002935855	NP_571341
A22945	NP_001245211	XP_429198	XP_002934017	XP_002664500
A23004	NP_002227	XP_426210	NP_001096396	XP_002664235
A23006	NP_003212	NP_990226	NP_001039109	NP_001019836
A23101	NP_055945	XP_001232386	NP_001131090	XP_692034
A23155	NP_004256	NP_001153900	NP_001120262	NP_571720
A23192	NP_001015882	XP_003643130	NP_001011497	NP_001191956
A23214	NP_060700	XP_419576	XP_002932582	NP_998696
A23242	NP_055458	XP_419095	NP_001090719	NP_001153141
A23329	NP_060673	XP_417963	NP_001072317	XP_001334194
A23396	NP_057442	NP_001001744	XP_002941818	NP_991261
A23434	NP_001186209	XP_425137	XP_002936057	NP_775327
A23493	NP_001029102	NP_990406	NP_001005123	NP_001032190
A23511	NP_001171469	NP_989805	NP_989302	NP_878297
A23517	NP_002563	NP_001026082	XP_002932955	NP_001076320
A23531	NP_002475	NP_001185570	NP_001015835	NP_001017538
A23557	NP_006523	NP_001012865	XP_002940254	NP_956001
A23721	NP_036567	XP_001233682	XP_002939812	NP_001038438
A23766	NP_056382	XP_003640596	XP_002940152	XP_002660379
A23789	NP_055692	XP_003642394	NP_001120596	NP_998431
A23812	NP_653319	XP_416545	NP_001121472	NP_001008636
A23826	NP_055572	XP_414607	XP_002941844	XP_695719
A23827	NP_001019820	NP_001025791	NP_001005668	NP_998613
A23837	NP_689958	XP_418683	NP_001120374	NP_001002733
A23854	NP_001119812	NP_001025881	NP_001096448	NP_001159919
A23857	NP_001258211	NP_001035555	NP_001123390	NP_001154925
A23878	NP_598000	XP_419879	XP_002937194	XP_697512
A23881	NP_612450	XP_419881	XP_002937200	XP_685111
A23964	NP_000344	XP_414240	NP_001006790	NP_001071022
A23982	NP_000785	NP_001138320	XP_002942580	NP_001129448
A23999	NP_277050	XP_419743	NP_001072336	XP_001343601
A24019	NP_543148	XP_424529	XP_002933002	XP_001342230
A24025	NP_001075019	XP_420332	XP_002931869	NP_001003847
A24031	NP_115553	NP_001006575	XP_002931759	NP_001003995
A24044	NP_003736	NP_001131120	NP_001011327	NP_001003467
A24065	NP_060831	XP_419916	NP_001015964	NP_001070213
A24109	NP_001036038	XP_427660	XP_002932564	NP_001074047
A24118	NP_071351	XP_419138	XP_002937522	XP_003198010
A24122	NP_001127847	XP_003641566	NP_001128285	XP_685772
A24133	NP_005253	XP_414848	XP_002935903	NP_001082855
A24179	NP_689479	XP_414132	NP_001016122	NP_001082992
A24248	NP_055907	XP_414907	XP_002932267	NP_001073513
A24260	NP_001245348	XP_426419	XP_002938986	NP_001018583
A24328	NP_005914	XP_419725	XP_002936311	NP_001155222
A24343	NP_057136	XP_419413	XP_002936070	NP_956056
A24347	NP_443142	XP_416993	NP_001096395	XP_687093
A24349	NP_003731	XP_419478	XP_002942651	NP_001032478
A24457	NP_666018	XP_416173	NP_988910	NP_001030141
A24481	NP_066010	XP_427467	XP_002936381	XP_691248
A24491	NP_001073919	XP_003641058	XP_002937205	NP_001139063
A24527	NP_060128	XP_421484	XP_002940582	XP_002667719
A24532	NP_003349	XP_424914	NP_001016133	NP_001019378
A24556	NP_001012301	XP_425212	XP_002940132	XP_002664306
A24605	NP_073572	NP_001026214	NP_001096198	NP_001082856
A24614	NP_055679	NP_001026439	NP_989211	NP_001038283
A24623	NP_003947	XP_421660	XP_002935478	NP_001008652
A24626	NP_998771	XP_421663	NP_989310	NP_001139286
A24660	NP_004415	XP_414860	NP_001072166	NP_001020684
A24661	NP_001035830	NP_001025809	XP_002932481	NP_997891
A24712	NP_005724	NP_001012801	XP_002936881	NP_001154942
A24758	NP_055277	XP_424387	NP_001011191	NP_001003551
A24825	NP_002019	XP_003643828	NP_001017258	NP_001002128
A24835	NP_115605	XP_003640598	XP_002931977	XP_003197659
A24838	NP_001517	NP_001019755	XP_002934896	NP_001073337
A24839	NP_071447	XP_428202	XP_002938532	NP_001038442
A24851	NP_066569	NP_001029994	NP_001012289	NP_001012254
A24860	NP_060873	XP_001233131	XP_002943538	NP_878313
A24878	NP_002797	NP_001006494	NP_989342	NP_001003832
A24884	NP_057301	XP_419714	NP_001090826	NP_001038591
A24890	NP_001231878	XP_421757	NP_001072564	XP_002664023
A24896	NP_057117	XP_418323	NP_001011297	NP_001098576
A24956	NP_689854	XP_416046	XP_002932851	NP_001071231
A24963	NP_005277	XP_003642533	XP_002943437	NP_001025429
A25020	NP_008846	NP_001008680	XP_002937023	NP_998611
A25024	NP_004990	NP_990066	XP_002936250	NP_001004110
A25037	NP_055547	XP_001235240	NP_001096454	NP_001002193
A25062	NP_003180	NP_990683	NP_001135468	NP_998402
A25067	NP_000362	NP_990666	NP_001096539	NP_001005598
A25110	NP_061130	XP_420024	NP_001016571	NP_001073523
A25166	NP_001161829	NP_990300	NP_001017267	NP_998354
A25175	NP_004981	NP_001244301	NP_001017000	NP_956370
A25195	NP_004811	XP_418276	NP_001120511	XP_699028
A25196	NP_689627	NP_989834	NP_001072933	NP_957249
A25283	NP_116162	XP_422732	XP_002935197	XP_003200463
A25286	NP_001129579	XP_426622	XP_002933831	NP_001189382
A25349	NP_653320	XP_001232698	XP_002939358	XP_001918641
A25399	NP_005756	NP_001025972	NP_001011319	NP_998188
A25440	NP_478144	XP_421339	XP_002933259	XP_696336
A25441	NP_065147	XP_421338	XP_002933278	XP_003200454
A25444	NP_001137436	XP_418942	NP_001016332	NP_957071
A25447	NP_689996	XP_422664	XP_002936654	NP_001074066
A25479	NP_776194	XP_001234366	XP_002941495	NP_001025361
A25481	NP_037428	XP_422185	XP_002932195	NP_956732
A25488	NP_542173	NP_989835	XP_002944506	NP_001025304
A25585	NP_076991	NP_001026773	NP_001123689	NP_001003611
A25602	NP_000881	XP_417864	NP_001016901	XP_700619
A25683	NP_005418	XP_417545	XP_002933901	NP_899183
A25693	NP_955400	NP_001034406	NP_001120170	NP_571644
A25698	NP_001245324	XP_418092	NP_001034822	NP_001002753
A25704	NP_001185	XP_003642915	XP_002939815	XP_685414
A25705	NP_005026	XP_418204	XP_002939816	XP_685138
A25706	NP_919442	NP_001006338	NP_001006735	NP_001076486
A25754	NP_001073927	XP_001234658	XP_002935724	NP_571307
A25768	NP_001243764	NP_001025952	NP_001016891	NP_001112368
A25788	NP_060351	XP_424839	NP_001096547	NP_001013467
A25873	NP_002228	XP_417510	NP_001096675	NP_001103880
A25900	NP_000013	NP_001006290	NP_001011025	NP_001002646
A25930	NP_001137314	XP_423850	NP_001016848	NP_001070764
A25947	NP_001123514	NP_001073231	NP_001005689	NP_001093446
A25965	NP_849144	XP_422837	XP_002941152	XP_002664562
A25993	NP_003255	NP_989609	XP_002933537	NP_997977
A26012	NP_001119807	NP_001186062	NP_001072500	XP_695500
A26107	NP_067017	XP_419437	NP_001007940	NP_957173
A26109	NP_001158160	XP_419438	XP_002934741	NP_001074100
A26111	NP_002244	NP_001004368	XP_002934715	NP_001019824
A26121	NP_006205	XP_424238	XP_002935288	NP_001017823
A26217	NP_000901	NP_001026299	XP_002933531	XP_001332759
A26234	NP_001129676	XP_417522	XP_002942173	NP_998341
A26241	NP_005916	XP_419181	NP_001096352	XP_003197854
A26266	NP_001124435	XP_001232567	NP_001034832	XP_683418
A26269	NP_055721	XP_415871	XP_002934392	NP_001018354
A26304	NP_115904	NP_990037	XP_002936655	NP_001003612
A26327	NP_004845	NP_001025514	XP_002943107	NP_001003779
A26336	NP_071911	NP_001026766	NP_001017355	NP_991164
A26346	NP_066023	XP_420832	NP_001072498	NP_001071191
A26430	NP_006630	XP_426249	XP_002937106	NP_001018484
A26440	NP_055714	XP_429123	XP_002933487	XP_691270
A26456	NP_063944	XP_419554	NP_001090843	NP_001070106
A26457	NP_003263	NP_001026233	NP_001017021	XP_001341229
A26478	NP_001002800	NP_989849	XP_002933283	NP_775360
A26529	NP_002035	NP_001025728	NP_001005803	NP_001007433
A26559	NP_002588	XP_426634	XP_002933816	XP_682823
A26581	NP_006080	XP_416812	NP_001072602	XP_003199550
A26597	NP_079052	NP_001244188	XP_002937528	XP_001921602
A26627	NP_079221	NP_001026783	NP_001016296	NP_956474
A26633	NP_056167	NP_989758	NP_001004774	NP_991281
A26658	NP_001018125	NP_001034350	XP_002934277	NP_958498
A26678	NP_008872	NP_990123	NP_001093691	NP_571950
A26766	NP_065823	XP_415828	XP_002938263	XP_002664688
A26768	NP_065842	XP_415829	NP_001116260	XP_001343838
A26771	NP_653181	XP_003643962	XP_002945116	NP_001004580
A26772	NP_056142	XP_423228	NP_001072622	NP_001020094
A26793	NP_000375	NP_001038098	XP_002934538	XP_694827
A26862	NP_001229510	XP_419317	NP_001116964	XP_001345314
A26864	NP_001018049	XP_003640378	XP_002931917	XP_683042
A26903	NP_071324	XP_428110	NP_001016530	XP_003200482
A26945	NP_078849	XP_419676	NP_001004883	NP_001014353
A26958	NP_001121691	NP_001025764	NP_001072615	NP_998440
A26967	NP_653317	NP_001006353	NP_001096533	NP_001003589
A27011	NP_001750	NP_989544	XP_002940348	NP_001082914
A27019	NP_955469	XP_003642634	NP_001135541	XP_003200534
A27040	NP_001270	NP_001182052	NP_001007987	XP_003201313
A27058	NP_073751	XP_419143	XP_002938955	XP_689178
A27064	NP_115800	XP_417171	NP_001004822	XP_699175
A27102	NP_003913	XP_413753	XP_002934599	XP_698091
A27141	NP_005363	NP_001026687	XP_002934162	NP_991143
A27155	NP_061944	NP_001025904	NP_001008672	NP_957231
A27163	NP_005150	NP_001072949	NP_989094	NP_001002066
A27167	NP_001123608	NP_001038132	NP_001120371	NP_001013541
A27194	NP_001127951	XP_422352	NP_001120353	NP_001070848
A27205	NP_003000	NP_001159799	NP_001165152	NP_840072
A27214	NP_001139120	XP_003641914	XP_002933009	XP_002665395
A27231	NP_542782	XP_003642470	XP_002933874	XP_002661979
A27263	NP_001107829	XP_420672	XP_002934310	NP_001038879
A27294	NP_001121369	XP_001234248	XP_002935418	NP_001233589
A27335	NP_005743	XP_423644	XP_002935100	XP_002667611
A27347	NP_570123	XP_429179	NP_001123726	XP_003199439
A27353	NP_060064	XP_423026	XP_002937072	XP_689432
A27442	NP_066958	XP_419611	XP_002942396	XP_699952
A27483	NP_001122108	XP_414771	XP_002938886	XP_001919039
A27494	NP_001708	XP_425076	XP_002940144	XP_697231
A27495	NP_003018	NP_989859	XP_002940145	NP_001075160
A27514	NP_001188294	XP_003642144	XP_002939580	NP_001002087
A27529	NP_037441	XP_003641899	NP_001096181	NP_956937
A27536	NP_710162	XP_003643057	XP_002935020	NP_001017726
A27645	NP_001121367	XP_001232499	NP_001072529	XP_001335085
A27658	NP_004088	XP_001232151	NP_001005459	NP_937787
A27676	NP_085046	XP_417299	XP_002931918	XP_001331201
A27704	NP_057225	NP_001161209	NP_001072301	NP_001095898
A27728	NP_001035869	XP_001232760	XP_002934011	XP_696813
A27730	NP_872580	XP_003641697	XP_002933982	NP_001018551
A27744	NP_689945	XP_419496	NP_001005021	NP_001025284
A27757	NP_036460	NP_001025906	NP_001116196	NP_001020355
A27764	NP_065170	XP_423207	NP_001135655	NP_001073514
A27802	NP_659491	XP_415591	NP_001106545	NP_001018475
A27822	NP_056291	XP_424497	NP_001016890	NP_001002208
A27861	NP_078907	NP_001103256	NP_001190185	XP_001339732
A27941	NP_037413	XP_426107	NP_001116922	NP_001243575
A27969	NP_005438	XP_425446	XP_002937109	XP_001922355
A27973	NP_004647	NP_001025761	NP_001008206	NP_001157309
A28034	NP_115590	XP_003642494	XP_002939613	NP_001107907
A28070	NP_004453	NP_001034383	NP_001135642	NP_001189454
A28154	NP_066292	XP_425235	XP_002931566	XP_697604
A28187	NP_000592	NP_001025541	XP_002933142	NP_001013292
A28194	NP_065874	XP_419698	NP_001039119	NP_001038305
A28210	NP_001076437	NP_001257896	XP_002935884	XP_003198249
A28232	NP_054730	NP_001120786	NP_001016844	NP_001107269
A28242	NP_071375	XP_414833	XP_002935905	NP_001103572
A28264	NP_001070666	NP_001029993	XP_002933994	NP_001076500
A28286	NP_620143	XP_417866	NP_001011108	NP_991240
A28327	NP_001017973	NP_001006155	NP_001007975	NP_001007286
A28452	NP_003147	NP_001026009	NP_991397	NP_001038264
A28503	NP_036596	NP_990034	XP_002934799	NP_571085
A28506	NP_001014980	XP_417583	NP_001016365	NP_001073547
A28510	NP_085152	XP_417581	NP_001106491	NP_001076484
A28528	NP_064577	XP_003640777	NP_001037945	NP_998307
A28544	NP_061927	XP_421498	XP_002934757	NP_001139105
A28545	NP_114118	XP_421499	XP_002941809	XP_001338475
A28574	NP_115558	NP_001026412	NP_001192104	XP_003200403
A28584	NP_004516	XP_422014	XP_002936802	NP_001181916
A28642	NP_055799	XP_420077	NP_001039176	XP_003199688
A28645	NP_001243711	XP_001234088	XP_002933653	XP_001343014
A28684	NP_056017	XP_003642159	XP_002938330	XP_003201410
A28794	NP_149074	XP_001235897	NP_001072894	NP_001002115
A28856	NP_079184	XP_423870	XP_002932998	NP_001185496
A28932	NP_001107654	NP_001025909	NP_001116877	NP_956457
A28943	NP_060780	XP_003643371	NP_001096549	NP_001003536
A28960	NP_005413	NP_990204	XP_002935069	XP_689855
A29033	NP_071337	XP_001235376	XP_002933246	NP_001103587
A29034	NP_001008744	XP_421313	NP_001039242	XP_700174
A29041	NP_000063	NP_001025902	NP_001107151	NP_001002363
A29043	NP_060616	XP_415864	NP_001016220	NP_001017695
A29045	NP_056536	NP_001012628	XP_002934387	NP_001018154
A29047	NP_000975	XP_415820	NP_001005109	NP_001001593
A29049	NP_835464	XP_415822	NP_001006906	NP_620776
A29051	NP_004286	XP_003642477	NP_001005074	NP_991325
A29063	NP_060158	XP_415546	XP_002940779	XP_687804
A29067	NP_078945	XP_003642992	NP_001072865	XP_001345419
A29117	NP_775779	XP_419560	XP_002935861	XP_002664257
A29186	NP_057641	XP_003640769	XP_002937785	XP_001342791
A29248	NP_113672	XP_003641533	XP_002936480	NP_001189346
A29250	NP_612422	XP_001233352	XP_002939706	NP_998035
A29282	NP_001077861	NP_001025838	NP_001017261	NP_001002147
A29291	NP_004429	NP_990112	NP_001135575	NP_001005919
A29303	NP_001014794	NP_989525	NP_001120512	NP_956865
A29325	NP_079348	XP_415498	XP_002935550	NP_956574
A29326	NP_077017	NP_001183963	XP_002935549	XP_002667713
A29333	NP_001193	NP_990568	NP_001017034	NP_571417
A29340	NP_775873	XP_424482	XP_002933754	NP_998128
A29419	NP_001350	XP_418328	NP_001076813	NP_001002444
A29447	NP_036314	XP_003641864	NP_001107970	NP_571360
A29449	NP_004321	XP_413765	NP_001015933	NP_957512
A29453	NP_036384	NP_001006229	XP_002935013	NP_001025276
A29455	NP_612508	XP_421830	XP_002937844	XP_001920864
A29477	NP_000797	NP_989649	XP_002941682	NP_001070794
A29505	NP_919260	XP_426312	XP_002935517	XP_696013
A29511	NP_660159	XP_419733	XP_002935853	NP_956832
A29546	NP_001240	XP_421258	NP_001186531	XP_684862
A29547	NP_079333	XP_421259	XP_002938641	NP_001119891
A29622	NP_149091	NP_001001759	XP_002933948	NP_001005402
A29634	NP_079001	XP_423807	XP_002935613	NP_956116
A29712	NP_870987	XP_003643035	NP_001093726	NP_571027
A29783	NP_066191	XP_426584	XP_002936792	XP_699646
A29815	NP_004604	NP_990779	NP_001123852	NP_997821
A29910	NP_940912	XP_428421	XP_002939640	XP_693697
A29955	NP_078920	NP_001026367	XP_002933911	NP_001082857
A30055	NP_171608	XP_003641955	XP_002937219	XP_003200493
A30106	NP_001127694	NP_001025507	NP_001008113	NP_957351
A30121	NP_078853	XP_424256	XP_002939154	XP_002664477
A30153	NP_001183955	XP_418736	XP_002932833	NP_001007375
A30294	NP_001245245	XP_422790	NP_001106617	NP_001003883
A30347	NP_775866	NP_001012957	NP_001106506	NP_001018164
A30357	NP_000351	NP_990136	XP_002938944	NP_571224
A30422	NP_660156	XP_003642923	NP_001072780	NP_001119893
A30469	NP_065945	XP_420845	NP_001107306	XP_698272
A30470	NP_001005473	XP_003642980	XP_002940165	NP_001014322
A30562	NP_055950	XP_416176	NP_001135596	NP_001003859
A30602	NP_001454	NP_990103	NP_001005438	NP_571018
A30624	NP_001972	NP_001026454	NP_001120100	XP_002663145
A30634	NP_775799	XP_413847	NP_001120035	NP_001017774
A30644	NP_000399	XP_422168	NP_001107700	NP_001038813
A30683	NP_073607	XP_413991	NP_001016123	NP_001002874
A30732	NP_001073887	XP_417786	NP_001106458	NP_001038179
A30825	NP_075571	XP_422752	XP_002935183	XP_698873
A30826	NP_003732	NP_990311	NP_001136129	NP_571048
A30862	NP_000940	NP_990185	XP_002940001	NP_001122149
A30887	NP_699178	XP_426403	NP_001107502	NP_001013530
A30892	NP_001095841	XP_001234652	NP_001120398	NP_001070128
A31014	NP_002524	NP_001073044	NP_001096509	NP_998649
A31016	NP_055991	XP_419393	NP_001096500	XP_684144
A31017	NP_001026855	XP_419394	NP_001016036	NP_999979
A31062	NP_002795	NP_001026361	NP_001006786	NP_001002064
A31185	NP_001107607	XP_003643518	NP_001015862	NP_001188338
A31220	NP_001092264	XP_003640664	XP_002942600	NP_001124329
A31306	NP_002849	NP_001012615	XP_002933838	NP_998647
A31360	NP_065116	XP_421751	NP_001120629	NP_998145
A31450	NP_001164977	NP_001006400	NP_001011062	NP_001005939
A31466	NP_079330	NP_001012966	XP_002935366	XP_699171
A31555	NP_000244	NP_001103254	XP_002934813	NP_998135
A31561	NP_001128137	XP_001234301	NP_001008012	XP_688707
A31642	NP_001040	NP_001106638	XP_002935392	XP_696666
A31648	NP_005369	NP_001026262	NP_001006874	NP_997779
A31677	NP_001073904	XP_413835	XP_002939667	XP_001334115
A31728	NP_694545	NP_001012959	NP_001005044	XP_002662125
A31744	NP_078812	XP_001232317	XP_002942593	XP_002663375
A31839	NP_056082	XP_415167	NP_001128286	XP_693902
A31867	NP_110404	XP_417383	NP_001072926	NP_001104633
A31877	NP_003336	NP_989596	NP_001016408	NP_571908
A32001	NP_116218	XP_001231228	NP_001072586	NP_001119926
A32035	NP_004611	XP_421089	NP_001008162	NP_001038217
A32036	NP_001153639	XP_003641431	XP_002937333	XP_685820
A32122	NP_003100	NP_989935	NP_989139	NP_997827
A32210	NP_071905	XP_419977	NP_001096382	NP_001243150
A32222	NP_067047	XP_429174	XP_002934034	XP_002665876
A32331	NP_000667	NP_990418	XP_002938969	NP_001034902
A32357	NP_009180	XP_003640604	XP_002931986	NP_001103335
A32362	NP_059134	NP_001025965	NP_001017105	NP_001039027
A32438	NP_653202	NP_001001778	NP_001106448	NP_001003468
A32466	NP_000430	XP_003643108	XP_002933476	NP_001131134
A32485	NP_057285	XP_422675	XP_002935132	NP_001073646
A32487	NP_001137475	XP_420364	XP_002933595	XP_001332767
A32488	NP_001171678	XP_420266	XP_002933596	XP_686401
A32491	NP_005625	NP_989526	NP_001007502	NP_001001811
A32498	NP_003092	XP_422267	NP_001120236	NP_001116744
A32507	NP_000052	NP_989564	NP_001123732	XP_697087
A32515	NP_005537	XP_414568	XP_002939656	NP_571179
A32531	NP_777572	XP_003641180	XP_002940451	NP_001002700
A32557	NP_060232	XP_003641923	NP_001123828	NP_001071065
A32583	NP_998767	XP_001233766	XP_002936556	NP_001095865
A32602	NP_055817	XP_425297	NP_001120516	XP_696130
A32611	NP_005797	NP_001026697	XP_002938491	NP_835201
A32713	NP_003856	NP_990343	NP_001016712	NP_571424
A32714	NP_060033	NP_989846	XP_002940076	NP_705946
A32724	NP_000187	XP_003641938	XP_002937366	NP_997885
A32764	NP_000548	NP_989669	NP_001128589	XP_002662587
A33010	NP_000629	NP_990392	NP_001184007	NP_001018508
A33011	NP_055892	XP_415814	XP_002937189	NP_001124068
A33062	NP_076999	XP_418464	NP_001004834	NP_001004611
A33125	NP_079472	NP_001006458	NP_001016179	NP_001032461
A33158	NP_003915	XP_001234151	NP_001116492	NP_001014818
A33173	NP_060656	XP_422243	NP_001120506	NP_001018495
A33174	NP_000424	XP_422288	NP_001029119	NP_001103932
A33190	NP_001137296	NP_001186478	NP_001120169	NP_001005944
A33207	NP_689964	XP_417230	XP_002935297	XP_689199
A33210	NP_060142	NP_001171026	XP_002939674	NP_001025232
A33217	NP_705835	XP_001231574	XP_002936755	XP_001920126
A33288	NP_795361	XP_003642937	NP_001016306	NP_001038792
A33290	NP_001139255	NP_001243435	XP_002936374	NP_001091717
A33327	NP_003809	XP_417669	NP_001119975	NP_957480
A33388	NP_068813	XP_417872	NP_001005075	NP_001035441
A33447	NP_003137	NP_001005796	NP_001184126	XP_001923156
A33458	NP_116764	NP_001161173	XP_002941266	NP_001036160
A33466	NP_001128144	XP_421785	XP_002940389	NP_001002536
A33485	NP_001186	NP_990482	XP_002931790	XP_688502
A33575	NP_001599	NP_001006511	NP_001039250	NP_957475
A33608	NP_061146	XP_417078	XP_002936776	XP_001337990
A33670	NP_060556	XP_426585	XP_002933319	NP_001018411
A33697	NP_001171869	XP_001231783	XP_002944359	NP_001003591
A33701	NP_036320	XP_425185	NP_988949	NP_944600
A33702	NP_001116697	XP_001231764	XP_002939573	NP_001129458
A33766	NP_056137	NP_001025724	NP_001238770	XP_695502
A33796	NP_004434	XP_422762	XP_002935194	XP_683712
A33800	NP_001007794	NP_001006506	NP_001007498	NP_991272
A33805	NP_003829	NP_001191744	NP_001191751	NP_001018590
A33875	NP_054758	XP_417195	NP_001016346	NP_997781
A33880	NP_055836	XP_419852	XP_002933975	NP_001025383
A33882	NP_000856	XP_001235179	XP_002933964	XP_002665689
A33887	NP_001254772	NP_989505	NP_001122127	NP_571032
A33965	NP_001008221	XP_003642103	NP_001007496	NP_001186247
A34031	NP_003259	NP_001019757	XP_002940742	NP_001124067
A34074	NP_945350	NP_001072945	XP_002933151	NP_958881
A34079	NP_001116310	NP_001025901	XP_002933136	NP_001074082
A34093	NP_932347	XP_426184	XP_002937206	XP_001332433
A34104	NP_077296	XP_003642846	XP_002938069	NP_001003478
A34164	NP_919278	XP_422054	NP_001116962	XP_002663368
A34168	NP_006705	XP_001235757	NP_001025618	NP_001014360
A34197	NP_002720	NP_990583	NP_989420	NP_571009
A34249	NP_005099	XP_418537	XP_002932537	NP_956673
A34420	NP_001070	XP_418206	NP_001006825	NP_001018425
A34481	NP_001139737	XP_003640402	NP_001072290	NP_571574
A34492	NP_060334	NP_001035318	NP_001090873	NP_001018592
A34549	NP_001354	NP_001026286	XP_002939254	NP_001028279
A34562	NP_001028222	XP_416303	XP_002942246	NP_001038293
A34607	NP_003197	XP_419734	NP_001103518	NP_001032770
A34627	NP_004089	XP_421783	NP_001128284	NP_571355
A34633	NP_775788	NP_001001328	NP_001016769	NP_001018524
A34634	NP_000172	NP_001034405	XP_002935849	XP_003198617
A34679	NP_056021	NP_001007828	XP_002933010	XP_002667438
A34731	NP_036520	NP_001007826	NP_001016502	NP_001074166
A34732	NP_001258142	XP_413825	NP_001015687	NP_001017881
A34772	NP_000553	XP_426667	NP_001005445	NP_001003496
A34803	NP_001073935	XP_425385	NP_001008447	XP_692123
A34809	NP_001153698	NP_001033741	XP_002940958	NP_997985
A34837	NP_004696	XP_425679	NP_989053	NP_001002680
A34922	NP_695003	XP_003641861	NP_001016368	NP_001116327
A35032	NP_004932	XP_418105	XP_002932570	XP_002663993
A35081	NP_001166114	NP_001026631	NP_001016888	NP_001002743
A35094	NP_037469	XP_415839	NP_001011397	XP_003198763
A35102	NP_001073975	XP_420558	XP_002936503	XP_001342667
A35107	NP_000040	XP_415853	NP_001039114	NP_001103573
A35171	NP_006726	NP_990481	XP_002938065	NP_571181
A35190	NP_002552	NP_990079	XP_002938288	NP_919394
A35329	NP_002154	NP_990747	XP_002934991	NP_001002622
A35339	NP_110388	NP_990114	NP_001239015	NP_001035477
A35358	NP_065868	XP_416572	XP_002939696	NP_001009986
A35434	NP_060241	XP_414403	XP_002935094	NP_001076277
A35435	NP_000916	NP_001185549	NP_001016212	NP_998319
A35495	NP_037408	XP_415852	NP_001120078	XP_001341627
A35548	NP_001073945	XP_001233963	XP_002933496	XP_002664501
A35582	NP_055723	XP_003642334	XP_002935551	NP_001103954
A35633	NP_689936	XP_424044	XP_002939757	NP_001108038
A35655	NP_004427	NP_001007966	NP_998845	NP_001243660
A35731	NP_001007272	XP_003641583	XP_002937175	NP_001139098
A35839	NP_065690	XP_416738	XP_002941332	NP_998243
A35928	NP_001039	NP_990667	NP_001090807	NP_898893
A35934	NP_065711	NP_989913	XP_002932880	NP_919401
A36112	NP_115536	XP_419114	XP_002939660	XP_696502
A36252	NP_061063	XP_419783	XP_002936982	NP_001073497
A36257	NP_068756	XP_003642041	XP_002933127	NP_001032513
A36299	NP_005903	NP_001026685	XP_002934451	NP_775385
A36321	NP_006572	NP_001072970	NP_001015689	NP_001122265
A36388	NP_001035519	XP_417021	XP_002936970	NP_001154294
A36405	NP_000070	NP_990147	XP_002934647	NP_571520
A36413	NP_077302	XP_426506	NP_001011123	NP_998107
A36554	NP_065850	XP_003641564	NP_989010	XP_699129
A36637	NP_149977	NP_001026743	NP_001072170	NP_001122236
A36640	NP_002460	NP_001025917	NP_001017160	NP_001003982
A36954	NP_003146	XP_425760	XP_002932600	NP_001038922
A37086	NP_620714	XP_003641384	XP_002934116	NP_001071190
A37113	NP_001138462	XP_426345	XP_002938691	XP_690801
A37118	NP_004795	XP_423992	NP_001016887	NP_956441
A37132	NP_849155	XP_426332	NP_001093729	XP_699710
A37134	NP_002183	NP_990727	XP_002933452	NP_001018166
A37150	NP_116195	NP_001012294	NP_001011203	NP_001012384
A37181	NP_004985	NP_989998	XP_002932554	NP_998288
A37204	NP_542388	XP_426208	XP_002935073	NP_001020727
A37266	NP_057085	XP_003642362	NP_001016635	NP_001070232
A37310	NP_001014831	XP_001233796	NP_001090671	NP_001002222
A37494	NP_620144	XP_417932	NP_001011085	NP_001008629
A37497	NP_005451	XP_424409	NP_001005712	NP_001107108
A37511	NP_001968	XP_426327	XP_002934295	NP_001186660
A37547	NP_000476	XP_003641980	NP_001007941	NP_956962
A37560	NP_056030	XP_417530	XP_002933905	XP_001919742
A37601	NP_660151	XP_414167	XP_002934995	NP_001032779
A37613	NP_061183	XP_419410	XP_002936066	NP_001121706
A37622	NP_004382	NP_001005571	XP_002939351	NP_001003736
A37656	NP_065921	XP_420402	NP_001015973	NP_001038952
A37669	NP_115958	NP_001006572	NP_001025665	NP_001007772
A37670	NP_116319	XP_417180	NP_001011429	NP_001070813
A37715	NP_000029	XP_001233411	XP_002936457	NP_001137312
A37729	NP_005474	NP_001073220	XP_002934050	NP_001038478
A37730	NP_003016	NP_989860	NP_989126	NP_958905
A37735	NP_733793	XP_426625	XP_002937406	XP_001332688
A37786	NP_001873	XP_003643006	XP_002940913	NP_001003459
A37787	NP_570128	XP_429152	XP_002940915	NP_001019562
A37840	NP_001019572	XP_424086	NP_001096424	XP_688256
A37857	NP_001004127	NP_001186754	NP_989283	NP_001154823
A37861	NP_758857	XP_425129	XP_002934997	NP_001103499
A37896	NP_775831	XP_419769	XP_002938344	XP_684953
A37945	NP_079239	NP_001012804	XP_002931545	NP_001025416
A37947	NP_001073964	XP_001233346	XP_002931539	XP_002661260
A37982	NP_006428	NP_001164635	NP_001123856	XP_001921910
A38027	NP_001094288	NP_001171615	XP_002933387	NP_001013522
A38075	NP_005550	NP_001186735	XP_002938099	NP_001030158
A38090	NP_003968	NP_989800	NP_001096219	XP_001922877
A38118	NP_001072	XP_001235156	XP_002939051	XP_002666724
A38135	NP_001010923	XP_001232459	XP_002940439	XP_683025
A38163	NP_001073969	XP_426552	XP_002932063	NP_001122036
A38172	NP_001015	XP_417405	NP_001005126	NP_957485
A38176	NP_004854	NP_001006483	XP_002938915	NP_001018455
A38212	NP_443106	NP_990405	NP_001096346	NP_571598
A38251	NP_003071	XP_001232516	NP_001120209	XP_001338369
A38356	NP_005279	XP_425637	XP_002941580	XP_693970
A38419	NP_001167637	XP_415687	XP_002940676	XP_690266
A38528	NP_001229628	XP_421780	NP_001119992	NP_001071015
A38543	NP_004038	XP_003641751	NP_001017064	NP_955855
A38579	NP_001789	NP_001186786	NP_001008136	NP_998571
A38582	NP_001138578	XP_425335	NP_001072519	XP_001922345
A38601	NP_003202	NP_990081	NP_001004982	NP_001018587
A38638	NP_115873	XP_418150	XP_002942362	NP_001082827
A38639	NP_001136402	NP_001006474	XP_002937342	NP_955834
A38686	NP_078997	XP_425925	XP_002939633	XP_684360
A38701	NP_038471	XP_423028	NP_001165302	XP_695277
A38751	NP_000825	XP_416204	XP_002932208	XP_003198060
A38797	NP_078850	XP_420627	NP_001116272	XP_689934
A38802	NP_079216	XP_417678	XP_002932629	NP_001103482
A38879	NP_004393	NP_989616	NP_001120636	NP_919385
A38883	NP_996801	XP_421364	XP_002936627	NP_001156838
A38935	NP_659416	XP_420372	XP_002933097	NP_001073493
A39072	NP_003309	XP_419867	NP_001072599	NP_778207
A39272	NP_077278	XP_415771	XP_002933877	XP_001337581
A39273	NP_056969	XP_417214	NP_001123416	NP_001007308
A39438	NP_000057	XP_422502	XP_002931633	NP_001243652
A39440	NP_000156	NP_989917	NP_988856	NP_571113
A39443	NP_000246	XP_420055	XP_002933609	NP_001092696
A39445	NP_000292	XP_419618	XP_002938616	NP_958880
A39446	NP_000305	XP_421555	NP_001116943	NP_001001822
A39450	NP_000689	XP_003641560	XP_002936018	XP_695587
A39452	NP_000903	XP_426087	XP_002934159	NP_878306
A39453	NP_001001412	XP_426534	XP_002936848	XP_001344294
A39455	NP_000777	NP_001041542	NP_001016194	NP_001001730
A39456	NP_115495	XP_003643111	XP_002942472	NP_001001845
A39457	NP_066301	NP_001005798	XP_002938015	NP_001002175
A39459	NP_071895	XP_414944	XP_002941242	NP_001002228
A39461	NP_061169	XP_420628	XP_002940365	NP_001002301
A39462	NP_001092692	XP_003643118	NP_001016062	NP_001002385
A39465	NP_620128	NP_001007831	NP_001016130	NP_001002558
A39467	NP_001223	NP_989857	NP_989136	NP_001002682
A39468	NP_060365	NP_001006293	XP_002940090	NP_001002869
A39471	NP_060701	XP_414044	XP_002931704	NP_001003648
A39472	NP_078886	XP_422094	XP_002943191	NP_001003777
A39475	NP_001501	XP_420483	XP_002937281	NP_001004123
A39479	NP_071384	XP_426277	NP_989343	NP_001004659
A39480	NP_689477	NP_001008471	XP_002942107	NP_001005306
A39483	NP_612439	XP_416940	XP_002937017	NP_001006033
A39484	NP_071890	XP_418875	NP_001017170	NP_001006074
A39487	NP_085911	XP_416375	NP_001164296	NP_001007320
A39488	NP_055064	NP_989925	NP_001090633	NP_001007369
A39492	NP_079481	XP_003641296	NP_001096476	NP_001007771
A39496	NP_056081	NP_001034364	NP_001184191	NP_001008586
A39505	NP_002433	XP_415271	NP_001011470	NP_001013534
A39508	NP_003785	XP_422107	XP_002942641	NP_001014368
A39511	NP_065775	XP_003641201	NP_001135553	NP_001017554
A39512	NP_005008	XP_422725	XP_002934091	NP_001017634
A39513	NP_002245	XP_426988	XP_002942156	NP_001017849
A39516	NP_001018082	XP_001234771	XP_002938736	XP_003200483
A39517	NP_001098714	XP_419135	XP_002937517	NP_001018143
A39518	NP_066974	XP_003640711	NP_001128278	NP_001018161
A39522	NP_001073930	XP_414766	XP_002938457	NP_001018616
A39523	NP_004782	XP_416966	XP_002937131	NP_001019243
A39528	NP_001025046	XP_001234192	XP_002934243	NP_001070076
A39529	NP_001025169	NP_001026302	NP_001004977	NP_001003420
A39531	NP_002735	XP_417561	NP_001093735	NP_001025262
A39537	NP_653180	XP_420891	NP_001004915	NP_001025334
A39542	NP_005579	XP_420065	NP_001015767	NP_001122199
A39543	NP_055897	NP_989833	XP_002937296	NP_001027013
A39545	NP_056238	XP_417169	NP_001120584	NP_001028901
A39546	NP_149978	XP_414894	NP_001135550	NP_001028910
A39548	NP_116269	XP_417520	NP_001072240	NP_001029356
A39549	NP_003052	XP_421715	NP_001090702	NP_001030140
A39550	NP_477352	XP_415062	NP_001238804	NP_001030144
A39551	NP_660207	XP_001233060	NP_001072230	NP_001030152
A39555	NP_001137470	XP_415614	NP_001007910	NP_957392
A39556	NP_000867	NP_990301	XP_002933917	NP_001034716
A39559	NP_066568	XP_422093	XP_002943192	NP_001034917
A39563	NP_001036054	XP_001233115	XP_002943473	XP_001920832
A39564	NP_060209	XP_426653	NP_001121493	NP_001036152
A39565	NP_002305	NP_989462	NP_001072900	NP_001036156
A39567	NP_079106	XP_419059	XP_002933165	NP_001037806
A39569	NP_055475	NP_001012874	NP_001135681	NP_001038252
A39572	NP_000483	NP_001099136	XP_002935002	NP_001038348
A39575	NP_002171	NP_001026346	XP_002936547	NP_001038365
A39580	NP_068749	XP_425422	XP_002933153	NP_001038468
A39583	NP_001029027	NP_001026765	XP_002935298	NP_001038566
A39584	NP_001136221	XP_416843	XP_002935291	NP_001038575
A39586	NP_065833	XP_417237	XP_002941427	NP_001038601
A39588	NP_940933	XP_003640794	XP_002936489	NP_001038619
A39590	NP_056344	NP_989955	XP_002936361	NP_001038671
A39591	NP_003878	XP_001231632	XP_002935078	NP_001038672
A39595	NP_060793	NP_001026328	NP_001016953	NP_001038950
A39603	NP_001123482	NP_001026371	NP_001016489	NP_001070190
A39604	NP_667339	XP_418778	XP_002937897	NP_001070196
A39605	NP_001093167	XP_003642186	XP_002932021	NP_001070227
A39606	NP_653337	XP_419525	NP_001016145	NP_001070231
A39607	NP_937793	NP_001026586	XP_002933485	NP_001070625
A39610	NP_073620	NP_001186431	XP_002938018	NP_001070788
A39611	NP_001121613	XP_003641994	XP_002933707	NP_001070805
A39614	NP_001127928	XP_416618	XP_002932334	NP_001070849
A39618	NP_001071121	NP_989475	NP_001030292	NP_571581
A39620	NP_001192	NP_001029991	XP_002934044	NP_001071233
A39624	NP_001127845	NP_001026405	NP_001015773	NP_001073435
A39625	NP_004046	XP_417278	NP_001006736	XP_001345114
A39626	NP_001193884	XP_414435	NP_001135636	NP_001073520
A39636	NP_002596	XP_413834	XP_002939668	NP_001074096
A39637	NP_001156907	NP_001012595	NP_001096213	NP_001074106
A39638	NP_057114	XP_419934	NP_001006869	NP_001074113
A39639	NP_060677	XP_427363	NP_001120263	NP_001074143
A39644	NP_443136	XP_419827	NP_001016857	NP_001076491
A39645	NP_004707	NP_001025528	XP_002932953	NP_001076494
A39646	NP_001118230	XP_415740	NP_001120149	NP_001077316
A39650	NP_075069	XP_003640641	XP_002936590	NP_001082887
A39653	NP_060230	XP_003640726	XP_002935219	NP_001082961
A39654	NP_036345	XP_414174	NP_001120413	NP_001082972
A39656	NP_001032409	XP_414567	NP_001103523	NP_001091056
A39659	NP_000372	NP_989460	NP_001006876	XP_002663478
A39660	NP_060879	XP_420505	NP_001120069	NP_001092246
A39667	NP_037522	XP_003643071	XP_002935631	NP_001092919
A39668	NP_008920	XP_415761	XP_002933873	NP_001092921
A39670	NP_003719	NP_989782	XP_002936783	NP_001093454
A39675	NP_001073933	XP_001234724	NP_001120499	NP_001096091
A39680	NP_001094089	XP_001232075	XP_002934182	NP_001099135
A39683	NP_001093882	NP_001006379	NP_001107152	NP_001103942
A39685	NP_066015	XP_414693	XP_002936561	NP_001103995
A39686	NP_003122	NP_001239070	XP_002942523	NP_001103996
A39687	NP_055137	XP_426139	XP_002935712	NP_001104634
A39689	NP_001107000	NP_001186351	NP_001120214	XP_002662882
A39690	NP_006801	XP_422097	NP_001017340	NP_001107048
A39693	NP_071353	XP_415906	XP_002939678	NP_001107785
A39695	NP_065941	NP_001025956	NP_001135510	NP_001107893
A39698	NP_001108220	XP_429659	XP_002938894	XP_706440
A39700	NP_004695	XP_414243	XP_002935676	NP_001112367
A39703	NP_055848	XP_415469	NP_001072662	XP_690538
A39706	NP_002632	NP_001025979	XP_002942607	NP_001119918
A39709	NP_001121699	NP_001026603	NP_001072728	NP_957177
A39712	NP_079029	XP_422022	XP_002936805	NP_001121730
A39714	NP_000831	XP_416842	XP_002935292	NP_001121815
A39718	NP_055786	XP_420019	XP_002943410	NP_001122000
A39719	NP_055938	XP_423748	XP_002940561	XP_002662555
A39723	NP_001123237	XP_420279	NP_001017290	NP_001017674
A39728	NP_115899	XP_426065	NP_001017338	NP_997728
A39730	NP_079350	XP_420470	XP_002935497	NP_001124312
A39731	NP_002327	XP_417286	XP_002942697	NP_001128156
A39733	NP_055111	XP_418783	NP_998853	NP_001128580
A39738	NP_055747	NP_001074971	NP_001165297	NP_001135737
A39742	NP_001036064	NP_001025536	XP_002939659	NP_001137223
A39748	NP_001138829	XP_413695	XP_002937523	NP_001091650
A39750	NP_002238	NP_989555	XP_002937174	NP_001139072
A39754	NP_001139808	XP_001235110	XP_002939484	XP_001922308
A39756	NP_071414	XP_422633	XP_002941239	NP_001153311
A39757	NP_001135823	NP_001161219	NP_001107671	NP_001153386
A39758	NP_076976	XP_003641460	NP_001017344	NP_001153818
A39760	NP_004027	XP_003641104	NP_001096154	NP_001156014
A39762	NP_060530	NP_001006397	NP_001120515	NP_001157270
A39770	NP_054831	XP_418402	XP_002940055	NP_001171405
A39776	NP_660358	XP_419799	XP_002937207	NP_001186696
A39780	NP_057033	NP_001006159	NP_001016708	NP_001186836
A39784	NP_057062	NP_001191745	NP_001191750	NP_001191752
A39788	NP_005036	XP_425424	NP_001131084	NP_001233205
A39792	NP_036467	NP_990585	XP_002938604	NP_001243600
A39793	NP_001010898	XP_417942	XP_002933031	NP_001243653
A39795	NP_003952	XP_426761	XP_002935898	NP_001254516
A39796	NP_001281	NP_990160	XP_002938683	NP_571389
A39798	NP_001371	XP_421819	XP_002932708	NP_001103481
A39799	NP_001376	XP_418377	XP_002931585	NP_001116535
A39803	NP_001937	NP_989685	NP_001039043	NP_919361
A39804	NP_001957	XP_422690	XP_002936579	NP_996951
A39807	NP_002135	XP_003642841	XP_002938063	NP_571190
A39808	NP_002230	NP_990735	XP_002936698	XP_002663356
A39809	NP_002498	NP_001139605	XP_002935757	NP_001185589
A39810	NP_002513	XP_420081	NP_001121479	NP_998101
A39811	NP_002582	NP_990802	NP_001073036	NP_999916
A39813	NP_002652	XP_414166	XP_002934994	NP_001038433
A39814	NP_002655	NP_990194	NP_001025527	NP_957135
A39816	NP_002716	XP_418054	NP_001096208	XP_001923590
A39817	NP_001158230	XP_414754	NP_001072922	NP_001070091
A39819	NP_113680	XP_003643577	NP_989204	NP_955999
A39820	NP_002959	NP_990038	NP_001090646	NP_001139486
A39821	NP_003015	XP_416715	XP_002939390	NP_997065
A39826	NP_003879	NP_990326	NP_001039196	NP_571925
A39827	NP_004052	XP_418999	XP_002933176	NP_001153302
A39830	NP_004484	XP_423479	NP_001016511	NP_001006098
A39831	NP_004517	NP_001006139	NP_001006772	NP_775364
A39832	NP_004680	NP_001012971	NP_001011163	XP_001333273
A39834	NP_004738	XP_421604	XP_002937176	NP_001139075
A39835	NP_004761	XP_003640873	XP_002937117	XP_695259
A39836	NP_004789	NP_001012852	XP_002939701	NP_001093615
A39837	NP_004827	XP_420868	XP_002937326	NP_001070617
A39839	NP_004973	XP_416431	NP_001096325	NP_001025324
A39840	NP_001035199	NP_001025817	XP_002931891	NP_571755
A39841	NP_005019	NP_001026142	NP_001123723	NP_001122174
A39844	NP_005227	XP_414734	XP_002935520	NP_956079
A39845	NP_005246	XP_424873	NP_001016350	XP_001919224
A39848	NP_005513	XP_003640745	NP_001008017	NP_571611
A39849	NP_005559	NP_990744	NP_001093698	NP_571291
A39854	NP_005906	NP_001006527	NP_989393	NP_001076318
A39857	NP_006034	XP_414882	XP_002932036	NP_001074077
A39858	NP_006099	NP_990182	NP_001090741	NP_571590
A39859	NP_006152	NP_990214	NP_001116895	NP_571116
A39860	NP_006169	NP_001019627	NP_001072788	NP_001037793
A39861	NP_006209	NP_001004410	NP_001119972	XP_690235
A39862	NP_008954	XP_426579	XP_002934663	XP_687578
A39864	NP_036236	XP_417908	NP_001072485	NP_991267
A39866	NP_036286	XP_003640918	NP_001004877	XP_699226
A39867	NP_036375	NP_001026445	NP_989098	NP_001116721
A39869	NP_036475	XP_003642984	NP_001121474	NP_999921
A39872	NP_037437	NP_001001747	NP_001090748	NP_001191084
A39873	NP_037471	NP_989766	NP_001011458	NP_001003784
A39874	NP_055027	XP_428250	XP_002936692	NP_571240
A39875	NP_055086	XP_425563	XP_002933660	NP_001136054
A39878	NP_055297	XP_417667	XP_002935357	NP_001124072
A39879	NP_055400	NP_001012931	NP_001090746	NP_571704
A39880	NP_055543	XP_416838	XP_002933853	XP_003199310
A39882	NP_055577	NP_001026459	NP_001016800	NP_001008645
A39883	NP_055724	XP_003641412	NP_001135650	XP_003200451
A39886	NP_055952	XP_418436	XP_002939556	NP_957121
A39887	NP_056069	XP_003641120	XP_002939008	XP_700210
A39890	NP_056520	XP_416245	NP_001123837	NP_998495
A39891	NP_001257693	XP_421811	XP_002937852	XP_693895
A39894	NP_057600	XP_419349	XP_002939365	NP_001124248
A39895	NP_057608	XP_414910	NP_001096478	XP_001922508
A39896	NP_057737	XP_421996	XP_002934652	XP_687660
A39897	NP_059119	XP_420521	NP_001001200	NP_001018477
A39898	NP_060009	XP_424606	XP_002932028	XP_002666774
A39905	NP_060594	XP_414051	XP_002931710	XP_002667008
A39907	NP_060727	XP_417422	NP_001011087	NP_001035010
A39909	NP_061114	XP_417880	NP_001090809	NP_001015066
A39911	NP_061720	XP_003641622	XP_002937766	XP_690143
A39912	NP_061847	XP_419606	XP_002931523	NP_001038381
A39913	NP_065094	NP_001006344	NP_001120005	XP_001342149
A39915	NP_065706	XP_414192	XP_002936140	NP_001116174
A39916	NP_065751	XP_003640399	NP_001017305	NP_001070923
A39917	NP_065753	XP_424975	XP_002944008	XP_003200879
A39920	NP_065819	XP_425217	XP_002935310	NP_001122224
A39921	NP_065915	XP_422618	XP_002937141	XP_001340925
A39922	NP_066000	XP_422796	XP_002931595	XP_694632
A39923	NP_066545	NP_001012621	NP_001016164	NP_001006081
A39924	NP_066943	XP_426264	XP_002934927	XP_003199970
A39928	NP_071446	XP_413872	NP_001096501	NP_001002518
A39930	NP_071746	XP_418329	NP_001096422	NP_001017848
A39931	NP_078865	XP_424594	XP_002941090	NP_956257
A39932	NP_079146	XP_418285	XP_002935360	XP_001923357
A39934	NP_079224	XP_418629	NP_001001204	NP_001071224
A39937	NP_079434	NP_001244198	XP_002937774	XP_002667361
A39938	NP_112174	NP_001026404	NP_001027512	NP_001135847
A39939	NP_001229577	NP_989777	NP_001135639	NP_001107883
A39940	NP_001153844	XP_418422	NP_001135612	XP_003200576
A39944	NP_115690	NP_001006194	XP_002932125	NP_001004541
A39945	NP_115815	NP_001186433	NP_001072321	NP_001005602
A39946	NP_115920	XP_003642655	XP_002934922	XP_700618
A39947	NP_116115	XP_422063	XP_002933984	XP_694028
A39948	NP_116172	XP_420403	NP_001007873	NP_991219
A39952	NP_444277	XP_001231711	XP_002931892	NP_001076423
A39956	NP_542119	XP_417347	NP_001004943	NP_001074170
A39957	NP_542454	XP_418913	NP_001072302	NP_956253
A39958	NP_004813	NP_990750	XP_002937043	NP_571104
A39961	NP_689967	NP_990704	XP_002935293	NP_571123
A39963	NP_001097	NP_989648	NP_001006871	NP_571285
A39965	NP_055403	NP_990100	NP_001093670	NP_571408
A39966	NP_057240	NP_001034363	XP_002935623	NP_571446
A39967	NP_001257545	NP_001005616	XP_002934750	NP_571480
A39970	NP_002933	XP_416674	XP_002931813	NP_571708
A39971	NP_004778	NP_001254004	XP_002936761	NP_571810
A39974	NP_612199	XP_422133	XP_002941468	NP_001082963
A39977	NP_631948	XP_426681	NP_001120573	NP_001027011
A39978	NP_647480	XP_425451	XP_002936892	NP_001076304
A39979	NP_000737	NP_989512	XP_002937717	NP_957513
A39980	NP_647537	XP_420884	XP_002936412	NP_001139087
A39982	NP_689481	XP_422493	NP_001120088	NP_991118
A39983	NP_001032249	XP_422630	NP_001072621	NP_001002430
A39989	NP_000772	NP_001001756	XP_002934608	XP_691817
A39990	NP_001036008	XP_420527	XP_002933371	NP_694497
A39991	NP_001120652	XP_417277	XP_002937295	NP_694515
A39992	NP_001138353	XP_416036	NP_001016939	NP_899185
A39993	NP_694999	XP_003643063	NP_001072841	NP_001123869
A39994	NP_699192	NP_001239059	XP_002933080	XP_003199151
A39997	NP_733762	XP_416621	NP_001006802	XP_001921961
A39999	NP_758438	NP_001129257	XP_002933628	NP_001020717
A40001	NP_004094	XP_003641118	NP_001011049	NP_997735
A40003	NP_031388	XP_422700	NP_001006879	NP_775356
A40004	NP_056249	NP_001006399	XP_002934743	NP_775374
A40005	NP_060205	NP_001012585	XP_002934504	NP_775392
A40006	NP_065825	XP_419157	NP_001123407	NP_775393
A40007	NP_775785	XP_424731	NP_001011337	NP_001073468
A40008	NP_775817	XP_414393	XP_002933118	XP_001339575
A40013	NP_001171351	NP_001186441	XP_002936546	NP_001122205
A40014	NP_848591	XP_422716	XP_002934085	XP_684668
A40016	NP_852478	NP_990400	XP_002933090	XP_699485
A40024	NP_473368	NP_001012580	XP_002933168	NP_919351
A40025	NP_003276	NP_990607	NP_001107287	NP_919364
A40027	NP_000786	NP_001106761	XP_002937871	NP_922918
A40032	NP_079325	XP_426648	NP_001016603	NP_942102
A40033	NP_000276	NP_001073185	NP_001008094	NP_944594
A40034	NP_061330	XP_414749	NP_001093697	NP_001017830
A40035	NP_950252	XP_426633	XP_002934784	XP_001341569
A40036	NP_001489	XP_419910	NP_001072803	NP_954971
A40037	NP_001017405	NP_001012622	XP_002942234	NP_955843
A40039	NP_001138637	NP_001026584	NP_001120098	NP_955857
A40041	NP_001018011	XP_417898	XP_002937865	NP_955929
A40042	NP_071941	NP_989968	NP_001016472	NP_955990
A40047	NP_055120	XP_416988	XP_002939327	NP_956111
A40050	NP_000017	NP_990860	NP_001005457	NP_956193
A40053	NP_055854	XP_001234670	NP_001096243	NP_956298
A40056	NP_005868	NP_001026643	XP_002934317	NP_956388
A40057	NP_001229338	XP_419182	XP_002934164	NP_956463
A40059	NP_001026882	NP_989699	XP_002933235	NP_956510
A40060	NP_112494	NP_001186355	NP_001016245	NP_956533
A40062	NP_078805	NP_001026436	NP_001016031	NP_956642
A40063	NP_060147	NP_001012717	XP_002931842	NP_956688
A40065	NP_055486	NP_001026138	NP_001072518	NP_956767
A40067	NP_061896	NP_001005831	NP_001017321	NP_956797
A40069	NP_002442	NP_001026775	NP_001011495	NP_956848
A40070	NP_064716	XP_419847	XP_002933968	NP_956911
A40072	NP_004260	XP_415455	NP_001011132	NP_956954
A40075	NP_002970	XP_422482	NP_001015795	NP_957159
A40076	NP_054722	NP_001025753	XP_002937626	NP_957170
A40082	NP_076417	NP_001006184	NP_001039244	NP_957303
A40087	NP_003390	XP_420139	XP_002940335	NP_957326
A40088	NP_002573	NP_001025800	NP_001184102	NP_957382
A40090	NP_001124162	XP_419613	XP_002939024	NP_957396
A40093	NP_149094	XP_414133	NP_001120536	NP_957472
A40095	NP_002850	NP_990315	NP_001135504	NP_963882
A40096	NP_149989	XP_003641931	NP_001096344	NP_991115
A40098	NP_078898	XP_422009	NP_001039188	NP_991192
A40101	NP_003001	XP_415583	NP_001107157	NP_991299
A40103	NP_443182	NP_001073218	XP_002936770	NP_991308
A40106	NP_997320	XP_415109	XP_002935244	XP_698507
A40107	NP_036601	XP_417426	NP_001025642	NP_997820
A40108	NP_620614	NP_990470	XP_002941055	NP_001038240
A40110	NP_060589	XP_414921	NP_001016970	NP_997919
A40113	NP_000101	XP_426639	XP_002933845	NP_998058
A40114	NP_064520	XP_418979	NP_001121492	NP_998085
A40116	NP_064518	XP_419616	NP_001011265	NP_998157
A40117	NP_004058	XP_425997	XP_002933428	XP_699642
A40122	NP_699185	XP_424528	XP_002933969	NP_998536
A40123	NP_003975	XP_425404	NP_001008098	NP_998617
A40125	NP_000242	XP_426110	XP_002935427	NP_998689
A40127	NP_001086	NP_001035557	XP_002935779	NP_999954
A40128	NP_071407	XP_421595	XP_002939565	NP_999974
A40140	NP_001010924	XP_418631	XP_002939068	XP_001335931
A40144	NP_001243793	NP_001170886	NP_001120147	XP_001336673
A40149	NP_008960	NP_990512	NP_001005133	NP_001005923
A40151	NP_997530	XP_424884	XP_002934035	XP_001340260
A40156	NP_001193849	XP_001235789	XP_002933774	XP_001341551
A40158	NP_620686	XP_417874	XP_002938155	NP_001119901
A40159	NP_115941	XP_415400	XP_002941116	XP_001342238
A40163	NP_005391	XP_419464	NP_001107724	XP_001344217
A40164	NP_808218	XP_415923	XP_002933559	NP_001136038
A40168	NP_055742	XP_425567	NP_001093681	XP_001919009
A40169	NP_065812	XP_426232	NP_001123843	XP_001919288
A40172	NP_001073944	XP_421947	XP_002937160	XP_001919480
A40176	NP_055789	XP_418558	NP_001072610	XP_001919743
A40179	NP_065744	XP_003642660	XP_002932951	XP_001920060
A40180	NP_982272	XP_424926	XP_002935647	XP_001920107
A40186	NP_071757	XP_421710	NP_001072380	XP_001920456
A40187	NP_002323	NP_990573	XP_002939758	XP_001920591
A40190	NP_056404	XP_421450	NP_001072580	XP_001920698
A40191	NP_056493	NP_001239069	XP_002934066	XP_001920727
A40192	NP_055061	XP_423746	XP_002932249	XP_002661517
A40194	NP_065845	XP_003641743	NP_001072594	XP_001920812
A40195	NP_056130	XP_414577	NP_001135665	XP_001920902
A40203	NP_000829	XP_419652	XP_002931565	XP_001921594
A40205	NP_055806	XP_420572	XP_002937925	XP_001921741
A40209	NP_001180380	XP_416374	XP_002942298	XP_001922025
A40211	NP_002242	XP_001232667	XP_002938059	XP_001922193
A40213	NP_001073892	XP_414383	XP_002938276	XP_001922281
A40215	NP_001073899	XP_414090	NP_001121484	XP_001922515
A40217	NP_001158136	XP_424757	XP_002934250	XP_001922596
A40219	NP_919290	XP_422196	NP_001116901	XP_001922702
A40221	NP_056240	XP_420851	XP_002937328	XP_001922839
A40222	NP_056391	XP_001232640	XP_002940072	XP_001922876
A40223	NP_922932	XP_424749	XP_002934253	XP_001923204
A40224	NP_055891	XP_419786	NP_001107512	XP_001923353
A40225	NP_003707	XP_001233835	NP_001096182	XP_002663813
A40228	NP_031394	NP_001012843	XP_002937911	XP_002660361
A40230	NP_631906	XP_429984	XP_002934711	XP_002660447
A40231	NP_072091	XP_420638	XP_002934293	XP_002660470
A40234	NP_055524	NP_001186345	XP_002939554	XP_002660609
A40236	NP_060493	XP_003641772	NP_001107505	XP_002660941
A40239	NP_001193928	XP_415277	NP_001120601	XP_002661971
A40241	NP_001107604	XP_421964	XP_002937765	XP_002662311
A40243	NP_919231	NP_001006513	XP_002932056	XP_002662447
A40244	NP_004312	XP_422660	XP_002933380	XP_002662484
A40246	NP_006507	NP_990540	NP_001072458	XP_002662574
A40248	NP_065069	NP_001026017	XP_002932905	XP_002662611
A40250	NP_066013	XP_003641874	XP_002938393	XP_002662886
A40257	NP_036434	NP_001177406	XP_002931717	XP_002663750
A40263	NP_000042	NP_001155872	XP_002934974	XP_002664603
A40271	NP_620711	XP_422604	NP_001116263	XP_002665457
A40273	NP_060460	XP_414050	XP_002931709	XP_002665475
A40283	NP_001123553	XP_422793	XP_002931597	NP_001153567
A40289	NP_001137854	XP_418744	XP_002932453	XP_002667725
A40306	NP_066363	XP_417395	XP_002935580	XP_003198892
A40308	NP_056122	XP_413772	NP_001072372	XP_003199016
A40310	NP_001164171	XP_003641264	XP_002938700	XP_003199045
A40314	NP_056126	XP_003641689	XP_002942594	XP_003199290
A40315	NP_203752	XP_422174	XP_002933328	XP_003199303
A40318	NP_001005207	NP_001006224	NP_001090733	XP_003199407
A40320	NP_055831	XP_418247	XP_002934843	XP_003199517
A40325	NP_008986	NP_001006500	NP_001096178	XP_003199716
A40332	NP_003096	XP_001232946	XP_002941683	XP_003200086
A40342	NP_060910	XP_418306	XP_002936667	XP_003200660
A40344	NP_079150	XP_417781	XP_002938878	XP_003200686
A40346	NP_777596	XP_003641739	XP_002931479	XP_003200725
A40347	NP_060510	NP_001026217	XP_002936068	XP_003200809
A40348	NP_775937	NP_001026613	NP_001016607	XP_003200847
A40351	NP_060606	XP_422197	XP_002932224	XP_003201115
A40353	NP_116289	NP_001012927	XP_002939704	XP_003201186
A40357	NP_001036068	XP_416379	XP_002941946	XP_003201688
A40361	NP_001138940	NP_001038102	NP_001037875	NP_001034905
A40362	NP_078857	XP_419763	XP_002932158	XP_683302
A40366	NP_115507	XP_419797	XP_002940593	XP_683582
A40369	NP_112220	XP_418287	XP_002935370	XP_684701
A40373	NP_002733	NP_001026372	NP_001120884	XP_685219
A40377	NP_277040	NP_001026699	NP_001004832	XP_685817
A40378	NP_000332	XP_426125	NP_001072903	XP_685969
A40379	NP_061172	XP_418563	XP_002935222	XP_686426
A40381	NP_006600	XP_422075	XP_002942055	XP_686613
A40383	NP_001103	NP_001104544	NP_001096190	XP_687110
A40384	NP_056112	XP_424982	NP_001072490	XP_687326
A40386	NP_996994	XP_414793	NP_001016834	XP_687871
A40389	NP_056009	XP_418085	XP_002935562	XP_688008
A40391	NP_071387	XP_001234172	NP_001017341	XP_688220
A40395	NP_036547	NP_990041	NP_001121509	XP_688979
A40398	NP_110419	NP_001032348	NP_001120593	XP_689132
A40403	NP_001099050	XP_428531	XP_002933116	NP_001122232
A40408	NP_003619	NP_001006529	NP_001257619	XP_690071
A40411	NP_056471	XP_421394	XP_002939780	XP_690215
A40412	NP_001034200	NP_001032352	XP_002937892	XP_690252
A40415	NP_005035	XP_416852	XP_002941045	XP_690430
A40416	NP_001120686	XP_425134	NP_001121382	XP_690782
A40417	NP_004786	XP_417105	XP_002934067	XP_690797
A40418	NP_055861	XP_415453	XP_002936221	XP_690945
A40419	NP_067049	XP_421651	XP_002940376	XP_690970
A40422	NP_877497	XP_424632	NP_001106408	XP_691455
A40426	NP_055211	NP_001012877	XP_002932756	XP_691671
A40428	NP_878907	XP_417248	XP_002942567	XP_691737
A40429	NP_000824	XP_425252	XP_002939231	XP_691754
A40432	NP_002038	NP_001026681	NP_001007492	XP_692410
A40433	NP_001049	NP_990199	NP_001106489	XP_692469
A40437	NP_660153	XP_001232754	XP_002940644	XP_692963
A40438	NP_061152	XP_003640389	XP_002933152	XP_692965
A40440	NP_065816	XP_417626	XP_002943253	XP_693147
A40446	NP_008969	XP_425541	XP_002935740	XP_693454
A40450	NP_001007472	XP_424831	XP_002935641	XP_694167
A40452	NP_000780	NP_001161204	NP_001116882	XP_694336
A40461	NP_997289	XP_420730	XP_002933498	XP_695315
A40469	NP_056006	XP_001231564	XP_002932962	XP_696325
A40471	NP_001010872	XP_426203	XP_002934897	XP_696880
A40473	NP_078856	XP_001232512	XP_002940146	XP_697184
A40474	NP_055058	XP_426316	XP_002940398	XP_697234
A40476	NP_000721	NP_001074970	XP_002939147	XP_697493
A40479	NP_004276	XP_425746	NP_001106505	XP_697820
A40480	NP_006124	XP_423696	XP_002937682	XP_697873
A40481	NP_060250	NP_001071054	XP_002936158	XP_697956
A40482	NP_689645	XP_417185	XP_002935619	XP_698022
A40492	NP_005115	XP_418937	XP_002932736	XP_700317
A40496	NP_055461	NP_001006386	NP_001072517	XP_707850
A40504	NP_075050	XP_414336	NP_001005453	NP_001001400
A40505	NP_065143	XP_423767	NP_001121512	NP_001001403
A40506	NP_061153	NP_001001767	NP_001001857	NP_001001828
A40507	NP_060480	XP_416624	NP_001016561	NP_001001832
A40511	NP_001073952	XP_001236919	XP_002942964	NP_001002088
A40512	NP_872353	XP_003643574	NP_001015779	NP_001002134
A40513	NP_570981	NP_001008475	NP_001004983	NP_001002146
A40518	NP_075567	XP_418113	NP_001007969	NP_001002330
A40525	NP_001018060	XP_416229	NP_001072397	NP_001002476
A40528	NP_006813	XP_415603	NP_001072188	NP_001002524
A40529	NP_116321	XP_425379	NP_001096170	NP_001002533
A40530	NP_057394	XP_001231486	NP_001015803	NP_001002553
A40531	NP_076962	XP_416326	NP_001016757	NP_001002619
A40533	NP_078863	XP_422420	NP_001107322	NP_001002637
A40537	NP_065397	NP_001186370	NP_001072678	NP_001002699
A40543	NP_113615	NP_001186610	NP_001016312	NP_001003442
A40544	NP_004608	XP_001234023	NP_988958	NP_001003489
A40545	NP_003645	XP_426423	XP_002934119	NP_001003518
A40546	NP_991111	XP_003643128	XP_002934860	NP_001003531
A40549	NP_919274	NP_001026393	XP_002937154	NP_956704
A40550	NP_116182	XP_417826	NP_001072635	NP_001003570
A40552	NP_000815	XP_420379	NP_001072255	NP_001003587
A40553	NP_056278	XP_419337	NP_001120556	XP_684894
A40554	NP_003260	NP_990501	XP_002937209	NP_001003608
A40557	NP_000008	NP_001006193	NP_989269	NP_001003743
A40559	NP_940967	XP_422668	NP_001231915	NP_001003775
A40560	NP_000961	NP_989483	NP_001135507	NP_001003844
A40561	NP_055954	XP_422532	XP_002939018	NP_001003877
A40562	NP_001164653	NP_001006569	NP_001037910	NP_001003878
A40563	NP_006504	NP_001026563	NP_998852	NP_001003882
A40565	NP_783860	XP_003641361	XP_002938083	NP_001003985
A40569	NP_872375	XP_415876	NP_001017323	NP_001004118
A40570	NP_005302	NP_001034371	NP_001120881	XP_690519
A40571	NP_683710	XP_415721	NP_001122119	NP_001004290
A40573	NP_116228	XP_422095	NP_001016971	NP_001004597
A40574	NP_689604	XP_419953	NP_001015930	NP_001004615
A40575	NP_006574	NP_001073227	XP_002934288	NP_001004654
A40576	NP_569713	NP_001026474	XP_002933397	NP_001005316
A40579	NP_004743	NP_001008480	XP_002932714	NP_001005603
A40580	NP_008929	XP_419087	NP_001072782	NP_001005776
A40584	NP_055239	XP_427836	NP_001120889	NP_001006040
A40586	NP_057044	NP_001006503	NP_001011220	NP_001006046
A40589	NP_659425	XP_430156	XP_002933844	NP_001006092
A40591	NP_065171	NP_001025860	NP_001017014	NP_001007062
A40596	NP_001091048	NP_001074355	NP_001123742	NP_001007216
A40602	NP_000670	XP_414483	XP_002943114	XP_001922013
A40603	NP_009194	NP_001006339	NP_001106450	NP_001007365
A40607	NP_002452	XP_423130	XP_002942038	NP_001007423
A40609	NP_001121631	NP_001012824	XP_002934389	NP_001007459
A40611	NP_003562	NP_990549	XP_002937781	NP_001008633
A40614	NP_079065	NP_001026403	NP_001120294	NP_001008654
A40615	NP_004455	XP_001233791	XP_002934055	NP_001009561
A40618	NP_004043	XP_421829	NP_001015859	NP_001012245
A40623	NP_057097	XP_421138	NP_001017153	NP_001013326
A40624	NP_006784	XP_426543	NP_001025608	NP_001013478
A40625	NP_055567	XP_417247	NP_001011222	NP_001013487
A40626	NP_057437	XP_420689	NP_001072234	NP_001013510
A40631	NP_001116640	XP_417970	NP_001016354	NP_001013563
A40636	NP_073592	XP_414295	NP_001072748	NP_001014346
[truncated: 3,249 more rows]
